# Supplementary material for: D-Amino Acid-Containing Lipopeptides Derived from the Lead Peptide BP100 with Activity against Plant Pathogens
Source: MDPI journal article supplement (doi:10.3390/ijms22126631), 2021-06-21

# D-Amino Acid-Containing Lipopeptides Derived from the Lead Peptide BP100 with Activity against Plant Pathogens

Àngel Oliveras <sup>1</sup>, Luís Moll <sup>2</sup>, Gerard Riesco-Llach <sup>1</sup>, Arnau Tolosa-Canudas <sup>1</sup>, Sergio Gil-Caballero <sup>3</sup>, Esther Badosa <sup>2</sup>, Anna Bonaterra <sup>2</sup>, Emilio Montesinos <sup>2</sup>, Marta Planas <sup>1,\*</sup> and Lidia Feliu <sup>1,\*</sup>

## Table of contents:

|                                                                                           |    |
|-------------------------------------------------------------------------------------------|----|
| 1. Biological activity of lipopeptides.....                                               | 2  |
| 2. Synthesis of lipopeptides .....                                                        | 5  |
| 3. HPLC of crude and purified lipopeptides, ESI-MS and HRMS of purified lipopeptides .... | 11 |
| 4. NMR experiments of lipopeptides <b>BP389</b> and <b>BP475</b> .....                    | 81 |

# 1. Biological activity of lipopeptides

**Table S1. Antimicrobial activity (MIC) of lipopeptides**

| Peptide <sup>a</sup> | MIC (μM)               |                         |                         |                        |                         |                         |                        |                        |
|----------------------|------------------------|-------------------------|-------------------------|------------------------|-------------------------|-------------------------|------------------------|------------------------|
|                      | <i>Ea</i> <sup>b</sup> | <i>Pss</i> <sup>b</sup> | <i>Xap</i> <sup>b</sup> | <i>Xf</i> <sup>b</sup> | <i>Psa</i> <sup>b</sup> | <i>Xav</i> <sup>b</sup> | <i>Pe</i> <sup>b</sup> | <i>Fo</i> <sup>b</sup> |
| BP367                | 3.1-6.2                | 3.1-6.2                 | 3.1-6.2                 | 3.1-6.2                | 3.1-6.2                 | 3.1-6.2                 | 12.5-25                | 1.6-3.1                |
| BP472                | 3.1-6.2                | 3.1-6.2                 | 1.6-3.1                 | 1.6-3.1                | 1.6-3.1                 | 1.6-3.1                 | >25                    | 3.1-6.2                |
| BP371                | 3.1-6.2                | 3.1- 6.2                | 3.1- 6.2                | 3.1-6.2                | 3.1-6.2                 | 3.1-6.2                 | 3.1-6.2                | 0.8-1.6                |
| BP484                | 6.2-12.5               | 3.1-6.2                 | 3.1-6.2                 | 1.6-3.1                | 3.1-6.2                 | 6.2-12.5                | 6.2-12.5               | 1.6-3.1                |
| BP374                | 3.1-6.2                | 6.2-12.5                | 6.2-12.5                | 3.1-6.2                | 3.1-6.2                 | 6.2-12.5                | >25                    | 0.8-1.6                |
| BP494                | 6.2-12.5               | 3.1-6.2                 | 6.2-12.5                | 12.5-25                | 3.1-6.2                 | 6.2-12.5                | 0.8-1.6                | 3.1-6.2                |
| BP378                | 3.1-6.2                | 6.2-12.5                | 3.1-6.2                 | 3.1-6.2                | 3.1-6.2                 | 3.1-6.2                 | 3.1-6.2                | 0.8-1.6                |
| BP495                | 3.1-6.2                | 3.1-6.2                 | 3.1-6.2                 | 6.2-12.5               | 1.6-3.1                 | 6.2-12.5                | 0.8-1.6                | 1.6-3.1                |
| BP379                | 3.1-6.2                | 3.1-6.2                 | 3.1-6.2                 | 3.1-6.2                | 3.1-6.2                 | 3.1-6.2                 | 6.2-12.5               | 3.1-6.2                |
| BP485                | 6.2-12.5               | 3.1-6.2                 | 1.6-3.1                 | 1.6-3.1                | 3.1-6.2                 | 1.6-3.1                 | 3.1-6.2                | 1.6-3.1                |
| BP381                | 3.1-6.2                | 3.1-6.2                 | 3.1-6.2                 | 1.6-3.1                | 3.1-6.2                 | 1.6-3.1                 | 1.6-3.1                | 0.8-1.6                |
| BP486                | 6.2-12.5               | 12.5-25                 | 3.1-6.2                 | 3.1-6.2                | 6.2-12.5                | 6.2-12.5                | 6.2-12.5               | 0.8-1.6                |
| BP384                | 3.1-6.2                | 6.2-12.5                | 3.1-6.2                 | 1.6-3.1                | 6.2-12.5                | 1.6-3.1                 | 12.5-25                | 1.6-3.1                |
| BP498                | 6.2-12.5               | 6.2-12.5                | 1.6-3.1                 | 3.1-6.2                | 6.2-12.5                | 1.6-3.1                 | 1.6-3.1                | 0.8-1.6                |
| BP385                | 6.2-12.5               | 6.2-12.5                | 0.8-1.6                 | 1.6-3.1                | 6.2-12.5                | 0.8-1.6                 | 6.2-12.5               | 1.6-3.1                |
| BP473                | 3.1-6.2                | 6.2-12.5                | 1.6-3.1                 | 1.6-3.1                | 3.1-6.2                 | 1.6-3.1                 | >25                    | 0.8-1.6                |
| BP387                | 3.1-6.2                | 3.1-6.2                 | 3.1-6.2                 | 1.6-3.1                | 3.1-6.2                 | 1.6-3.1                 | 6.2-12.5               | 0.8-1.6                |
| BP474                | 6.2-12.5               | 3.1-6.2                 | 3.1-6.2                 | 6.2-12.5               | 1.6-3.1                 | 3.1-6.2                 | 3.1-6.2                | 0.8-1.6                |
| BP388                | 3.1-6.2                | 6.2-12.5                | 3.1-6.2                 | 1.6-3.1                | 6.2-12.5                | 1.6-3.1                 | 6.2-12.5               | 0.8-1.6                |
| BP499                | 3.1-6.2                | 6.2-12.5                | 3.1-6.2                 | 3.1-6.2                | 3.1-6.2                 | 1.6-3.1                 | 1.6-3.1                | 0.8-1.6                |
| BP389                | 3.1-6.2                | 6.2-12.5                | 0.8-1.6                 | 1.6-3.1                | 3.1-6.2                 | 0.8-1.6                 | 6.2-12.5               | 1.6-3.1                |
| BP475                | 3.1-6.2                | 3.1-6.2                 | 0.8-1.6                 | 1.6-3.1                | 1.6-3.1                 | 1.6-3.1                 | 3.1-6.2                | 0.8-1.6                |
| BP390                | 3.1-6.2                | 6.2-12.5                | 6.2-12.5                | 3.1-6.2                | 6.2-12.5                | 3.1-6.2                 | 6.2-12.5               | 0.8-1.6                |
| BP496                | 6.2-12.5               | 6.2-12.5                | 1.6-3.1                 | 12.5-25                | 3.1-6.2                 | 12.5-25                 | 3.1-6.2                | 1.6-3.1                |
| BP394                | 12.5-25                | 6.2-12.5                | 1.6-3.1                 | 0.8- 1.6               | 6.2-12.5                | 1.6-3.1                 | 12.5-25                | 6.2-12.5               |
| BP500                | 6.2-12.5               | 3.1-6.2                 | 1.6-3.1                 | 1.6-3.1                | 3.1-6.2                 | 0.8-1.6                 | 6.2-12.5               | 3.1-6.2                |
| BP395                | 12.5-25                | 3.1-6.2                 | 1.6-3.1                 | 1.6-3.1                | 3.1-6.2                 | 1.6-3.1                 | 12.5-25                | 6.2-12.5               |
| BP488                | 6.2-12.5               | 3.1-6.2                 | 1.6-3.1                 | 1.6-3.1                | 3.1-6.2                 | 1.6-3.1                 | 12.5-25                | >25                    |
| BP398                | >25                    | 3.1-6.2                 | 1.6-3.1                 | 3.1-6.2                | 3.1-6.2                 | 0.8-1.6                 | >25                    | 6.2-12.5               |
| BP489                | 6.2-12.5               | 3.1-6.2                 | 1.6-3.1                 | 3.1-6.2                | 3.1-6.2                 | 1.6-3.1                 | 12.5-25                | >25                    |
| BP399                | >25                    | 3.1-6.2                 | 1.6-3.1                 | 3.1-6.2                | 3.1-6.2                 | 0.8-1.6                 | 12.5-25                | 6.2-12.5               |
| BP490                | >25                    | 6.2-12.5                | 1.6-3.1                 | 1.6-3.1                | 3.1-6.2                 | 1.6-3.1                 | 12.5-25                | >25                    |
| BP400                | >25                    | >25                     | 1.6-3.1                 | 3.1-6.2                | >25                     | 1.6-3.1                 | >25                    | 6.2-12.5               |
| BP497                | >25                    | >25                     | 1.6-3.1                 | 0.8-1.6                | >25                     | 1.6-3.1                 | 12.5-25                | >25                    |
| BP402                | 3.1-6.2                | 3.1-6.2                 | 1.6-3.1                 | 3.1-6.2                | 3.1-6.2                 | 1.6-3.1                 | 12.5-25                | 6.2-12.5               |
| BP476                | 6.2-12.5               | 6.2-12.5                | 1.6-3.1                 | 1.6-3.1                | 1.6-3.1                 | 1.6-3.1                 | 12.5-25                | 12.5-25                |

<sup>a</sup>For each group of peptides, the top sequence corresponds to the all-L derivative

<sup>b</sup>*Ea*, *Erwinia amylovora*; *Pss*, *Pseudomonas syringae* pv. *syringae*; *Xap*, *Xanthomonas arboricola* pv. *pruni*; *Xf*, *Xanthomonas fragariae*; *Psa*, *Pseudomonas syringae* pv. *actinidiae*; *Xav*, *Xanthomonas axonopodis* pv. *vesicatoria*; *Pe*, *Penicillium expansum*; *Fo*, *Fusarium oxysporum*.

**Table S2. Hemolytic activity**

| Lipopeptide <sup>a</sup> | Hemolysis (%) <sup>b</sup> |               |               |               |
|--------------------------|----------------------------|---------------|---------------|---------------|
|                          | 50 $\mu$ M                 | 150 $\mu$ M   | 250 $\mu$ M   | 375 $\mu$ M   |
| BP367                    | 89 $\pm$ 2                 | 87 $\pm$ 14   | 83 $\pm$ 6    | 95 $\pm$ 13   |
| BP472                    | 21 $\pm$ 5                 | 66 $\pm$ 3    | 78 $\pm$ 5    | 90 $\pm$ 3    |
| BP371                    | 22 $\pm$ 4                 | 47 $\pm$ 2    | 75 $\pm$ 4    | 95 $\pm$ 3    |
| BP484                    | 3 $\pm$ 0.1                | 5 $\pm$ 0.9   | 10 $\pm$ 2    | 15 $\pm$ 4    |
| BP374                    | 4 $\pm$ 2                  | 8 $\pm$ 0.4   | 19 $\pm$ 3    | 28 $\pm$ 2    |
| BP494                    | 0 $\pm$ 0.5                | 0.3 $\pm$ 0.8 | 0.2 $\pm$ 0.2 | 0.4 $\pm$ 0.5 |
| BP378                    | 15 $\pm$ 7                 | 21 $\pm$ 2    | 26 $\pm$ 0.4  | 52 $\pm$ 6    |
| BP495                    | 0 $\pm$ 0.4                | 0 $\pm$ 0.4   | 0.6 $\pm$ 1   | 1 $\pm$ 2     |
| BP379                    | 60 $\pm$ 10                | 86 $\pm$ 2    | 93 $\pm$ 0.8  | 96 $\pm$ 1    |
| BP485                    | 9 $\pm$ 0.4                | 16 $\pm$ 4    | 24 $\pm$ 9    | 46 $\pm$ 5    |
| BP381                    | 11 $\pm$ 2                 | 30 $\pm$ 3    | 54 $\pm$ 6    | 76 $\pm$ 2    |
| BP486                    | 3 $\pm$ 2                  | 6 $\pm$ 2     | 14 $\pm$ 5    | 14 $\pm$ 2    |
| BP384                    | 41 $\pm$ 15                | 97 $\pm$ 10   | 100 $\pm$ 4   | 100 $\pm$ 2   |
| BP498                    | 6 $\pm$ 1                  | 17 $\pm$ 2    | 21 $\pm$ 3    | 36 $\pm$ 2    |
| BP385                    | 42 $\pm$ 3                 | 98 $\pm$ 8    | 100 $\pm$ 3   | 100 $\pm$ 4   |
| BP473                    | 7 $\pm$ 2                  | 41 $\pm$ 4    | 84 $\pm$ 11   | 75 $\pm$ 12   |
| BP387                    | 4 $\pm$ 0.9                | 11 $\pm$ 5    | 14 $\pm$ 0.5  | 18 $\pm$ 1    |
| BP474                    | 0 $\pm$ 0                  | 0 $\pm$ 0     | 0 $\pm$ 0     | 0 $\pm$ 0     |
| BP388                    | 10 $\pm$ 1                 | 32 $\pm$ 3    | 38 $\pm$ 4    | 89 $\pm$ 10   |
| BP499                    | 3 $\pm$ 0.8                | 7 $\pm$ 0.3   | 11 $\pm$ 1    | 17 $\pm$ 1    |
| BP389                    | 9 $\pm$ 4                  | 17 $\pm$ 0.7  | 22 $\pm$ 2    | 39 $\pm$ 3    |
| BP475                    | 0 $\pm$ 0                  | 0 $\pm$ 0     | 0 $\pm$ 0     | 0 $\pm$ 0     |
| BP390                    | 1 $\pm$ 0.2                | 2 $\pm$ 0.2   | 5 $\pm$ 0.3   | 7 $\pm$ 0.9   |
| BP496                    | 0 $\pm$ 1                  | 0 $\pm$ 0.2   | 1 $\pm$ 1     | 1 $\pm$ 0.5   |
| BP394                    | 100 $\pm$ 7                | 100 $\pm$ 7   | 100 $\pm$ 1   | 100 $\pm$ 2   |
| BP500                    | 74 $\pm$ 5                 | 71 $\pm$ 2    | 71 $\pm$ 8    | 77 $\pm$ 5    |
| BP395                    | 100 $\pm$ 2                | 100 $\pm$ 2   | 100 $\pm$ 2   | 100 $\pm$ 2   |
| BP488                    | 71 $\pm$ 2                 | 84 $\pm$ 9    | 86 $\pm$ 14   | 82 $\pm$ 7    |
| BP398                    | 70 $\pm$ 18                | 100 $\pm$ 9   | 100 $\pm$ 3   | 100 $\pm$ 5   |
| BP489                    | 50 $\pm$ 5                 | 83 $\pm$ 15   | 100 $\pm$ 6   | 100 $\pm$ 1   |
| BP399                    | 94 $\pm$ 8                 | 100 $\pm$ 5   | 100 $\pm$ 5   | 100 $\pm$ 6   |
| BP490                    | 100 $\pm$ 3                | 92 $\pm$ 17   | 100 $\pm$ 6   | 98 $\pm$ 2    |
| BP400                    | 43 $\pm$ 3                 | 56 $\pm$ 1    | 99 $\pm$ 0.4  | 100 $\pm$ 14  |
| BP497                    | 88 $\pm$ 14                | 100 $\pm$ 2   | 100 $\pm$ 2   | 100 $\pm$ 4   |
| BP402                    | 95 $\pm$ 6                 | 93 $\pm$ 13   | 100 $\pm$ 4   | 100 $\pm$ 0.5 |
| BP476                    | 69 $\pm$ 3                 | 79 $\pm$ 7    | 94 $\pm$ 10   | 94 $\pm$ 67   |

<sup>a</sup>For each group of peptides, the top sequence corresponds to the all-L derivative

<sup>b</sup>Percent hemolysis plus confidence interval ( $\alpha = 0.05$ )

**Table S3. Size of the lesion in infiltrated tobacco leaves**

| Lipopeptide <sup>a</sup> | Size of the lesion (mm) <sup>b</sup> |              |              |
|--------------------------|--------------------------------------|--------------|--------------|
|                          | 50 $\mu$ M                           | 150 $\mu$ M  | 250 $\mu$ M  |
| BP367                    | 6 $\pm$ 0.4                          | 9 $\pm$ 2    | 15 $\pm$ 4   |
| BP472                    | 2 $\pm$ 1                            | 4 $\pm$ 1    | 4 $\pm$ 1    |
| BP371                    | 2 $\pm$ 0.5                          | -            | 9 $\pm$ 2    |
| BP484                    | 0 $\pm$ 0                            | 2 $\pm$ 2    | 7 $\pm$ 1    |
| BP374                    | 3 $\pm$ 0.6                          | 9 $\pm$ 2    | 12 $\pm$ 3   |
| BP494                    | 1 $\pm$ 1                            | 6 $\pm$ 1    | 8 $\pm$ 1    |
| BP378                    | 4 $\pm$ 0.7                          | 12 $\pm$ 3   | 13 $\pm$ 5   |
| BP495                    | 3 $\pm$ 0                            | 6 $\pm$ 2    | 11 $\pm$ 2   |
| BP379                    | 7 $\pm$ 1                            | 13 $\pm$ 3   | 16 $\pm$ 3   |
| BP485                    | 4 $\pm$ 0.7                          | 7 $\pm$ 0.7  | 12 $\pm$ 1   |
| BP381                    | 5 $\pm$ 2                            | 11 $\pm$ 2   | 11 $\pm$ 2   |
| BP486                    | 4 $\pm$ 1                            | 8 $\pm$ 1    | 17 $\pm$ 2   |
| BP384                    | 8 $\pm$ 1                            | 11 $\pm$ 3   | 11 $\pm$ 2   |
| BP498                    | 4 $\pm$ 3                            | 6 $\pm$ 2    | 6 $\pm$ 1    |
| BP385                    | 8 $\pm$ 1                            | 13 $\pm$ 2   | 13 $\pm$ 2   |
| BP473                    | 2 $\pm$ 2                            | 4 $\pm$ 0.9  | 5 $\pm$ 2    |
| BP387                    | 3 $\pm$ 0.7                          | 8 $\pm$ 1    | 9 $\pm$ 1    |
| BP474                    | 0 $\pm$ 0                            | 2 $\pm$ 2    | 4 $\pm$ 2    |
| BP388                    | 8 $\pm$ 2                            | 11 $\pm$ 0.4 | 10 $\pm$ 3   |
| BP499                    | 6 $\pm$ 1                            | 8 $\pm$ 2    | 8 $\pm$ 2    |
| BP389                    | 4 $\pm$ 1                            | 7 $\pm$ 1    | 9 $\pm$ 3    |
| BP475                    | 5 $\pm$ 1                            | 7 $\pm$ 2    | 10 $\pm$ 1   |
| BP390                    | 3 $\pm$ 0.7                          | 7 $\pm$ 1    | 8 $\pm$ 2    |
| BP496                    | 3 $\pm$ 0.5                          | 4 $\pm$ 0.5  | 10 $\pm$ 3   |
| BP394                    | 3 $\pm$ 0.7                          | 12 $\pm$ 1   | 13 $\pm$ 0.6 |
| BP500                    | 3 $\pm$ 2                            | 6 $\pm$ 2    | 9 $\pm$ 3    |
| BP395                    | 8 $\pm$ 0.7                          | 11 $\pm$ 2   | 10 $\pm$ 3   |
| BP488                    | 4 $\pm$ 0.7                          | 5 $\pm$ 1    | 13 $\pm$ 5   |
| BP398                    | 5 $\pm$ 0.5                          | 9 $\pm$ 2    | 11 $\pm$ 4   |
| BP489                    | 2 $\pm$ 0.5                          | 6 $\pm$ 2    | 11 $\pm$ 1   |
| BP399                    | 5 $\pm$ 0.8                          | 8 $\pm$ 2    | 10 $\pm$ 3   |
| BP490                    | 4 $\pm$ 0.7                          | 6 $\pm$ 2    | 11 $\pm$ 3   |
| BP400                    | 7 $\pm$ 1                            | 11 $\pm$ 2   | 15 $\pm$ 4   |
| BP497                    | 5 $\pm$ 1                            | 18 $\pm$ 1   | 18 $\pm$ 0   |
| BP402                    | 4 $\pm$ 1                            | 10 $\pm$ 2   | 9 $\pm$ 2    |
| BP476                    | 3 $\pm$ 0.6                          | 3 $\pm$ 0.5  | 5 $\pm$ 0.5  |

<sup>a</sup>For each group of peptides, the top sequence corresponds to the all-L derivative

<sup>b</sup>Effect on the size of the lesion in infiltrated tobacco leaves plus confidence interval

## 2. Synthesis of lipopeptides

### **C<sub>5</sub>H<sub>11</sub>CO-Lys-Lys-Leu-D-Phe-Lys-Lys-Ile-Leu-Lys-Tyr-Leu-NH<sub>2</sub> (BP472)**

This lipopeptide was prepared following the procedure described in the manuscript using hexanoic acid. Acidolytic cleavage of the resulting resin and purification eluting with H<sub>2</sub>O/CH<sub>3</sub>CN (75:25) afforded C<sub>5</sub>H<sub>11</sub>CO-Lys-Lys-Leu-D-Phe-Lys-Lys-Ile-Leu-Lys-Tyr-Leu-NH<sub>2</sub> (**BP472**) in >99% purity. *t<sub>R</sub>* = 6.14 min. MS (ESI) *m/z*: 760.1 [M + 2H]<sup>2+</sup>, 1519.1 [M + H]<sup>+</sup>; HRMS (ESI) *m/z*: calcd for C<sub>78</sub>H<sub>137</sub>N<sub>17</sub>O<sub>13</sub> [M + 2H]<sup>2+</sup> 760.0285, found 760.0260; calcd for C<sub>78</sub>H<sub>136</sub>N<sub>17</sub>O<sub>13</sub> [M + H]<sup>+</sup> 1519.0498, found 1519.0511.

### **Ac-Lys-Lys-Leu-D-Phe-Lys-Lys(COC<sub>3</sub>H<sub>7</sub>)-Ile-Leu-Lys-Tyr-Leu-NH<sub>2</sub> (BP473)**

This lipopeptide was prepared following the procedure described in the manuscript using butyric acid. Acidolytic cleavage of the resulting resin and purification eluting with H<sub>2</sub>O/CH<sub>3</sub>CN (75:25) afforded Ac-Lys-Lys-Leu-D-Phe-Lys-Lys(COC<sub>3</sub>H<sub>7</sub>)-Ile-Leu-Lys-Tyr-Leu-NH<sub>2</sub> (**BP473**) in >99% purity. *t<sub>R</sub>* = 5.99 min. MS (ESI) *m/z*: 767.1 [M + 2H]<sup>2+</sup>, 1533.1 [M + H]<sup>+</sup>, 1555.1 [M + Na]<sup>+</sup>; HRMS (ESI) *m/z*: calcd for C<sub>78</sub>H<sub>135</sub>N<sub>17</sub>O<sub>14</sub> [M + 2H]<sup>2+</sup> 767.0182, found 767.0158; calcd for C<sub>78</sub>H<sub>134</sub>N<sub>17</sub>O<sub>14</sub> [M + H]<sup>+</sup> 1533.0291, found 1533.0240.

### **Ac-Lys-Lys-Leu-D-Phe-Lys-Lys-Ile-Lys(COC<sub>3</sub>H<sub>7</sub>)-Lys-Tyr-Leu-NH<sub>2</sub> (BP474)**

This lipopeptide was prepared following the procedure described in the manuscript using butyric acid. Acidolytic cleavage of the resulting resin and purification eluting with H<sub>2</sub>O/CH<sub>3</sub>CN (85:15) afforded Ac-Lys-Lys-Leu-D-Phe-Lys-Lys-Ile-Lys(COC<sub>3</sub>H<sub>7</sub>)-Lys-Tyr-Leu-NH<sub>2</sub> (**BP474**) in >99% purity. *t<sub>R</sub>* = 5.36 min. MS (ESI) *m/z*: 774.6 [M + 2H]<sup>2+</sup>, 1548.1 [M + H]<sup>+</sup>, 1570.1 [M + Na]<sup>+</sup>; HRMS (ESI) *m/z*: calcd for C<sub>78</sub>H<sub>136</sub>N<sub>18</sub>O<sub>14</sub> [M + 2H]<sup>2+</sup> 774.5236, found 774.5208; calcd for C<sub>78</sub>H<sub>135</sub>N<sub>18</sub>O<sub>14</sub> [M + H]<sup>+</sup> 1548.0400, found 1548.0381.

### **Ac-Lys-Lys-Leu-D-Phe-Lys-Lys-Ile-Leu-Lys-Lys(COC<sub>3</sub>H<sub>7</sub>)-Leu-NH<sub>2</sub> (BP475)**

This lipopeptide was prepared following the procedure described in the manuscript using butyric acid. Acidolytic cleavage of the resulting resin and purification eluting with H<sub>2</sub>O/CH<sub>3</sub>CN (80:20) afforded

Ac-Lys-Lys-Leu-D-Phe-Lys-Lys-Ile-Leu-Lys-Lys(COC<sub>3</sub>H<sub>7</sub>)-Leu-NH<sub>2</sub> (**BP475**) in >99% purity.  $t_R$  = 5.69 min. MS (ESI)  $m/z$ : 750.1 [M + 2H]<sup>2+</sup>, 1498.2 [M + H]<sup>+</sup>, 1520.1 [M + Na]<sup>+</sup>; HRMS (ESI)  $m/z$ : calcd for C<sub>75</sub>H<sub>138</sub>N<sub>18</sub>O<sub>13</sub> [M + 2H]<sup>2+</sup> 749.5340, found 749.5343; calcd for C<sub>75</sub>H<sub>137</sub>N<sub>18</sub>O<sub>13</sub> [M + H]<sup>+</sup> 1498.0607, found 1498.0610; calcd for C<sub>75</sub>H<sub>136</sub>N<sub>18</sub>O<sub>13</sub>Na [M + Na]<sup>+</sup> 1520.0426, found 1520.0424.

**Ac-Lys-Lys-Leu-D-Phe-Lys-Lys-Ile-Leu-Lys-Tyr-Lys(COC<sub>11</sub>H<sub>23</sub>)-NH<sub>2</sub> (BP476)**

This lipopeptide was prepared following the procedure described in the manuscript using lauric acid. Acidolytic cleavage of the resulting resin and purification eluting with H<sub>2</sub>O/CH<sub>3</sub>CN (80:20) afforded Ac-Lys-Lys-Leu-D-Phe-Lys-Lys-Ile-Leu-Lys-Tyr-Lys(COC<sub>11</sub>H<sub>23</sub>)-NH<sub>2</sub> (**BP476**) in >99% purity.  $t_R$  = 6.67 min. MS (ESI)  $m/z$ : 830.6 [M + 2H]<sup>2+</sup>, 1660.3 [M + H]<sup>+</sup>, 1682.2 [M + Na]<sup>+</sup>; HRMS (ESI)  $m/z$ : calcd for C<sub>86</sub>H<sub>152</sub>N<sub>18</sub>O<sub>14</sub> [M + 2H]<sup>2+</sup> 830.5862, found 830.5839; calcd for C<sub>86</sub>H<sub>151</sub>N<sub>18</sub>O<sub>14</sub> [M + H]<sup>+</sup> 1660.1652, found 1660.1578.

**Ac-Lys-Lys-Leu-D-Lys(COC<sub>5</sub>H<sub>11</sub>)-Lys-Lys-Ile-Leu-Lys-Tyr-Leu-NH<sub>2</sub> (BP484)**

This lipopeptide was prepared following the procedure described in the manuscript using hexanoic acid. Acidolytic cleavage of the resulting resin and purification eluting with H<sub>2</sub>O/CH<sub>3</sub>CN (80:20) afforded Ac-Lys-Lys-Leu-D-Lys(COC<sub>5</sub>H<sub>11</sub>)-Lys-Lys-Ile-Leu-Lys-Tyr-Leu-NH<sub>2</sub> (**BP484**) in >99% purity.  $t_R$  = 6.45 min. MS (ESI)  $m/z$ : 771.5 [M + 2H]<sup>2+</sup>, 1542.0 [M + H]<sup>+</sup>; HRMS (ESI)  $m/z$ : calcd for C<sub>77</sub>H<sub>142</sub>N<sub>18</sub>O<sub>14</sub> [M + 2H]<sup>2+</sup> 771.5471, found 771.5477; calcd for C<sub>77</sub>H<sub>141</sub>N<sub>18</sub>O<sub>14</sub> [M + H]<sup>+</sup> 1542.0869, found 1542.0812.

**C<sub>3</sub>H<sub>7</sub>CO-Lys-Lys-Leu-D-Phe-Lys-Lys-Ile-Leu-Lys-Tyr-Leu-NH<sub>2</sub> (BP485)**

This lipopeptide was prepared following the procedure described in the manuscript using butyric acid. Acidolytic cleavage of the resulting resin and purification eluting with H<sub>2</sub>O/CH<sub>3</sub>CN (75:25) afforded C<sub>3</sub>H<sub>7</sub>CO-Lys-Lys-Leu-D-Phe-Lys-Lys-Ile-Leu-Lys-Tyr-Leu-NH<sub>2</sub> (**BP485**) in >99% purity.  $t_R$  = 6.79 min. MS (ESI)  $m/z$ : 746.4 [M + 2H]<sup>2+</sup>, 1491.0 [M + H]<sup>+</sup>, 1513.1 [M + Na]<sup>+</sup>; HRMS (ESI)  $m/z$ : calcd for C<sub>76</sub>H<sub>133</sub>N<sub>17</sub>O<sub>13</sub> [M + 2H]<sup>2+</sup> 746.0129, found 746.0097; calcd for C<sub>76</sub>H<sub>132</sub>N<sub>17</sub>O<sub>13</sub> [M + H]<sup>+</sup> 1491.0185, found 1491.0154.

**Ac-Lys-Lys(COC<sub>3</sub>H<sub>7</sub>)-Leu-D-Phe-Lys-Lys-Ile-Leu-Lys-Tyr-Leu-NH<sub>2</sub> (BP486)**

This lipopeptide was prepared following the procedure described in the manuscript using butyric acid. Acidolytic cleavage of the resulting resin and purification eluting with H<sub>2</sub>O/CH<sub>3</sub>CN (75:25) afforded Ac-Lys-Lys(COC<sub>3</sub>H<sub>7</sub>)-Leu-D-Phe-Lys-Lys-Ile-Leu-Lys-Tyr-Leu-NH<sub>2</sub> (**BP486**) in >99% purity.  $t_R$  = 6.17 min. MS (ESI)  $m/z$ : 767.1 [M + 2H]<sup>2+</sup>, 1533.1 [M + H]<sup>+</sup>; HRMS (ESI)  $m/z$ : calcd for C<sub>78</sub>H<sub>134</sub>N<sub>17</sub>O<sub>14</sub> [M + H]<sup>+</sup> 1533.0291, found 1533.0266; calcd for C<sub>78</sub>H<sub>133</sub>N<sub>17</sub>O<sub>14</sub>Na [M + Na]<sup>+</sup> 1555.0110, found 1555.0071.

**Ac-Lys-Lys-Leu-D-Lys(COC<sub>11</sub>H<sub>23</sub>)-Lys-Lys-Ile-Leu-Lys-Tyr-Leu-NH<sub>2</sub> (BP488)**

This lipopeptide was prepared following the procedure described in the manuscript using lauric acid. Acidolytic cleavage of the resulting resin and purification eluting with H<sub>2</sub>O/CH<sub>3</sub>CN (75:25) afforded Ac-Lys-Lys-Leu-D-Lys(COC<sub>11</sub>H<sub>23</sub>)-Lys-Lys-Ile-Leu-Lys-Tyr-Leu-NH<sub>2</sub> (**BP488**) in >99% purity.  $t_R$  = 6.80 min. MS (ESI)  $m/z$ : 814.1 [M + 2H]<sup>2+</sup>, 1626.2 [M + H]<sup>+</sup>; HRMS (ESI)  $m/z$ : calcd for C<sub>83</sub>H<sub>153</sub>N<sub>18</sub>O<sub>14</sub> [M + H]<sup>+</sup> 1626.1808, found 1626.1787; calcd for C<sub>83</sub>H<sub>152</sub>N<sub>18</sub>O<sub>14</sub>Na [M + Na]<sup>+</sup> 1648.1628, found 1648.1600.

**Ac-Lys-Lys-Leu-D-Phe-Lys-Lys-Lys(COC<sub>11</sub>H<sub>23</sub>)-Leu-Lys-Tyr-Leu-NH<sub>2</sub> (BP489)**

This lipopeptide was prepared following the procedure described in the manuscript using lauric acid. Acidolytic cleavage of the resulting resin and purification eluting with H<sub>2</sub>O/CH<sub>3</sub>CN (75:25) afforded Ac-Lys-Lys-Leu-D-Phe-Lys-Lys-Lys(COC<sub>11</sub>H<sub>23</sub>)-Leu-Lys-Tyr-Leu-NH<sub>2</sub> (**BP489**) in >99% purity.  $t_R$  = 6.76 min. MS (ESI)  $m/z$ : 554.4 [M + 3H]<sup>3+</sup>, 831.1 [M + 2H]<sup>2+</sup>, 1660.2 [M + H]<sup>+</sup>; HRMS (ESI)  $m/z$ : calcd for C<sub>86</sub>H<sub>152</sub>N<sub>18</sub>O<sub>14</sub> [M + 2H]<sup>2+</sup> 830.5862, found 830.5825; calcd for C<sub>86</sub>H<sub>151</sub>N<sub>18</sub>O<sub>14</sub> [M + H]<sup>+</sup> 1660.1652, found 1660.1598.

**Ac-Lys-Lys-Leu-D-Phe-Lys-Lys-Ile-Lys(COC<sub>11</sub>H<sub>23</sub>)-Lys-Tyr-Leu-NH<sub>2</sub> (BP490)**

This lipopeptide was prepared following the procedure described in the manuscript using lauric acid. Acidolytic cleavage of the resulting resin and purification eluting with H<sub>2</sub>O/CH<sub>3</sub>CN (75:25) afforded Ac-Lys-Lys-Leu-D-Phe-Lys-Lys-Ile-Lys(COC<sub>11</sub>H<sub>23</sub>)-Lys-Tyr-Leu-NH<sub>2</sub> (**BP490**) in >99% purity.  $t_R$

= 7.12 min. MS (ESI)  $m/z$ : 554.4  $[M + 3H]^{3+}$ , 831.1  $[M + 2H]^{2+}$ , 1660.2  $[M + H]^+$ ; HRMS (ESI)  $m/z$ : calcd for  $C_{86}H_{151}N_{18}O_{14}$   $[M + H]^+$  1660.1652, found 1660.1635; calcd for  $C_{86}H_{150}N_{18}O_{14}Na$   $[M + Na]^+$  1682.1471, found 1682.1449.

**Ac-Lys-Lys-Leu-D-Phe-Lys-Lys-Lys(COC<sub>5</sub>H<sub>11</sub>)-Leu-Lys-Tyr-Leu-NH<sub>2</sub> (BP494)**

This lipopeptide was prepared following the procedure described in the manuscript using hexanoic acid. Acidolytic cleavage of the resulting resin and purification eluting with H<sub>2</sub>O/CH<sub>3</sub>CN (80:20) afforded Ac-Lys-Lys-Leu-D-Phe-Lys-Lys-Lys(COC<sub>5</sub>H<sub>11</sub>)-Leu-Lys-Tyr-Leu-NH<sub>2</sub> (**BP494**) in >99% purity.  $t_R$  = 5.42 min. MS (ESI)  $m/z$ : 788.6  $[M + 2H]^{2+}$ , 1576.1  $[M + H]^+$ ; HRMS (ESI)  $m/z$ : calcd for  $C_{80}H_{139}N_{18}O_{14}$   $[M + H]^+$  1576.0713, found 1576.0683; calcd for  $C_{80}H_{138}N_{18}O_{14}Na$   $[M + Na]^+$  1598.0532, found 1598.0490.

**Ac-Lys-Lys-Leu-D-Phe-Lys-Lys-Ile-Leu-Lys-Tyr-Lys(COC<sub>5</sub>H<sub>11</sub>)-NH<sub>2</sub> (BP495)**

This lipopeptide was prepared following the procedure described in the manuscript using hexanoic acid. Acidolytic cleavage of the resulting resin and purification eluting with H<sub>2</sub>O/CH<sub>3</sub>CN (80:20) afforded Ac-Lys-Lys-Leu-D-Phe-Lys-Lys-Ile-Leu-Lys-Tyr-Lys(COC<sub>5</sub>H<sub>11</sub>)-NH<sub>2</sub> (**BP495**) in >99% purity.  $t_R$  = 5.44 min. MS (ESI)  $m/z$ : 789.1  $[M + 2H]^{2+}$ , 1576.1  $[M + H]^+$ ; HRMS (ESI)  $m/z$ : calcd for  $C_{80}H_{139}N_{18}O_{14}$   $[M + H]^+$  1576.0713, found 1576.0683; calcd for  $C_{80}H_{138}N_{18}O_{14}Na$   $[M + Na]^+$  1598.0532, found 1598.0499.

**Ac-Lys-Lys-Leu-D-Phe-Lys-Lys-Ile-Leu-Lys-Tyr-Lys(COC<sub>3</sub>H<sub>7</sub>)-NH<sub>2</sub> (BP496)**

This lipopeptide was prepared following the procedure described in the manuscript using butyric acid. Acidolytic cleavage of the resulting resin and purification eluting with H<sub>2</sub>O/CH<sub>3</sub>CN (80:20) afforded Ac-Lys-Lys-Leu-D-Phe-Lys-Lys-Ile-Leu-Lys-Tyr-Lys(COC<sub>3</sub>H<sub>7</sub>)-NH<sub>2</sub> (**BP496**) in >99% purity.  $t_R$  = 5.11 min. MS (ESI)  $m/z$ : 775.1  $[M + 2H]^{2+}$ , 1548.2  $[M + H]^+$ , 1570.1  $[M + Na]^+$ ; HRMS (ESI)  $m/z$ : calcd for  $C_{86}H_{135}N_{18}O_{14}$   $[M + H]^+$  1548.0400, found 1548.0367; calcd for  $C_{78}H_{134}N_{18}O_{14}Na$   $[M + Na]^+$  1570.0219, found 1570.0179.



**Ac-Lys-Lys-Leu-D-Phe-Lys-Lys-Ile-Leu-Lys(COC<sub>11</sub>H<sub>23</sub>)-Tyr-Leu-NH<sub>2</sub> (BP497)**

This lipopeptide was prepared following the procedure described in the manuscript using lauric acid. Acidolytic cleavage of the resulting resin and purification eluting with H<sub>2</sub>O/CH<sub>3</sub>CN (75:25) afforded Ac-Lys-Lys-Leu-D-Phe-Lys-Lys-Ile-Leu-Lys(COC<sub>11</sub>H<sub>23</sub>)-Tyr-Leu-NH<sub>2</sub> (**BP497**) in >99% purity.  $t_R$  = 7.21 min. MS (ESI)  $m/z$ : 823.1 [M + 2H]<sup>2+</sup>, 1645.1 [M + H]<sup>+</sup>; HRMS (ESI)  $m/z$ : calcd for C<sub>86</sub>H<sub>150</sub>N<sub>17</sub>O<sub>14</sub> [M + H]<sup>+</sup> 1645.1543, found 1645.1516; calcd for C<sub>86</sub>H<sub>149</sub>N<sub>17</sub>O<sub>14</sub>Na [M + Na]<sup>+</sup> 1667.1362, found 1667.1311.

**Ac-Lys-Lys-Leu-D-Phe-Lys(COC<sub>3</sub>H<sub>7</sub>)-Lys-Ile-Leu-Lys-Tyr-Leu-NH<sub>2</sub> (BP498)**

This lipopeptide was prepared following the procedure described in the manuscript using butyric acid. Acidolytic cleavage of the resulting resin and purification eluting with H<sub>2</sub>O/CH<sub>3</sub>CN (70:30) afforded Ac-Lys-Lys-Leu-D-Phe-Lys(COC<sub>3</sub>H<sub>7</sub>)-Lys-Ile-Leu-Lys-Tyr-Leu-NH<sub>2</sub> (**BP498**) in >99% purity.  $t_R$  = 6.12 min. MS (ESI)  $m/z$ : 767.0 [M + 2H]<sup>2+</sup>, 1533.1 [M + H]<sup>+</sup>; HRMS (ESI)  $m/z$ : calcd for C<sub>78</sub>H<sub>135</sub>N<sub>17</sub>O<sub>14</sub> [M + 2H]<sup>2+</sup> 767.0182, found 767.0147; calcd for C<sub>78</sub>H<sub>134</sub>N<sub>17</sub>O<sub>14</sub> [M + H]<sup>+</sup> 1533.0291, found 1533.0225; calcd for C<sub>78</sub>H<sub>133</sub>N<sub>17</sub>O<sub>14</sub>Na [M + Na]<sup>+</sup> 1555.0110, found 1555.0032.

**Ac-Lys-Lys-Leu-D-Phe-Lys-Lys-Ile-Leu-Lys(COC<sub>3</sub>H<sub>7</sub>)-Tyr-Leu-NH<sub>2</sub> (BP499)**

This lipopeptide was prepared following the procedure described in the manuscript using butyric acid. Acidolytic cleavage of the resulting resin and purification eluting with H<sub>2</sub>O/CH<sub>3</sub>CN (75:25) afforded Ac-Lys-Lys-Leu-D-Phe-Lys-Lys-Ile-Leu-Lys(COC<sub>3</sub>H<sub>7</sub>)-Tyr-Leu-NH<sub>2</sub> (**BP499**) in >99% purity.  $t_R$  = 5.89 min. MS (ESI)  $m/z$ : 766.8 [M + 2H]<sup>2+</sup>, 1533.4 [M + H]<sup>+</sup>, 1555.1 [M + Na]<sup>+</sup>; HRMS (ESI)  $m/z$ : : calcd for C<sub>78</sub>H<sub>134</sub>N<sub>17</sub>O<sub>14</sub> [M + H]<sup>+</sup> 1533.0291, found 1533.0269; calcd for C<sub>78</sub>H<sub>133</sub>N<sub>17</sub>O<sub>14</sub>Na [M + Na]<sup>+</sup> 1555.0110, found 1555.0097.

**Ac-Lys-Lys-Lys(COC<sub>11</sub>H<sub>23</sub>)-D-Phe-Lys-Lys-Ile-Leu-Lys-Tyr-Leu-NH<sub>2</sub> (BP500)**

This lipopeptide was prepared following the procedure described in the manuscript using lauric acid. Acidolytic cleavage of the resulting resin and purification eluting with H<sub>2</sub>O/CH<sub>3</sub>CN (70:30) afforded Ac-Lys-Lys-Lys(COC<sub>11</sub>H<sub>23</sub>)-D-Phe-Lys-Lys-Ile-Leu-Lys-Tyr-Leu-NH<sub>2</sub> (**BP500**) in >99% purity.  $t_R$

= 6.80 min. MS (ESI)  $m/z$ : 554.4  $[M + 3H]^{3+}$ , 830.7  $[M + 2H]^{2+}$ ; HRMS (ESI)  $m/z$ : calcd for  $C_{86}H_{151}N_{18}O_{14}$   $[M + H]^+$  1661.1684, found 1661.1667; calcd for  $C_{86}H_{150}N_{18}O_{14}Na$   $[M + Na]^+$  1683.1503, found 1683.1487.

### 3. HPLC of crude and purified lipopeptides, ESI-MS and HRMS of purified lipopeptides

#### $C_5H_{11}CO$ -Lys-Lys-Leu-D-Phe-Lys-Lys-Ile-Leu-Lys-Tyr-Leu- $NH_2$ (BP472)

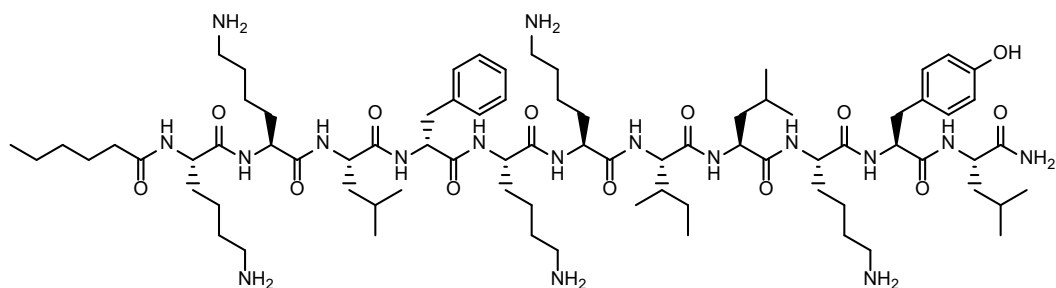

HPLC of crude peptide ( $\lambda=220$  nm)

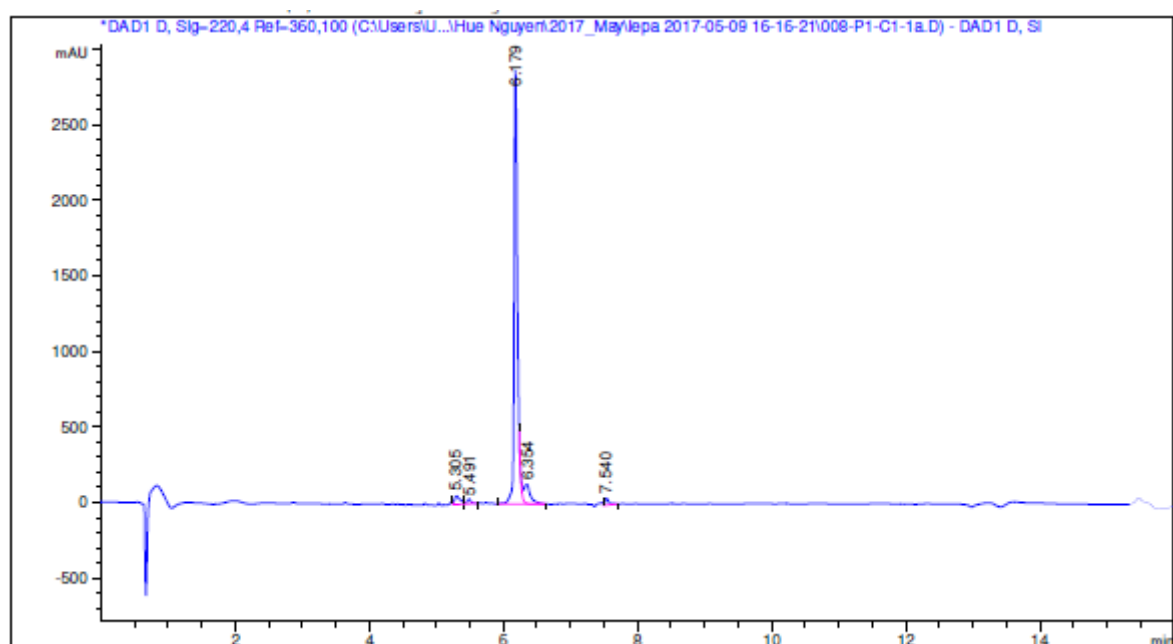

| Peak # | RetTime [min] | Type | Width [min] | Area [mAU*s] | Height [mAU] | Area %  |
|--------|---------------|------|-------------|--------------|--------------|---------|
| 1      | 5.305         | VV   | 0.0871      | 334.45099    | 54.91665     | 2.8671  |
| 2      | 5.491         | VB   | 0.0577      | 135.30244    | 32.39536     | 1.1599  |
| 3      | 6.179         | BV R | 0.0529      | 1.00572e4    | 2871.68335   | 86.2160 |
| 4      | 6.354         | VB E | 0.0962      | 953.29431    | 126.04663    | 8.1722  |
| 5      | 7.540         | VV R | 0.0572      | 184.87265    | 46.71790     | 1.5848  |

# HPLC of purified peptide ( $\lambda=220$ nm)

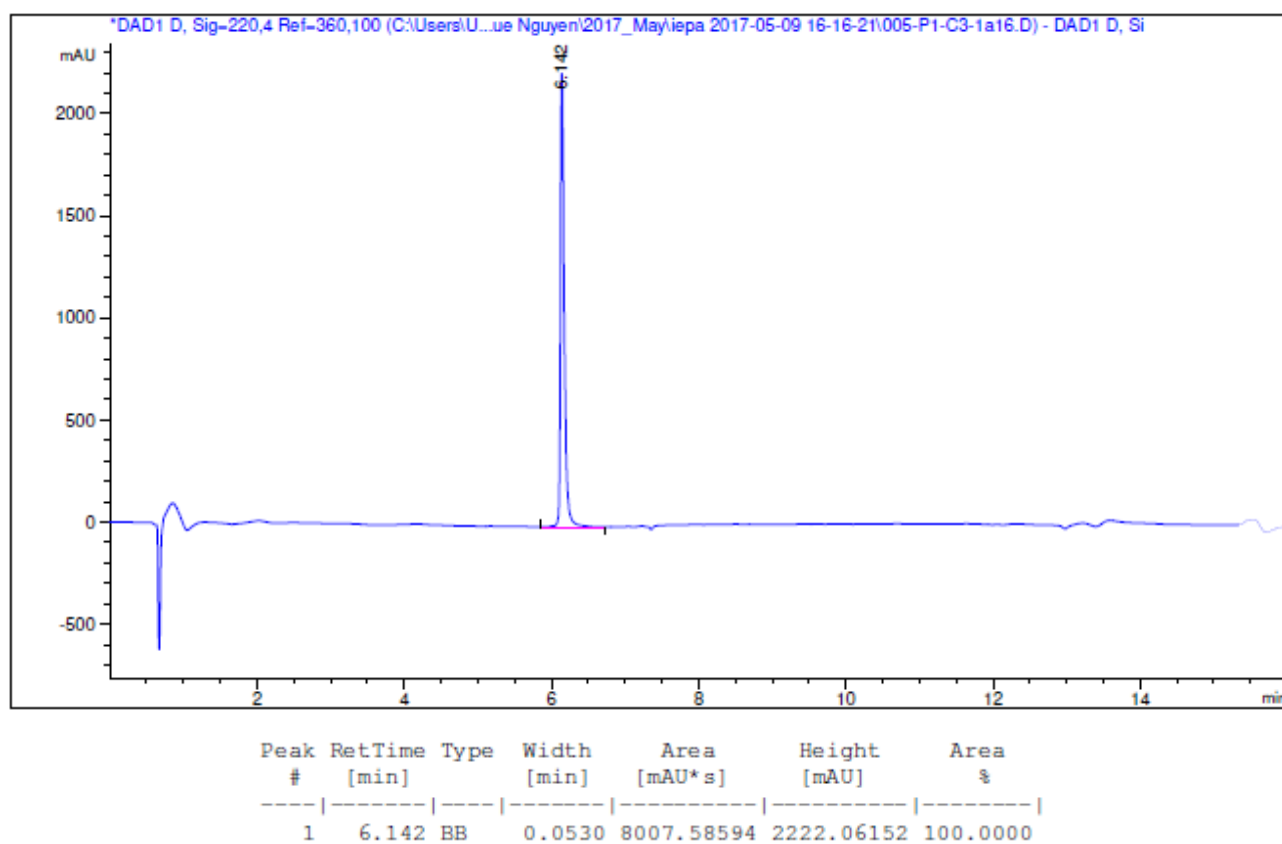

## ESI-MS ( $m/z$ )

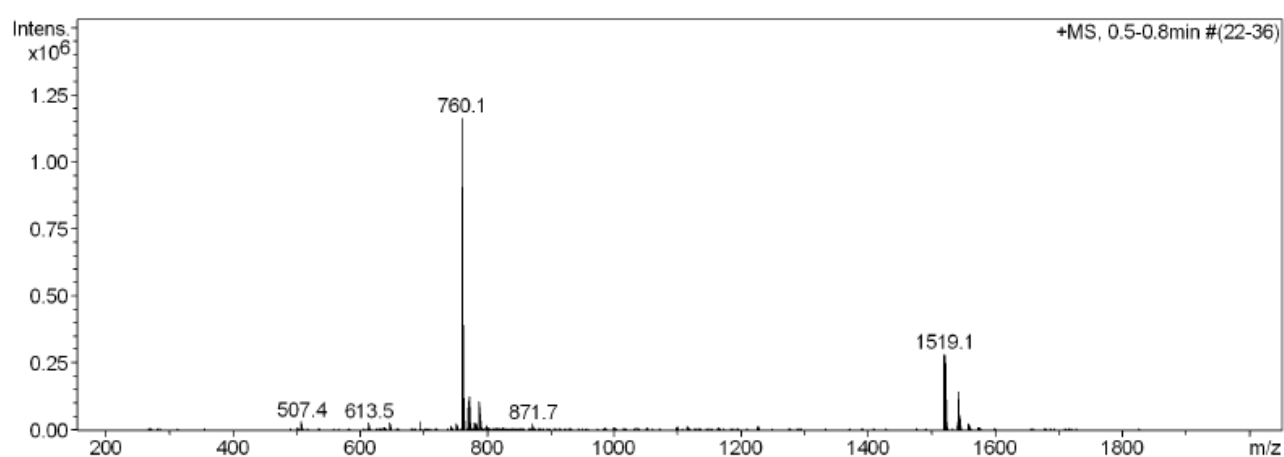

# HRMS ( $m/z$ )

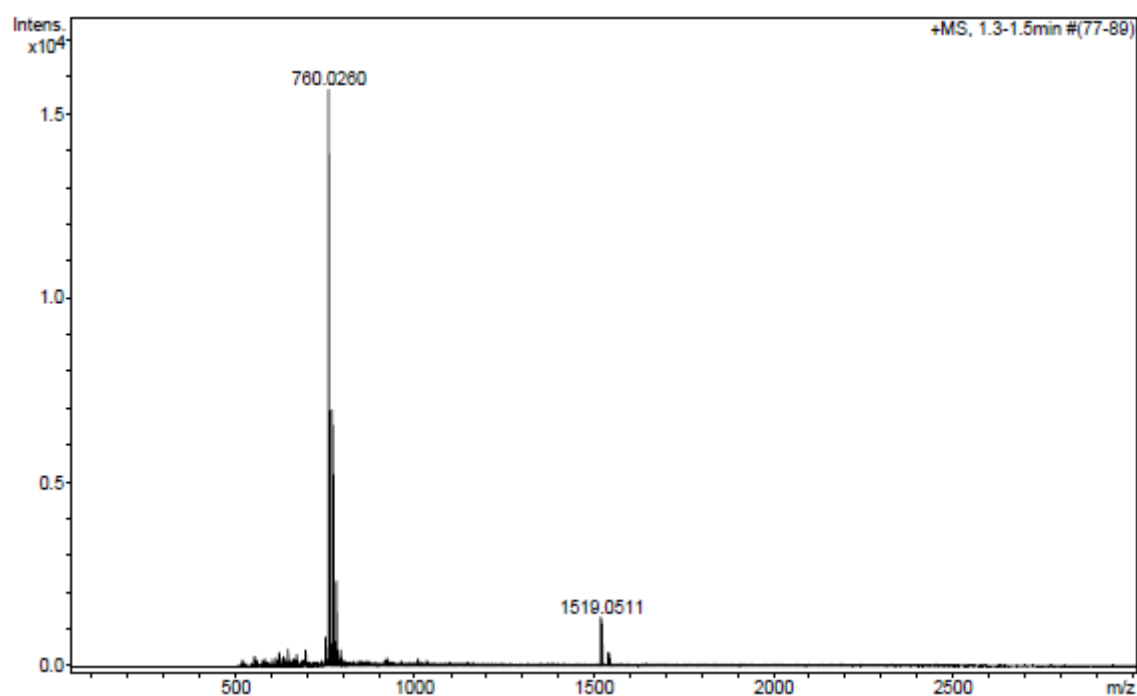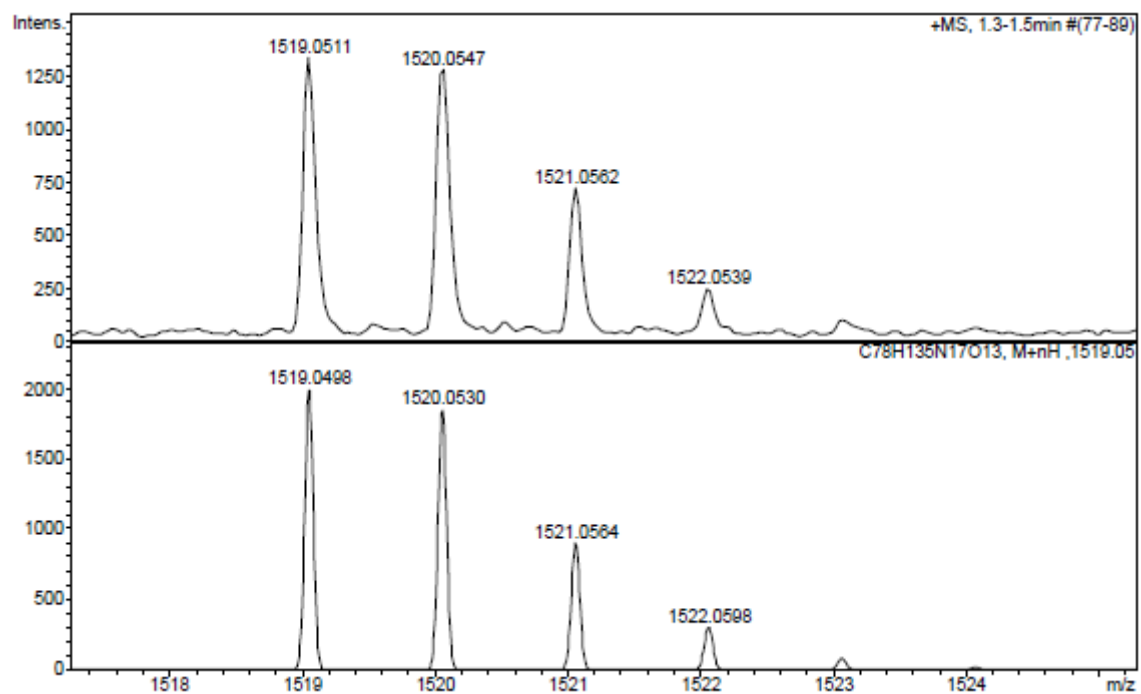

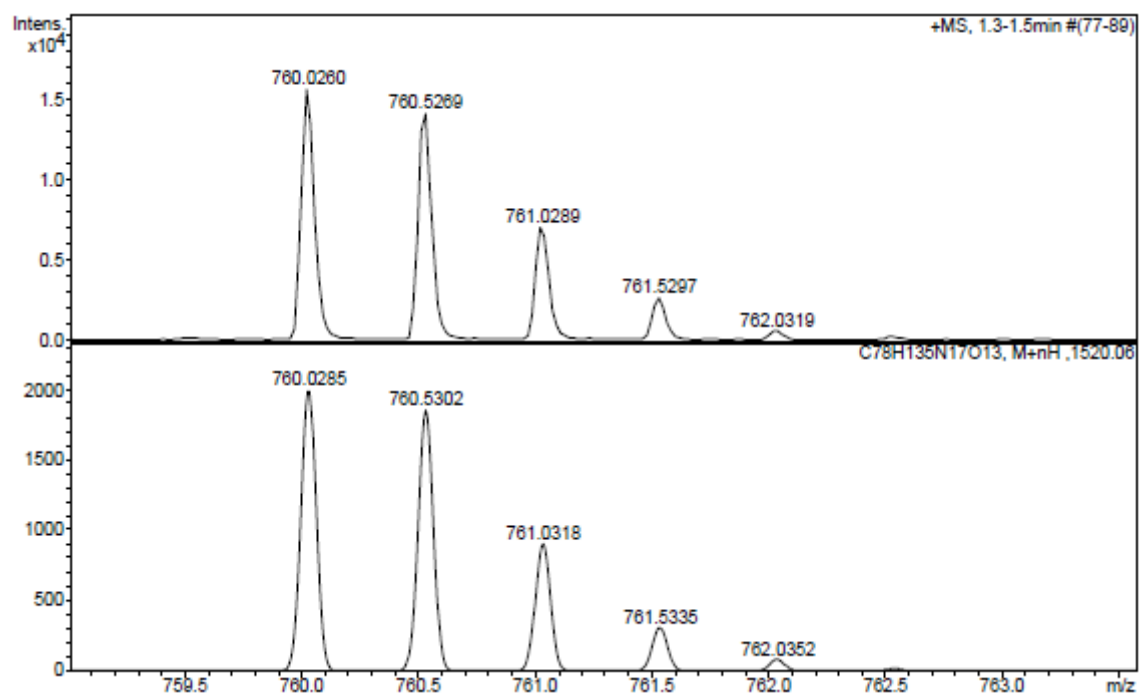

**Ac-Lys-Lys-Leu-D-Phe-Lys-Lys(COC<sub>3</sub>H<sub>7</sub>)-Ile-Leu-Lys-Tyr-Leu-NH<sub>2</sub> (BP473)**

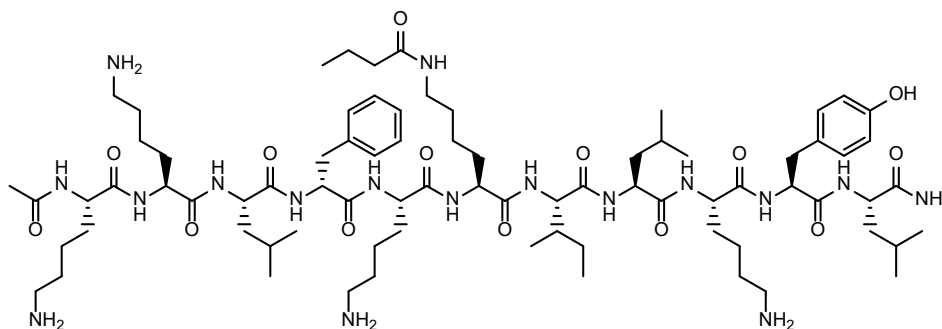

HPLC of crude peptide ( $\lambda=220$  nm)

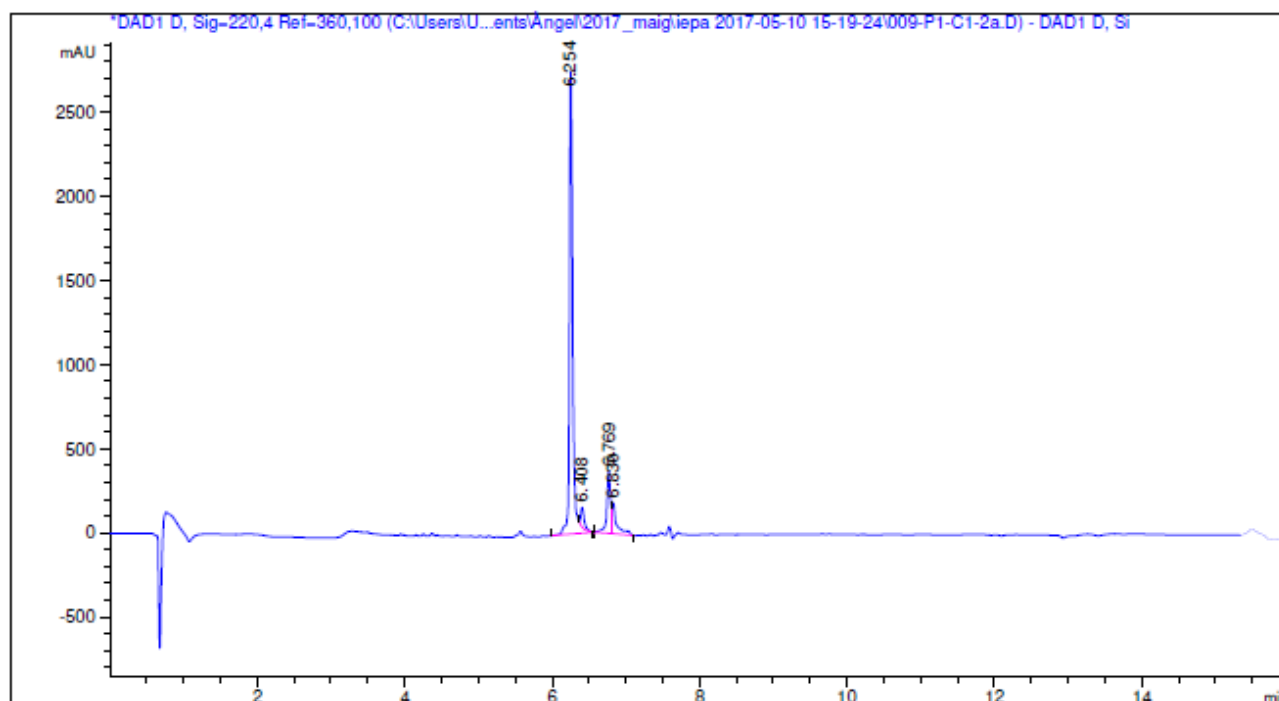

| Peak # | RetTime [min] | Type | Width [min] | Area [mAU*s] | Height [mAU] | Area %  |
|--------|---------------|------|-------------|--------------|--------------|---------|
| 1      | 6.254         | BV R | 0.0464      | 8589.29297   | 2749.92847   | 77.4871 |
| 2      | 6.408         | VB E | 0.0496      | 383.71664    | 115.83309    | 3.4616  |
| 3      | 6.769         | BV   | 0.0511      | 1300.70288   | 369.00027    | 11.7341 |
| 4      | 6.830         | WV R | 0.0589      | 811.08887    | 182.18036    | 7.3171  |

# HPLC of purified peptide ( $\lambda=220$ nm)

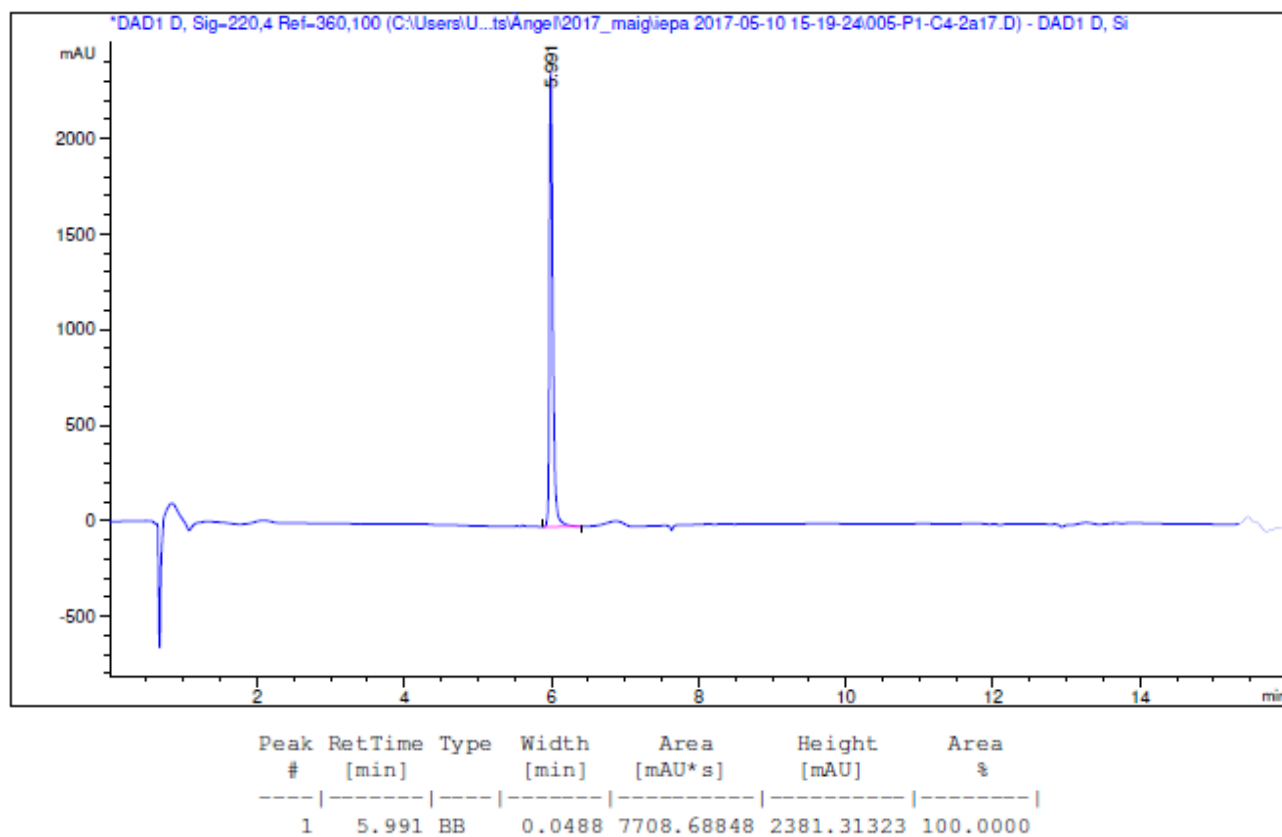

## ESI-MS ( $m/z$ )

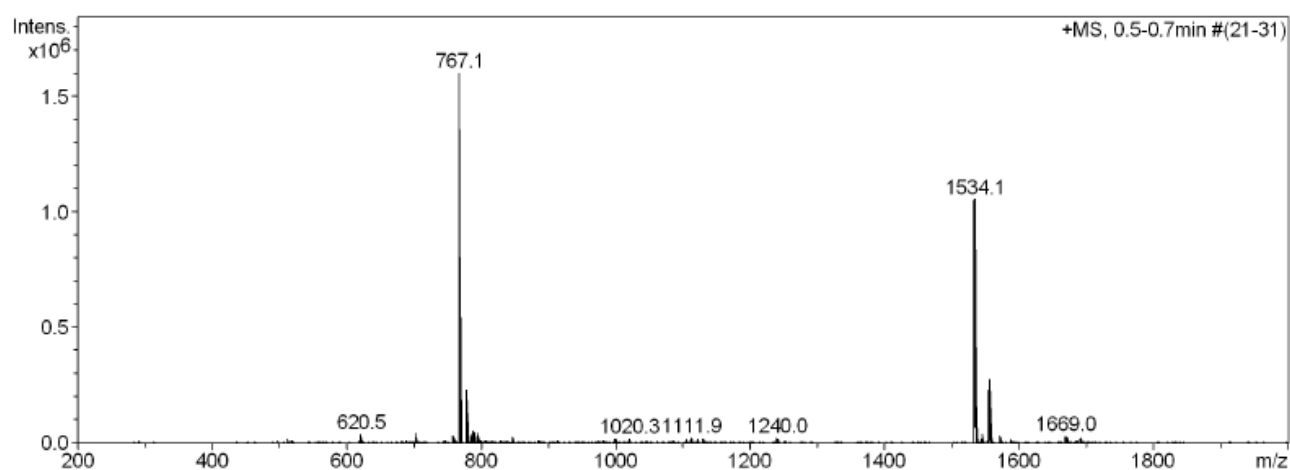



# HRMS ( $m/z$ )

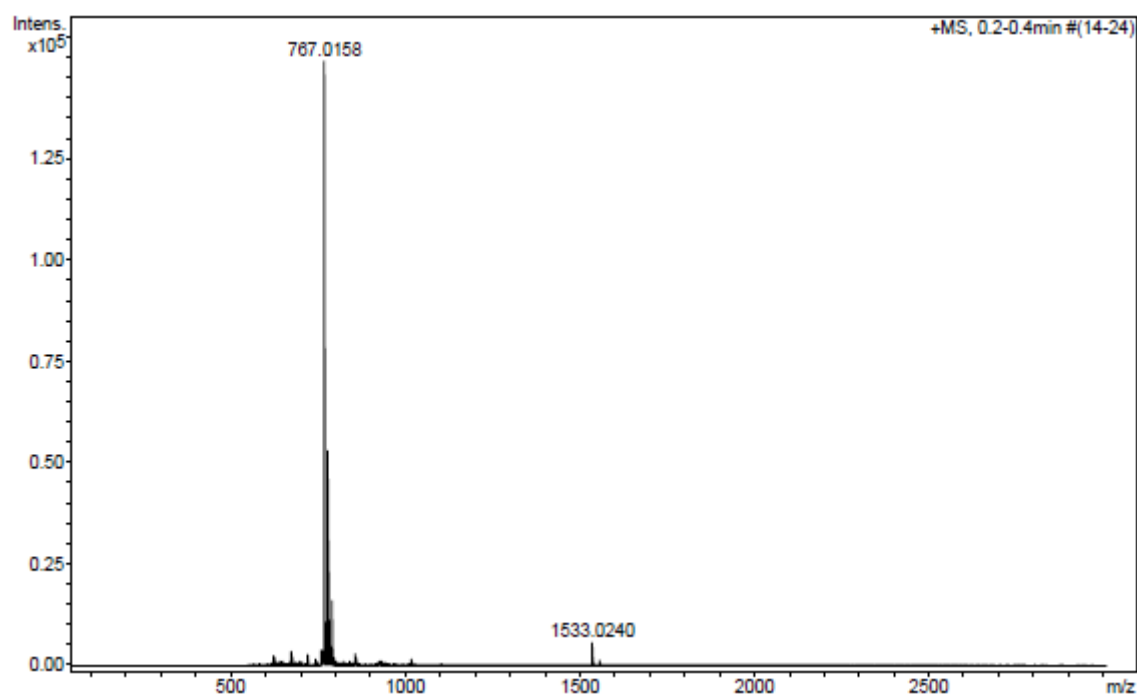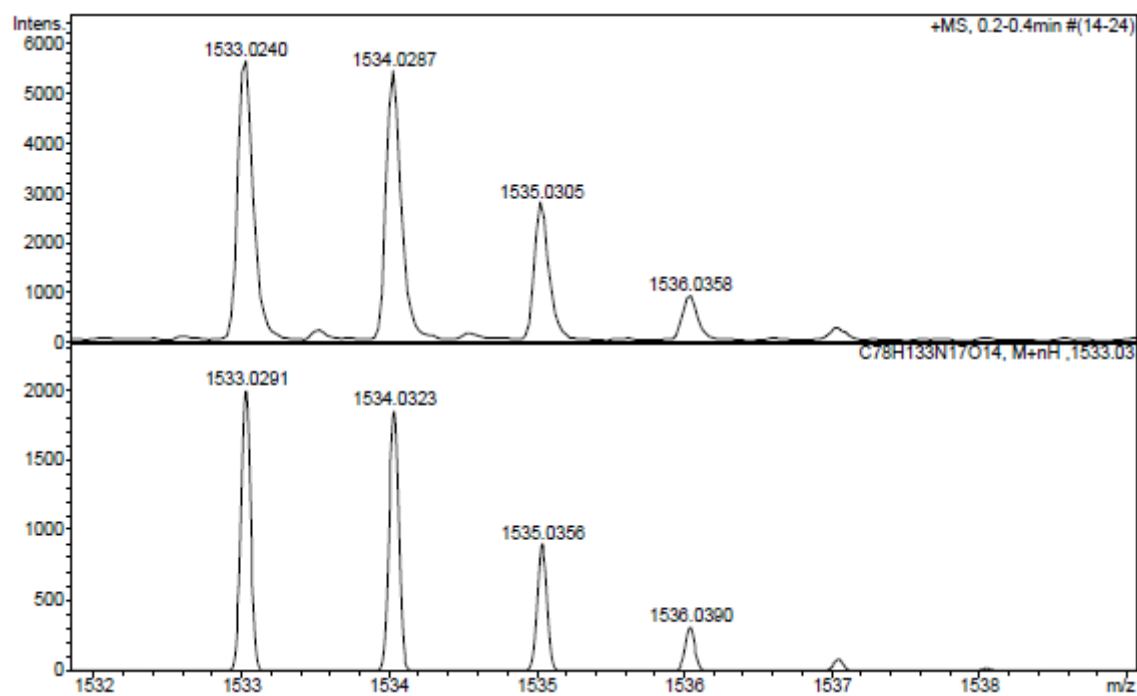

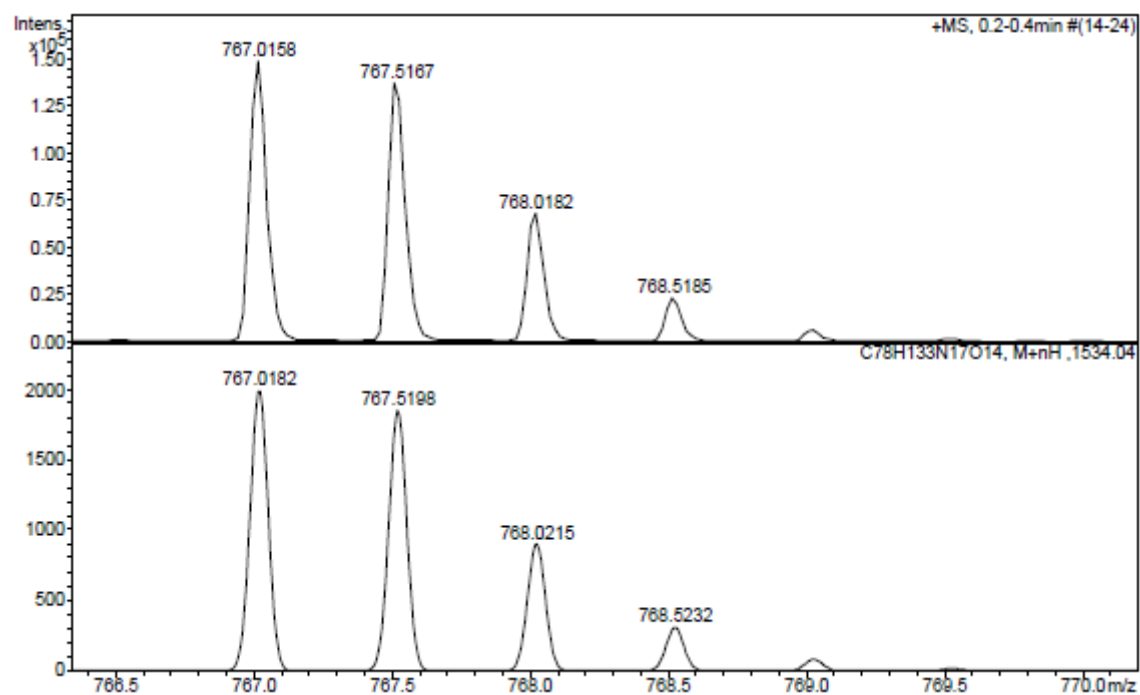

**Ac-Lys-Lys-Leu-D-Phe-Lys-Lys-Ile-Lys(COC<sub>3</sub>H<sub>7</sub>)-Lys-Tyr-Leu-NH<sub>2</sub> (BP474)**

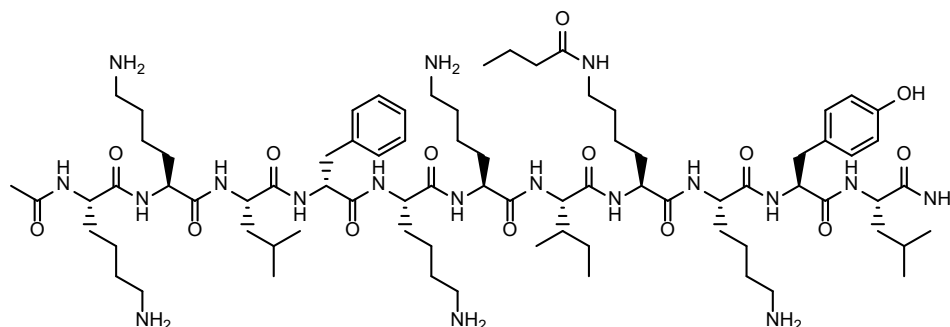

HPLC of crude peptide ( $\lambda=220$  nm)

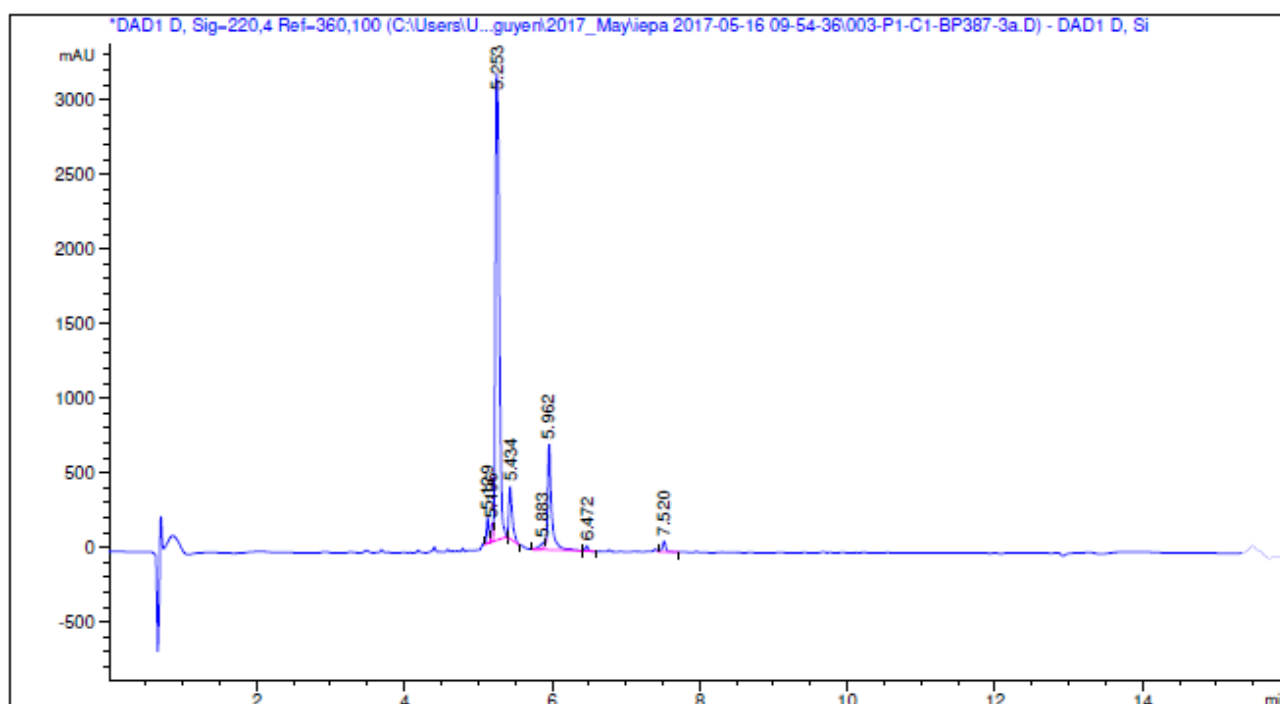

| Peak # | RetTime [min] | Type | Width [min] | Area [mAU*s] | Height [mAU] | Area %  |
|--------|---------------|------|-------------|--------------|--------------|---------|
| 1      | 5.129         | BV E | 0.0323      | 377.93021    | 181.34412    | 2.2820  |
| 2      | 5.196         | VV E | 0.0268      | 212.25146    | 119.26482    | 1.2816  |
| 3      | 5.253         | VB R | 0.0595      | 1.16522e4    | 3125.37207   | 70.3588 |
| 4      | 5.434         | BB   | 0.0460      | 1109.19092   | 349.34921    | 6.6976  |
| 5      | 5.883         | BV E | 0.0659      | 192.02771    | 38.04109     | 1.1595  |
| 6      | 5.962         | WV R | 0.0532      | 2679.02954   | 707.11737    | 16.1766 |
| 7      | 6.472         | BB   | 0.0410      | 95.51791     | 34.79841     | 0.5768  |
| 8      | 7.520         | VB R | 0.0507      | 242.96144    | 71.34217     | 1.4671  |

# HPLC of purified peptide ( $\lambda=220$ nm)

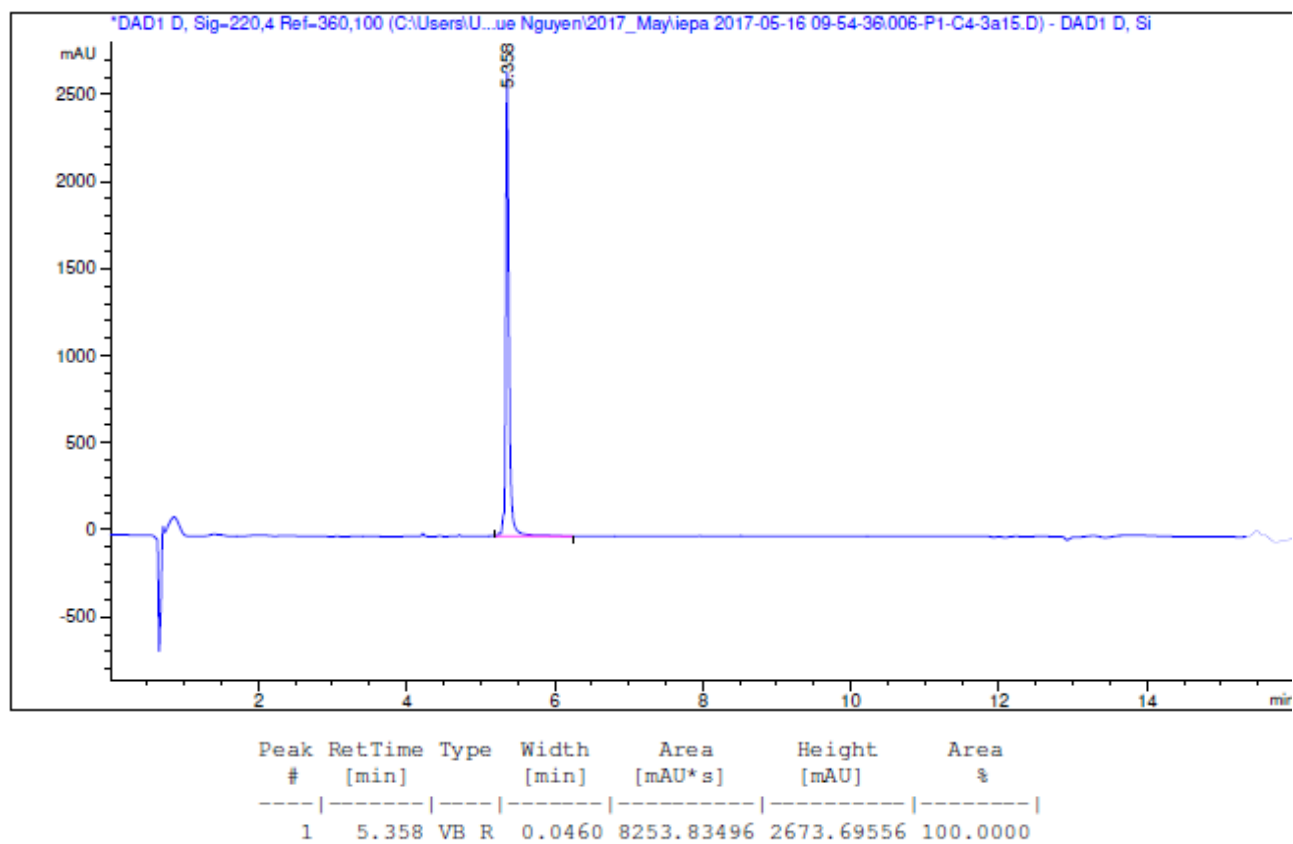

## ESI-MS ( $m/z$ )

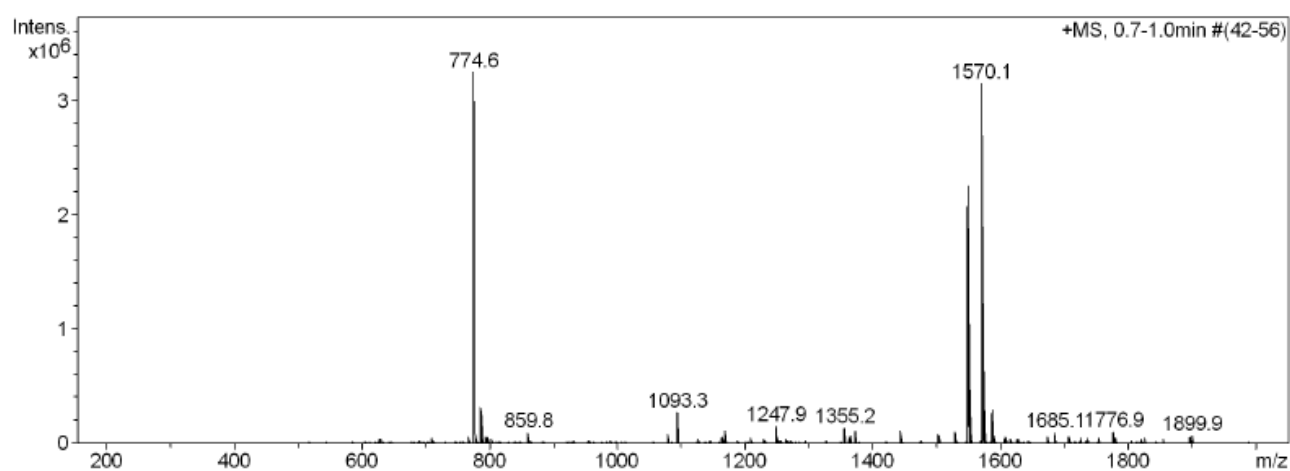

# HRMS ( $m/z$ )

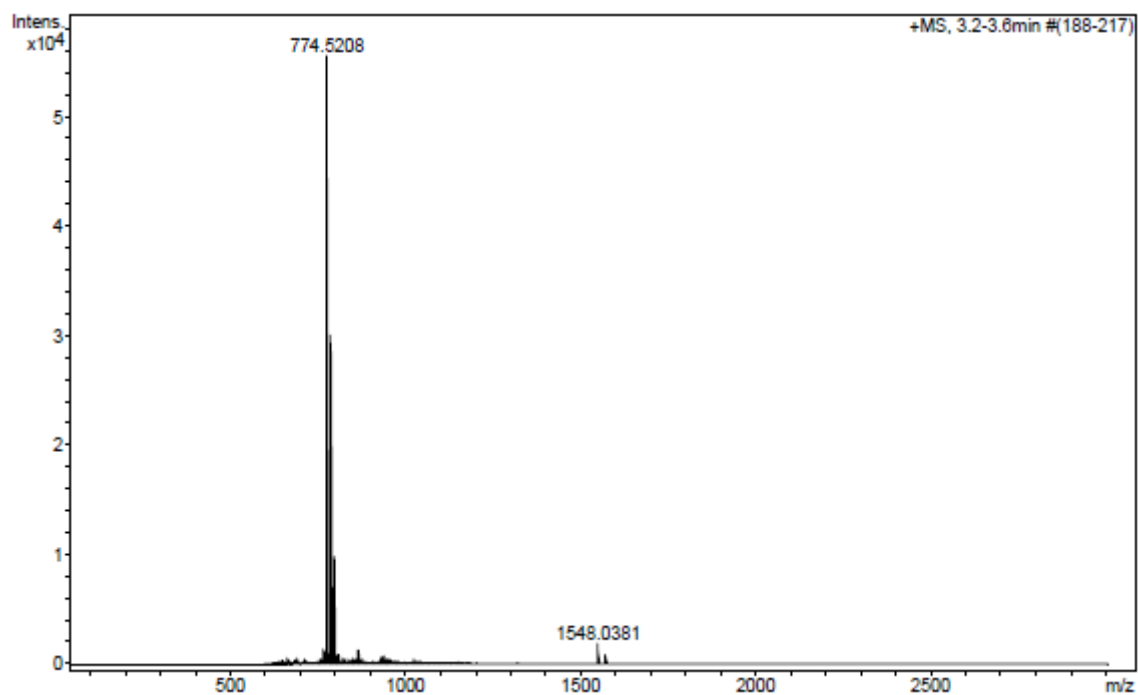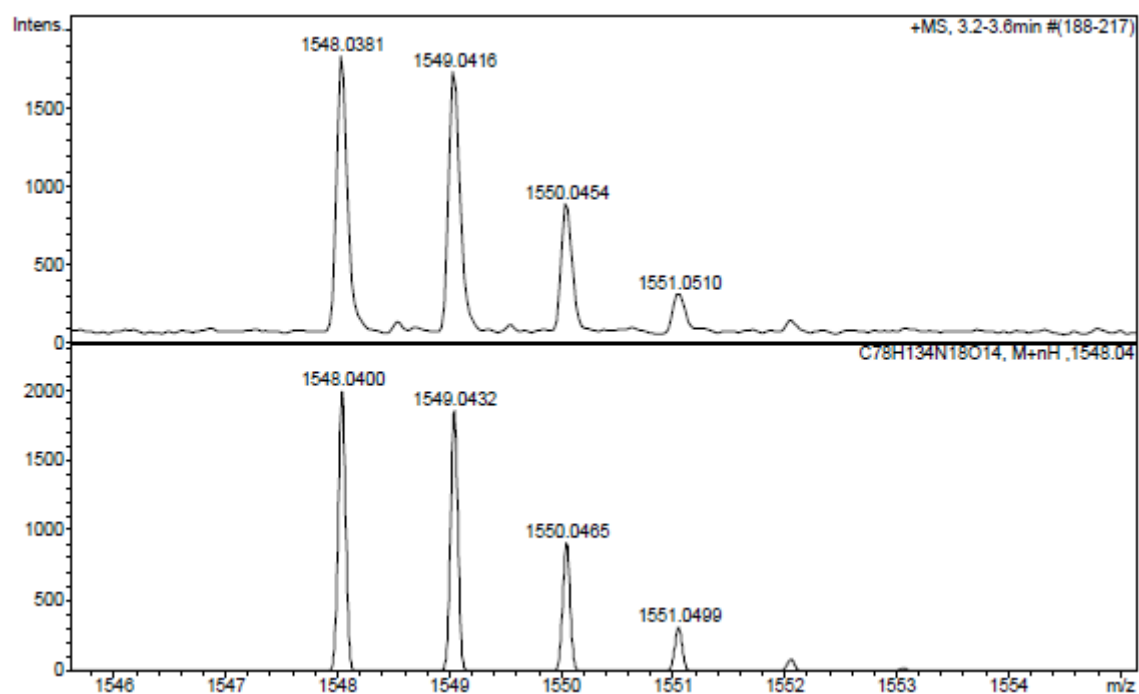

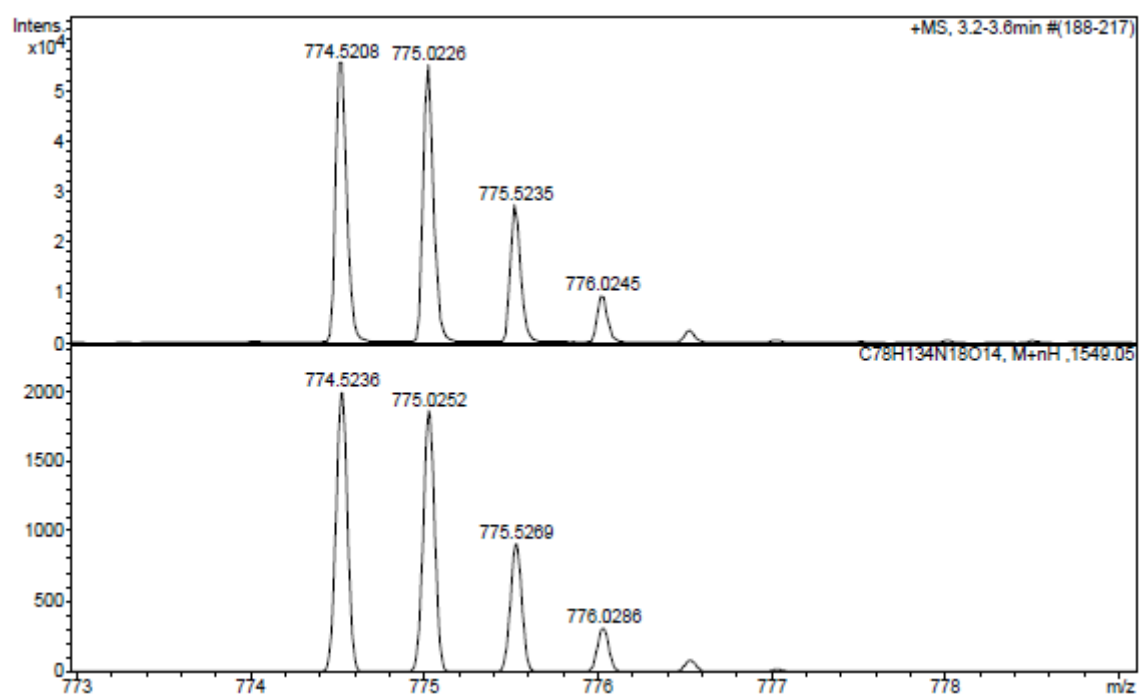

# Ac-Lys-Lys-Leu-D-Phe-Lys-Lys-Ile-Leu-Lys-Lys(COC<sub>3</sub>H<sub>7</sub>)-Leu-NH<sub>2</sub> (BP475)

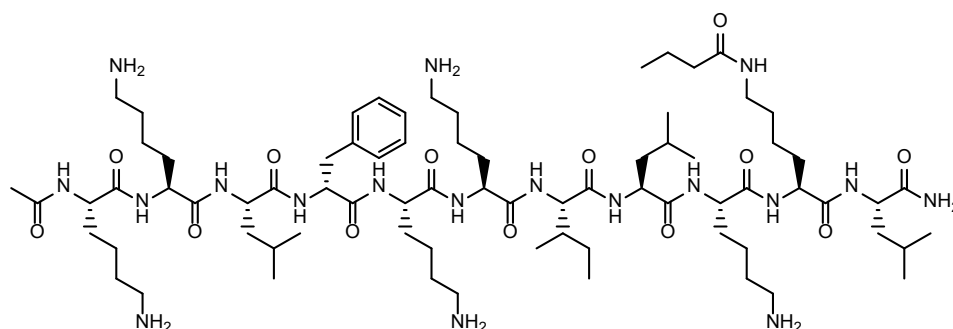

HPLC of crude peptide ( $\lambda=220$  nm)

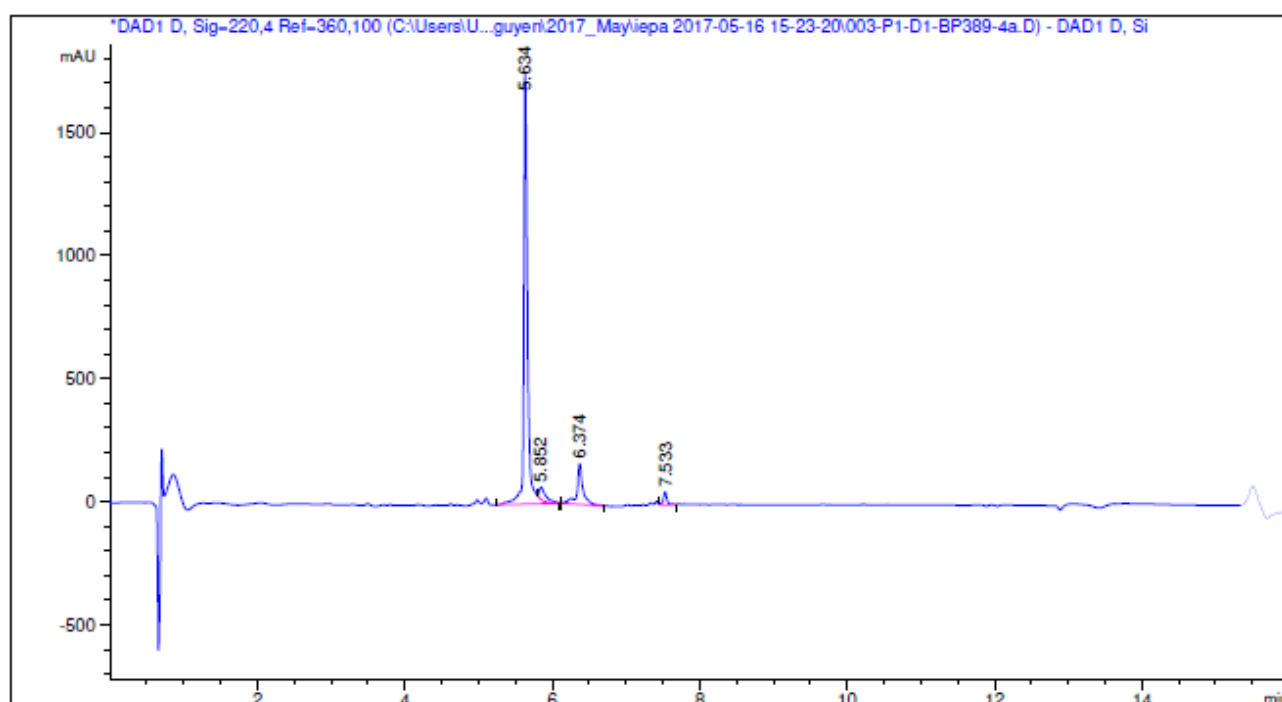

| Peak # | RetTime [min] | Type | Width [min] | Area [mAU*s] | Height [mAU] | Area %  |
|--------|---------------|------|-------------|--------------|--------------|---------|
| 1      | 5.634         | VV R | 0.0514      | 6206.26611   | 1748.02429   | 81.1357 |
| 2      | 5.852         | VB E | 0.0914      | 327.03192    | 50.62853     | 4.2753  |
| 3      | 6.374         | VB R | 0.0767      | 938.12811    | 166.53392    | 12.2643 |
| 4      | 7.533         | VV R | 0.0512      | 177.81927    | 52.87458     | 2.3247  |

# HPLC of purified peptide ( $\lambda=220$ nm)

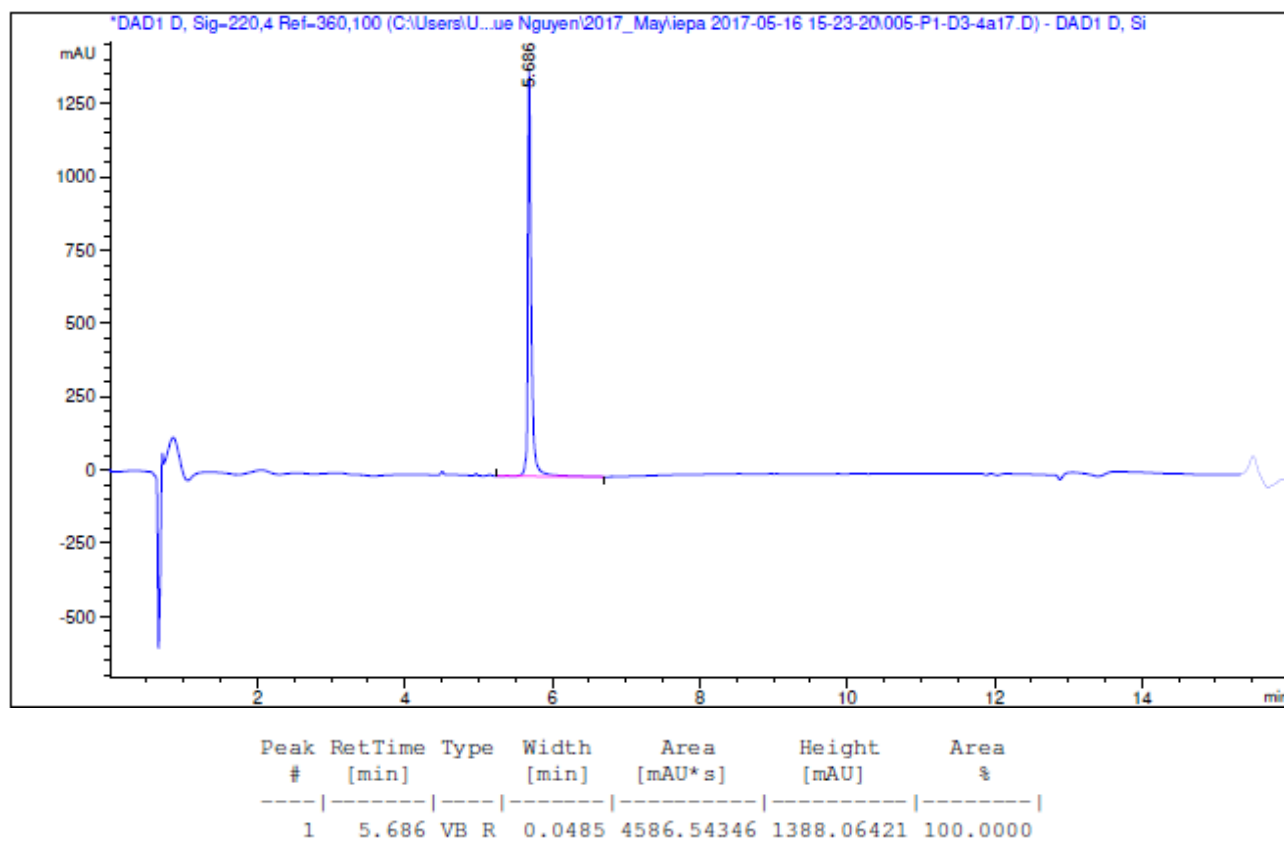

## ESI-MS ( $m/z$ )

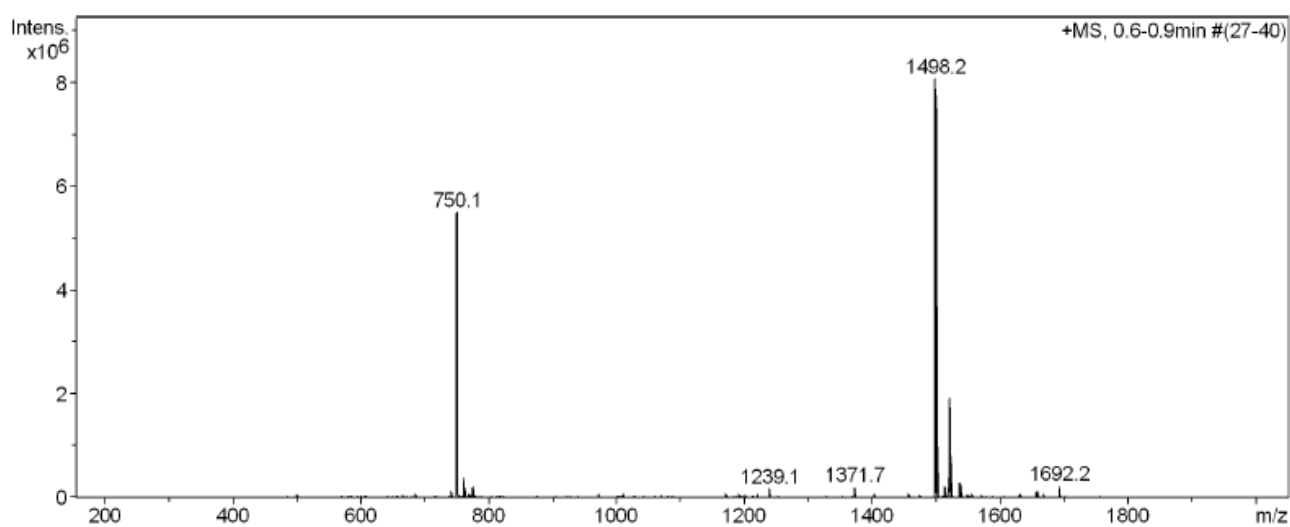



# HRMS ( $m/z$ )

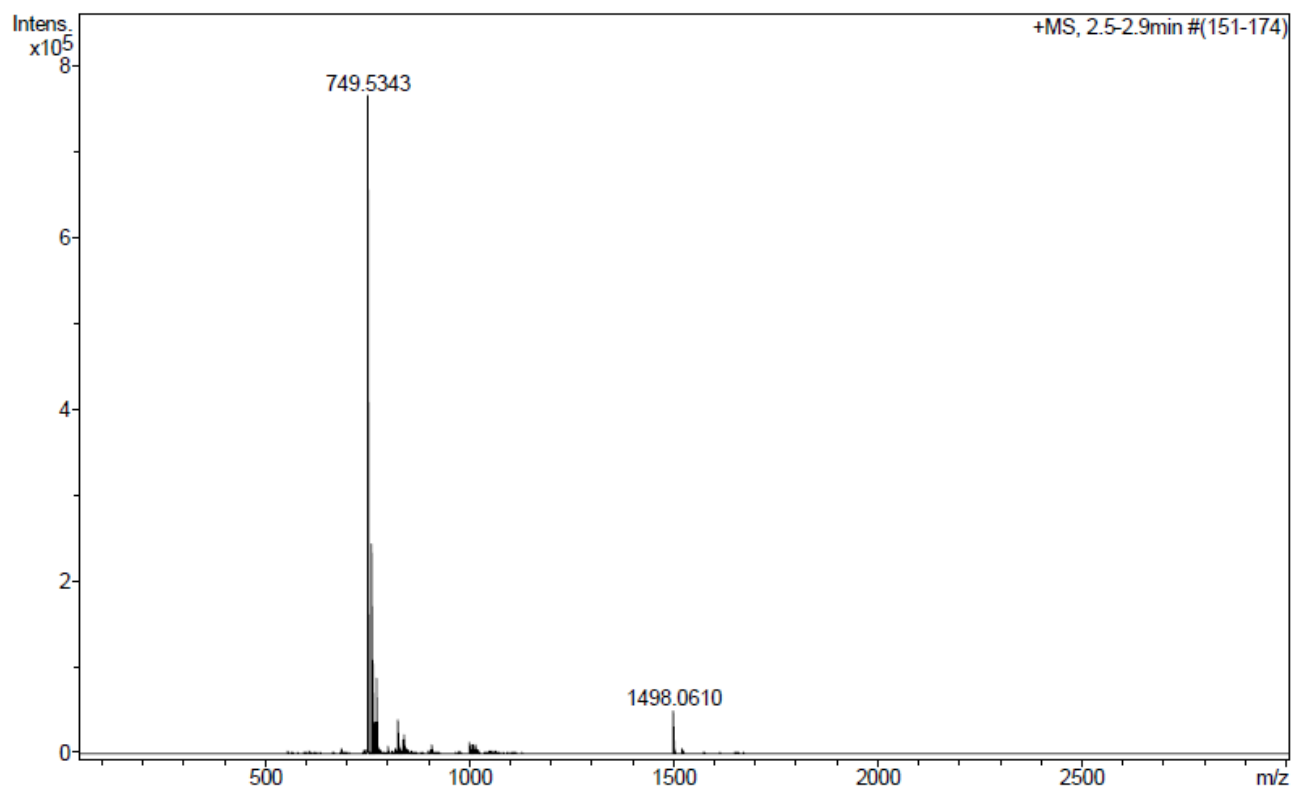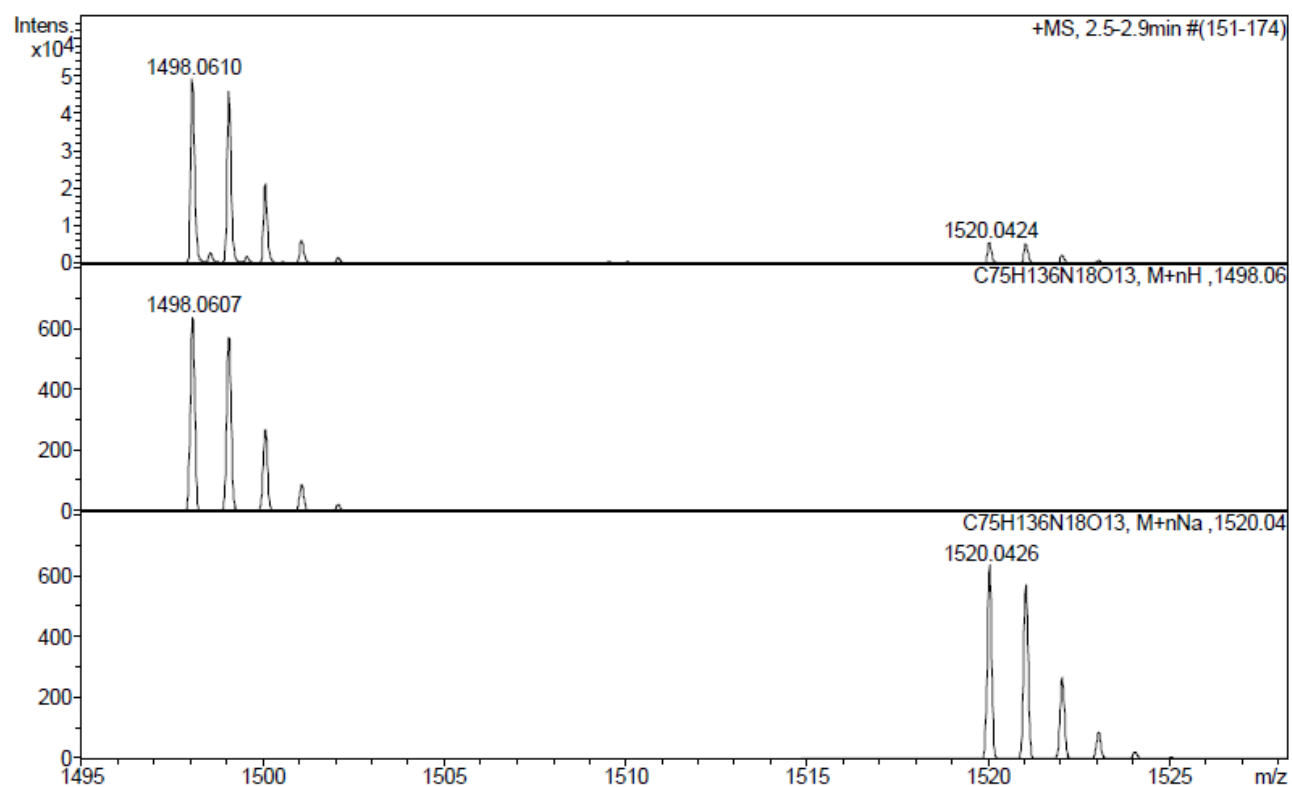

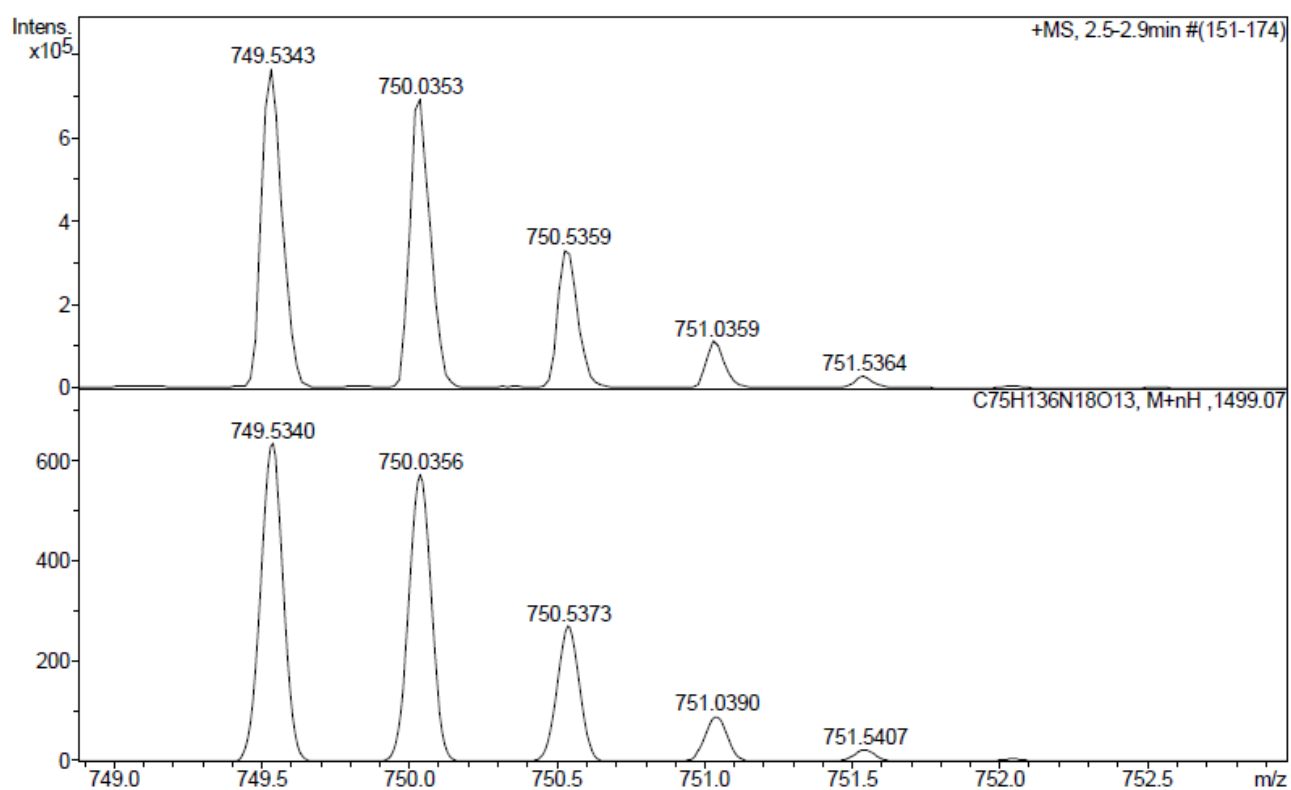

**Ac-Lys-Lys-Leu-D-Phe-Lys-Lys-Ile-Leu-Lys-Tyr-Lys(COC<sub>11</sub>H<sub>23</sub>)-NH<sub>2</sub> (BP476)**

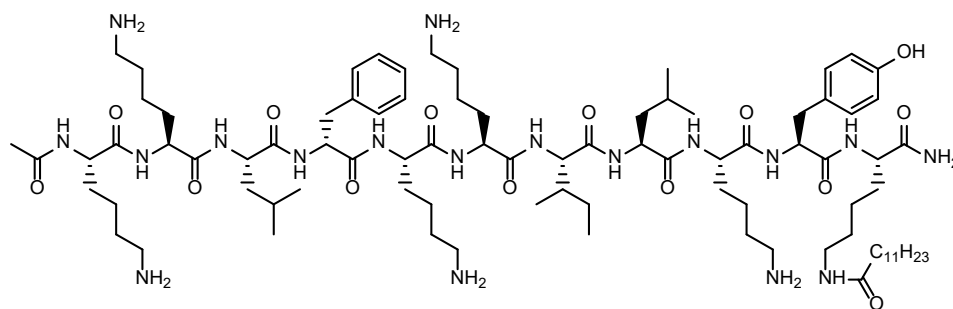

HPLC of crude peptide ( $\lambda=220$  nm)

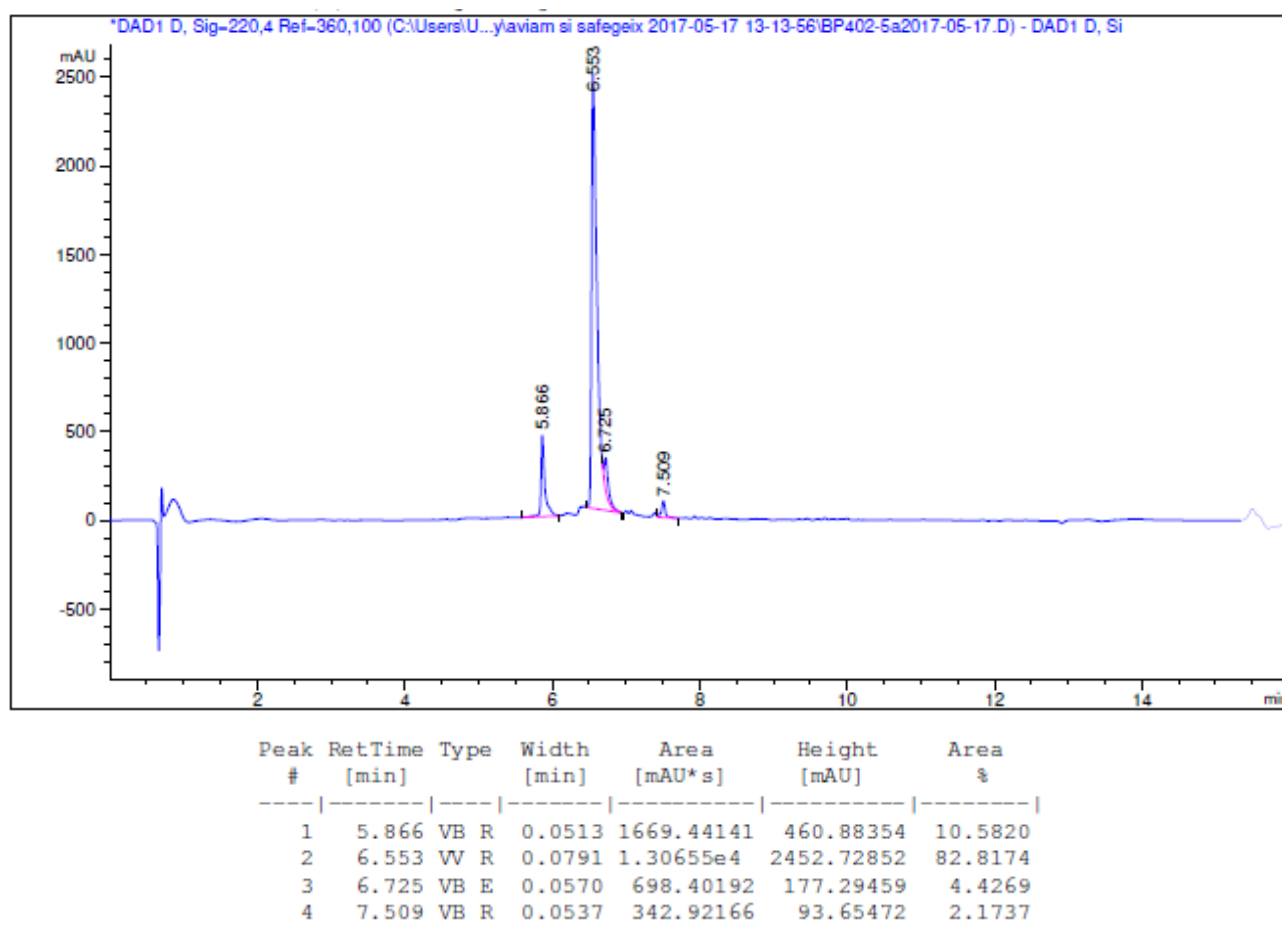

# HPLC of purified peptide ( $\lambda=220$ nm)

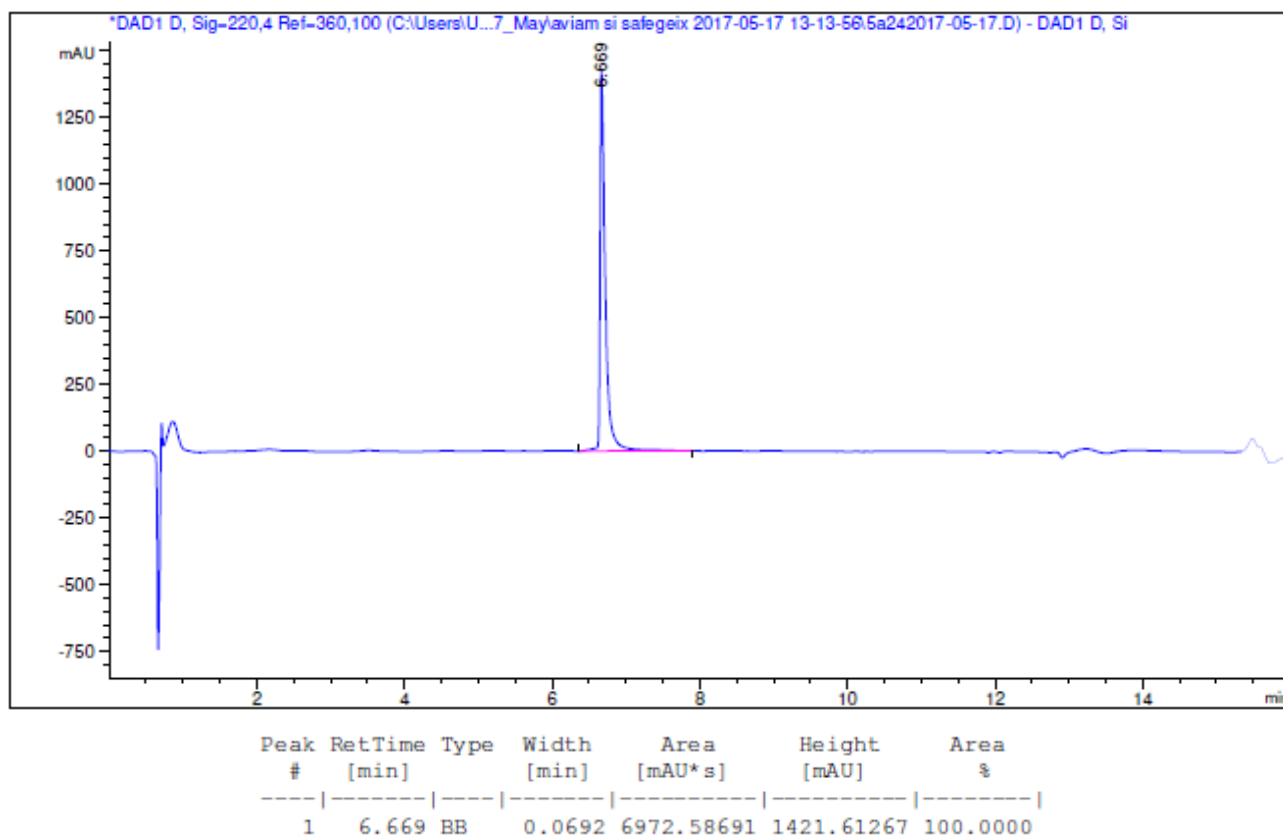

## ESI-MS ( $m/z$ )

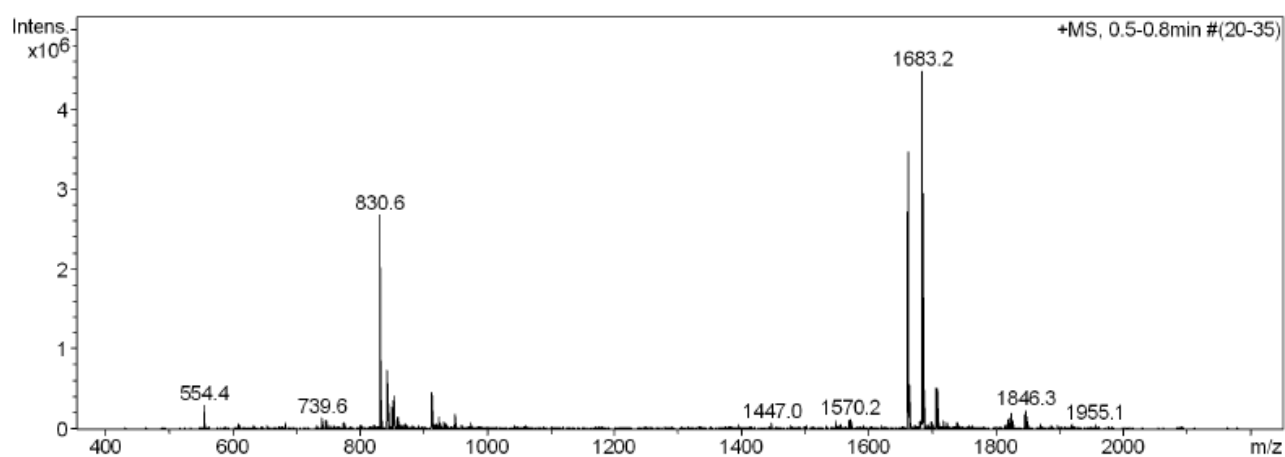

# HRMS ( $m/z$ )

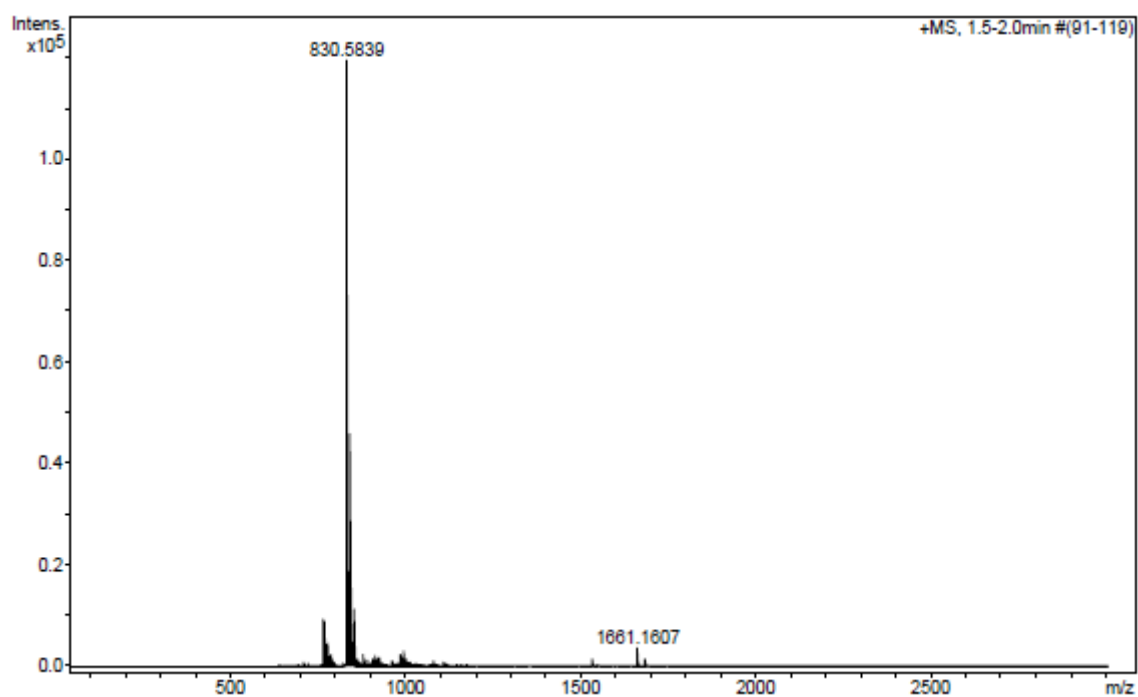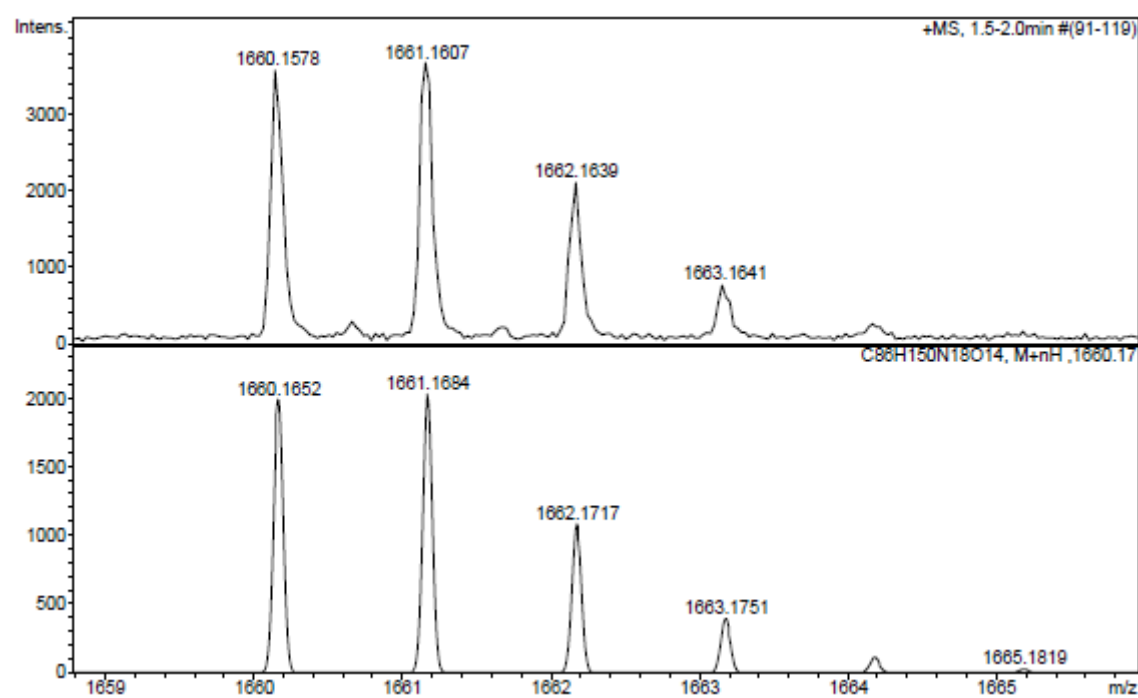

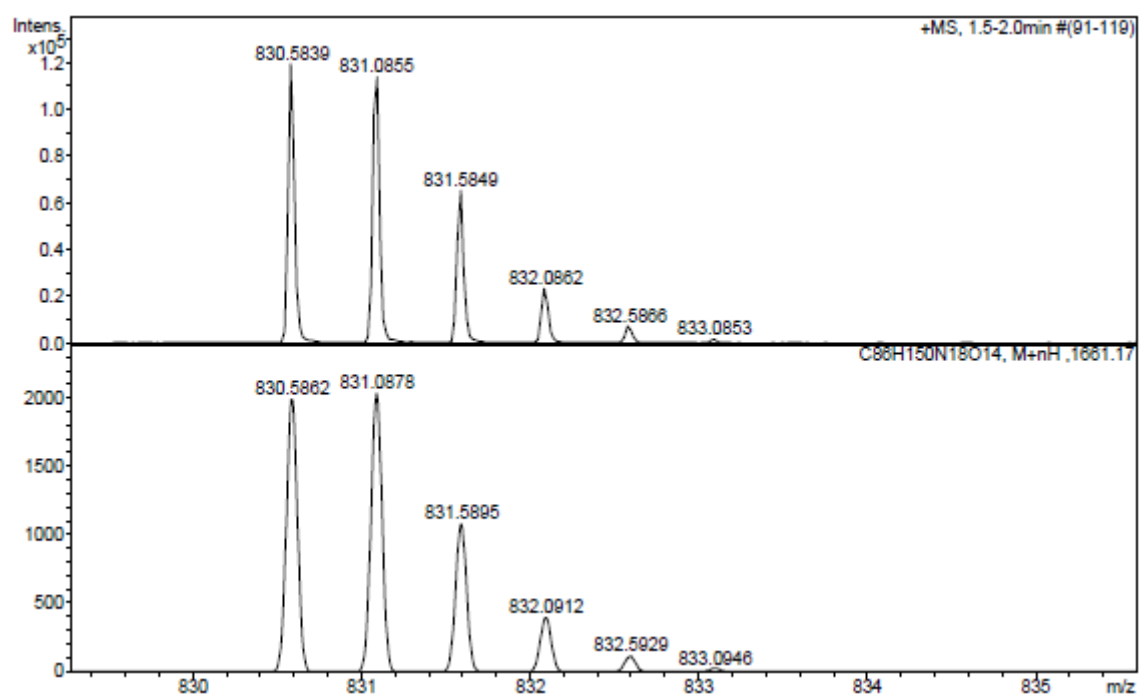

**Ac-Lys-Lys-Leu-D-Lys(COC<sub>5</sub>H<sub>11</sub>)-Lys-Lys-Ile-Leu-Lys-Tyr-Leu-NH<sub>2</sub> (BP484)**

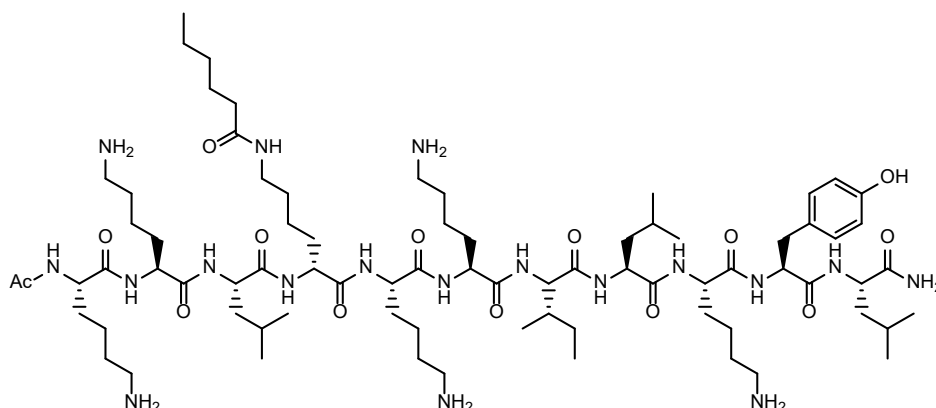

HPLC of crude peptide ( $\lambda=220$  nm)

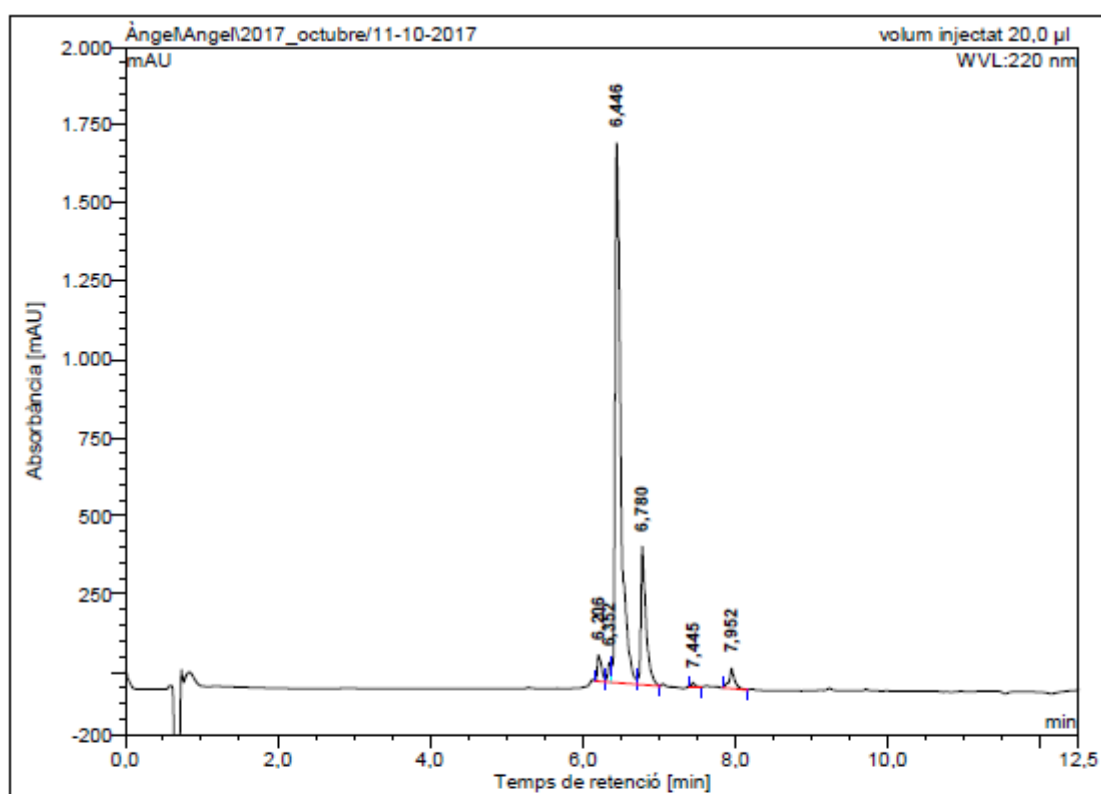

| No.    | Ret.Time (detected)<br>min | Height<br>mAU | Area<br>mAU*min | Rel.Area<br>% |
|--------|----------------------------|---------------|-----------------|---------------|
| 1      | 6,21                       | 83,361        | 5,410           | 2,75          |
| 2      | 6,35                       | 62,693        | 3,161           | 1,61          |
| 3      | 6,45                       | 1725,101      | 147,916         | 75,14         |
| 4      | 6,78                       | 441,976       | 34,458          | 17,50         |
| 5      | 7,45                       | 13,446        | 0,734           | 0,37          |
| 6      | 7,95                       | 63,681        | 5,177           | 2,63          |
| Total: |                            | 2390,257      | 196,857         | 100,00        |

# HPLC of purified peptide ( $\lambda=220$ nm)

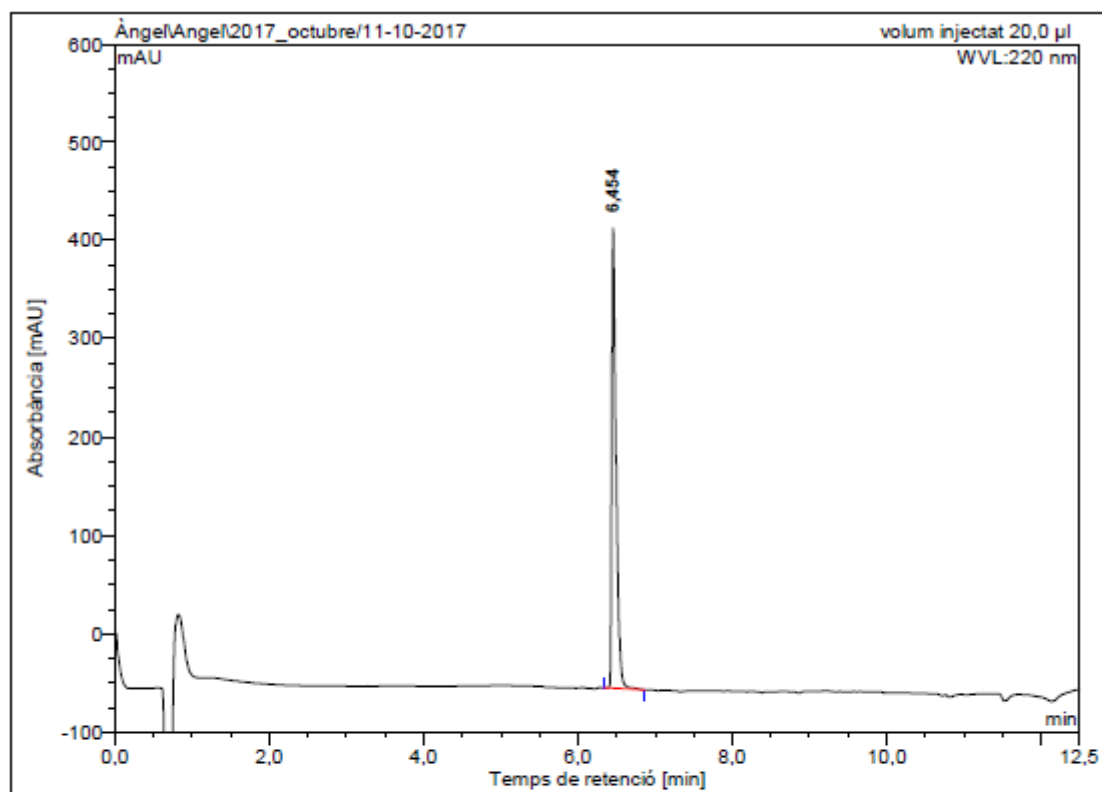

| No.    | Ret.Time (detected)<br>min | Height<br>mAU | Area<br>mAU*min | Rel.Area<br>% |
|--------|----------------------------|---------------|-----------------|---------------|
| 1      | 6,45                       | 467,768       | 30,006          | 100,00        |
| Total: |                            | 467,768       | 30,006          | 100,00        |

## ESI-MS ( $m/z$ )

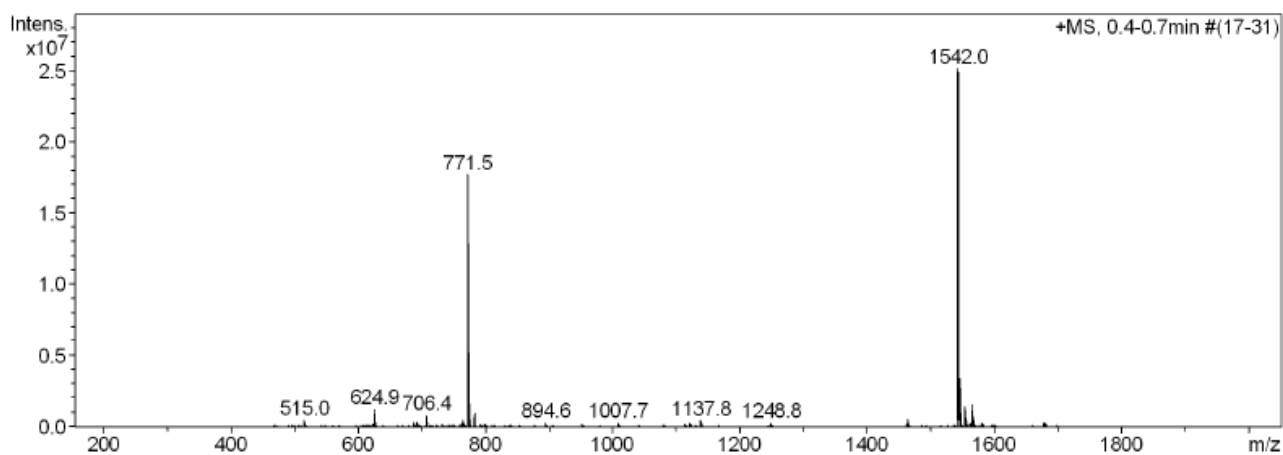



# HRMS ( $m/z$ )

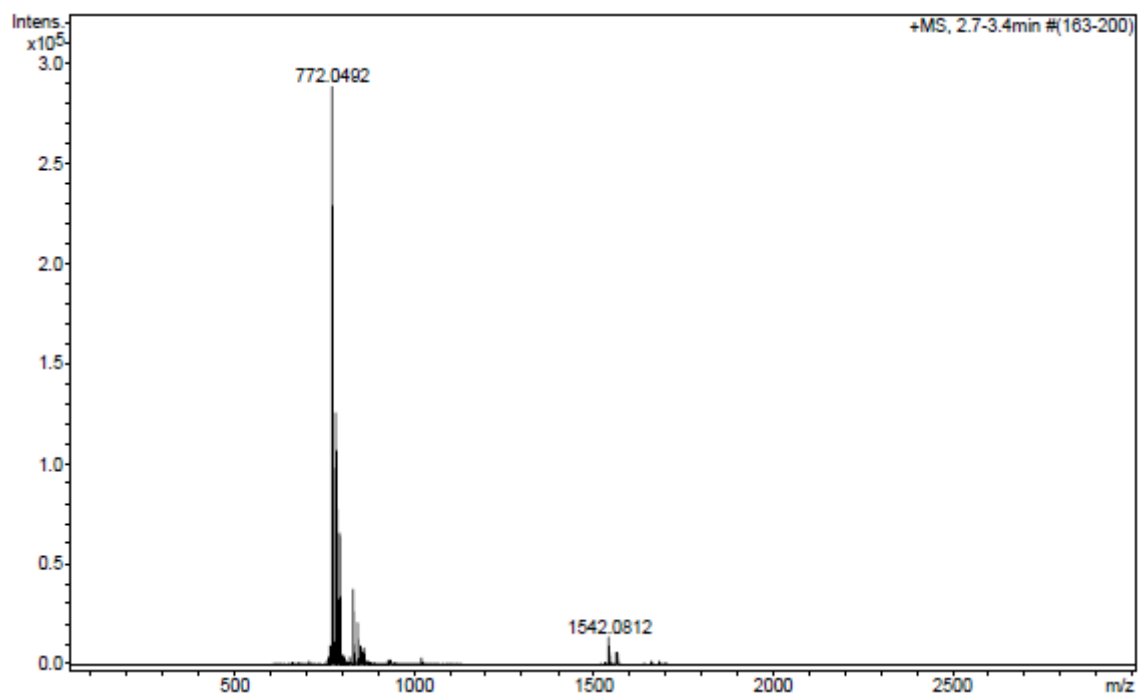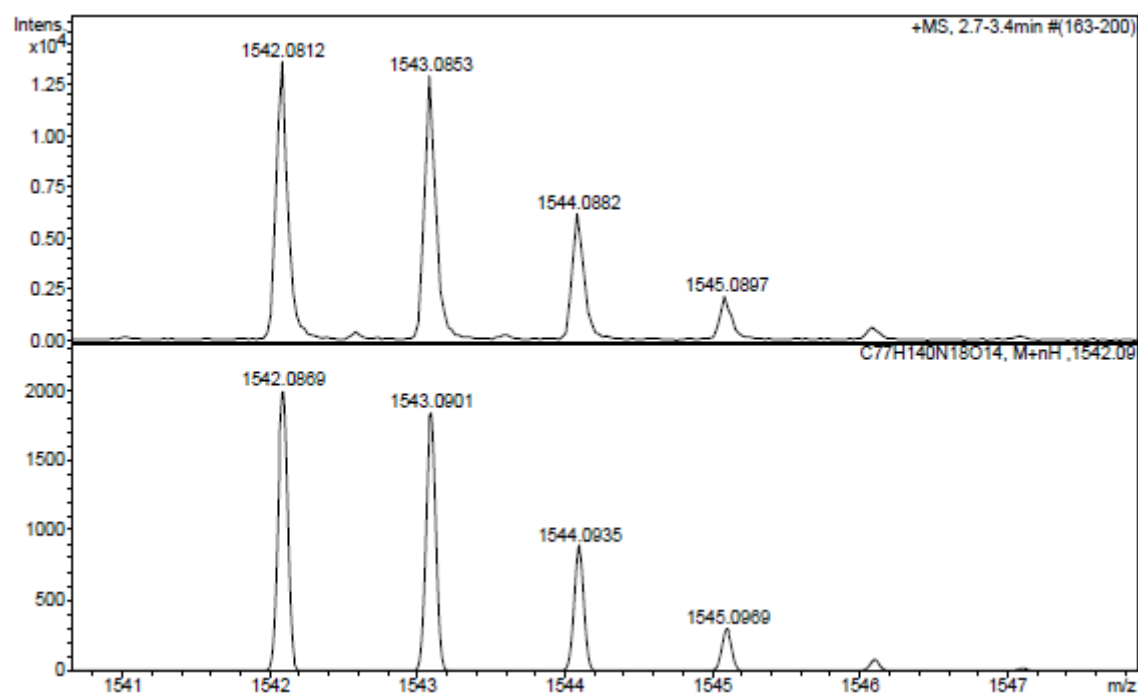

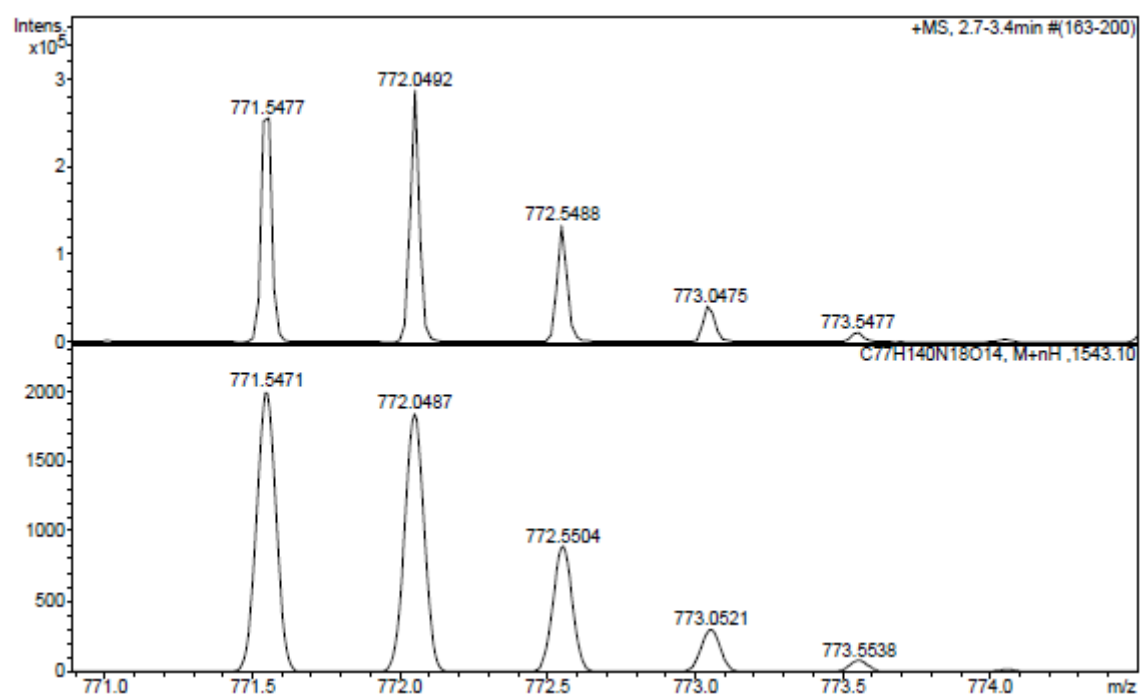

**C<sub>3</sub>H<sub>7</sub>CO-Lys-Lys-Leu-D-Phe-Lys-Lys-Ile-Leu-Lys-Tyr-Leu-NH<sub>2</sub> (BP485)**

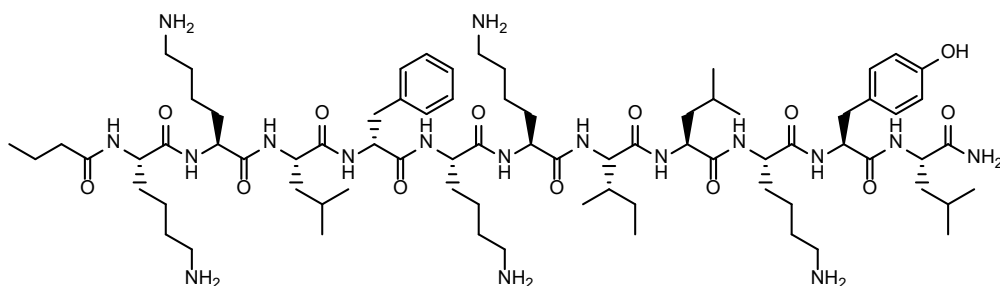

HPLC of crude peptide ( $\lambda=220$  nm)

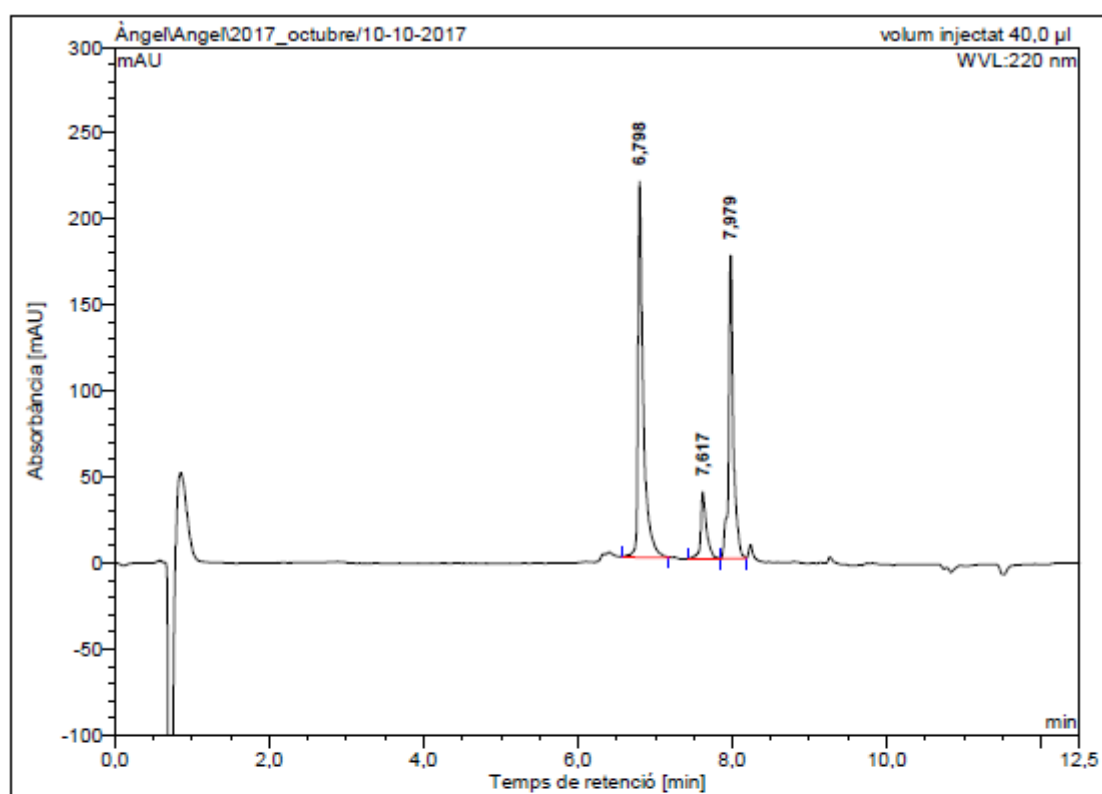

| No.    | Ret.Time (detected)<br>min | Height<br>mAU | Area<br>mAU*min | Rel.Area<br>% |
|--------|----------------------------|---------------|-----------------|---------------|
| 1      | 6,80                       | 218,320       | 17,258          | 52,25         |
| 2      | 7,62                       | 38,563        | 3,368           | 10,20         |
| 3      | 7,98                       | 176,249       | 12,401          | 37,55         |
| Total: |                            | 433,132       | 33,026          | 100,00        |

# HPLC of purified peptide ( $\lambda=220$ nm)

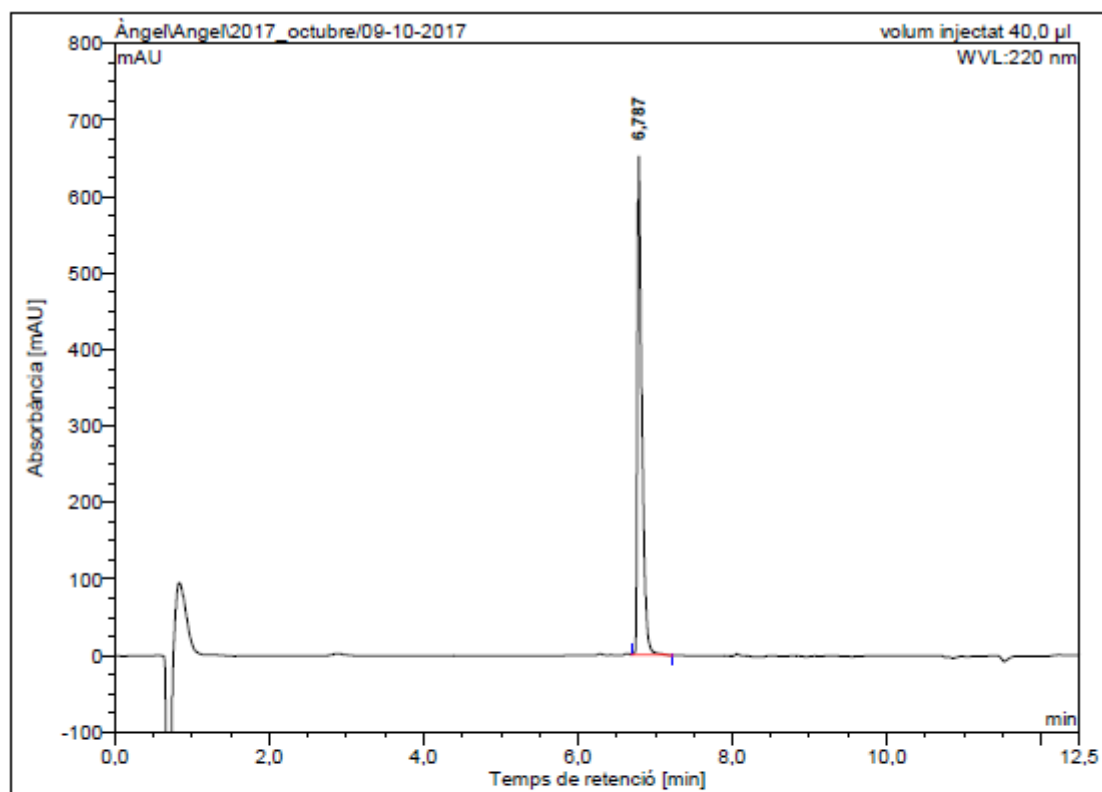

| No.    | Ret.Time (detected)<br>min | Height<br>mAU | Area<br>mAU*min | Rel.Area<br>% |
|--------|----------------------------|---------------|-----------------|---------------|
| 1      | 6,79                       | 651,352       | 44,377          | 100,00        |
| Total: |                            | 651,352       | 44,377          | 100,00        |

## ESI-MS ( $m/z$ )

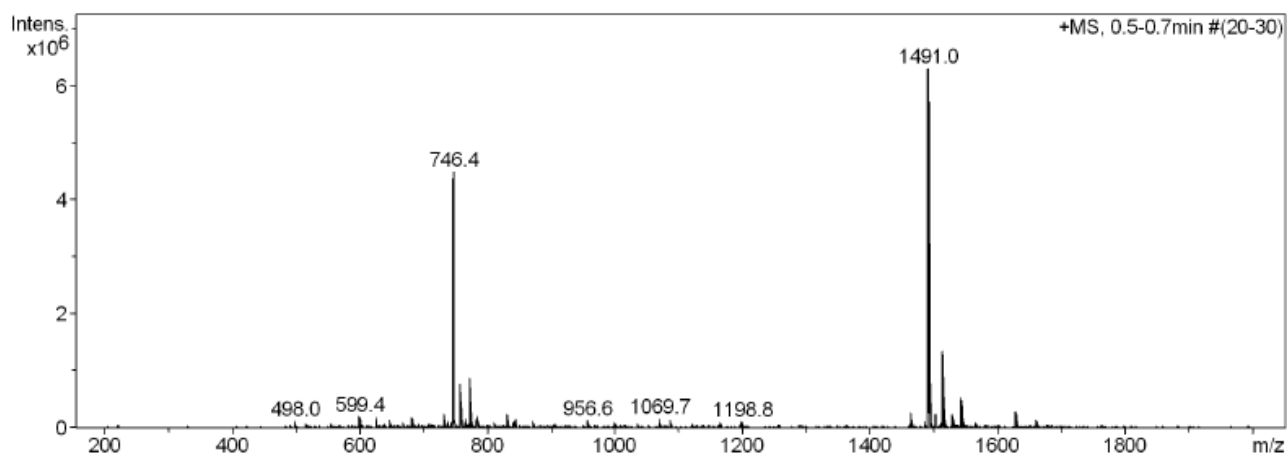

# HRMS ( $m/z$ )

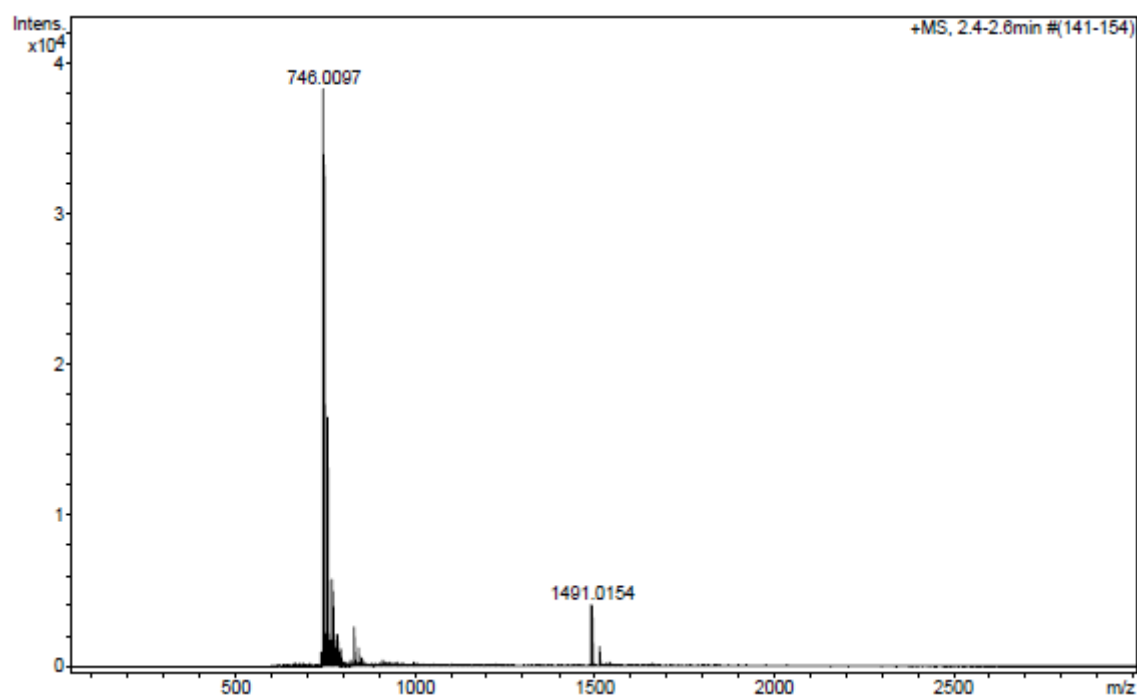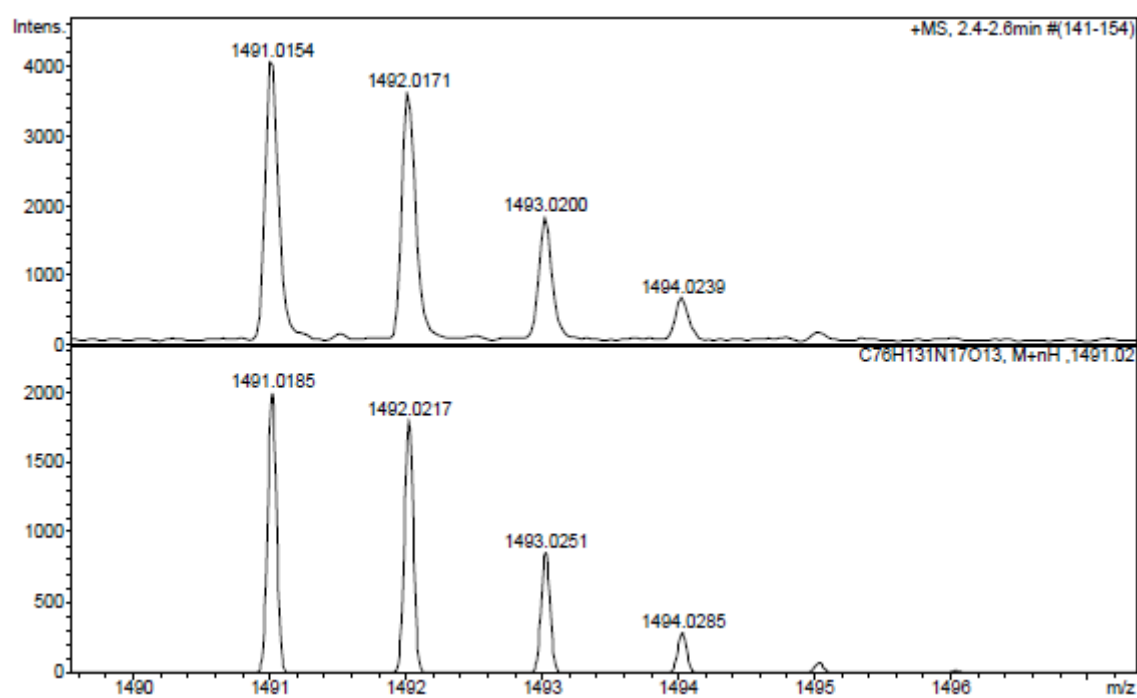

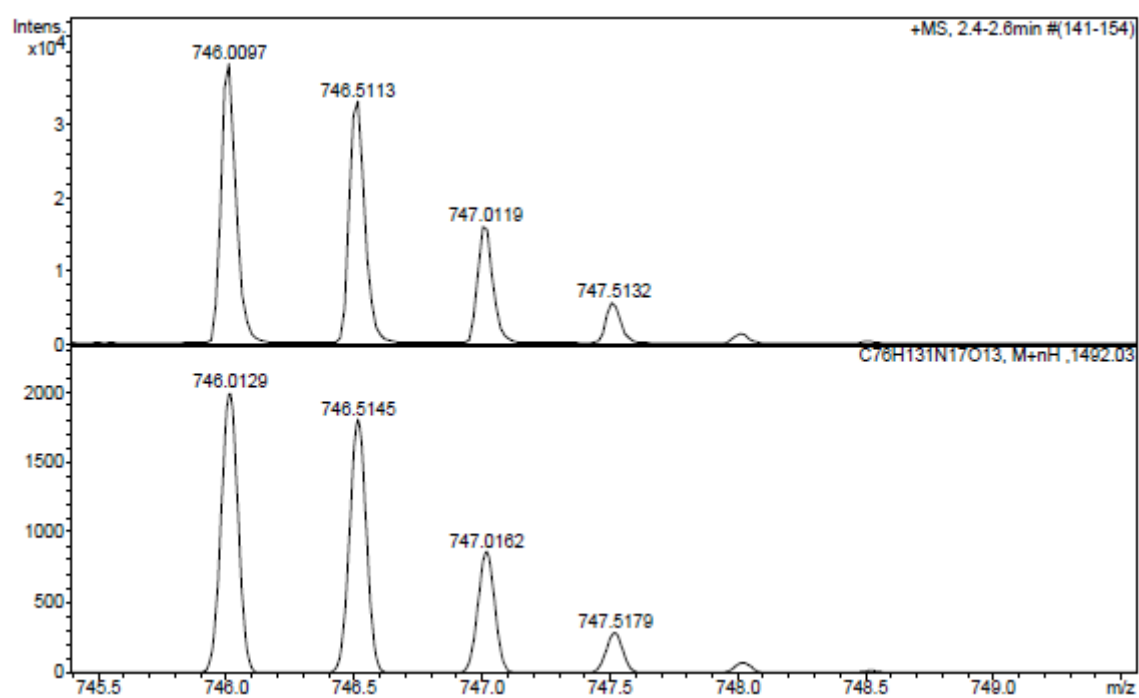

**Ac-Lys-Lys(COC<sub>3</sub>H<sub>7</sub>)-Leu-D-Phe-Lys-Lys-Ile-Leu-Lys-Tyr-Leu-NH<sub>2</sub> (BP486)**

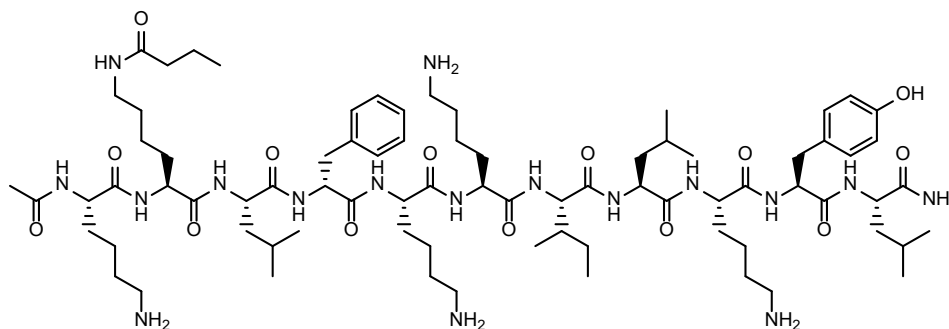

HPLC of crude peptide ( $\lambda=220$  nm)

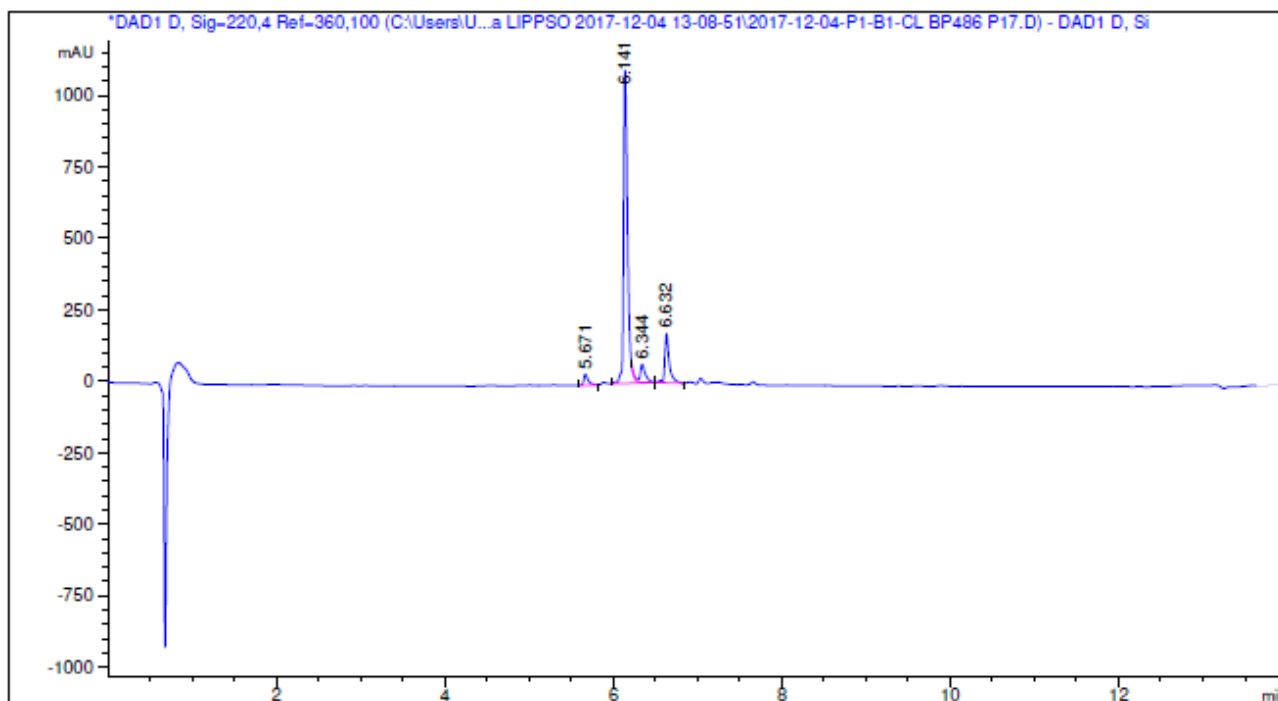

| Peak # | RetTime [min] | Type | Width [min] | Area [mAU*s] | Height [mAU] | Area %  |
|--------|---------------|------|-------------|--------------|--------------|---------|
| 1      | 5.671         | BB   | 0.0522      | 143.78764    | 39.70819     | 3.1093  |
| 2      | 6.141         | VV R | 0.0479      | 3568.24097   | 1098.94568   | 77.1617 |
| 3      | 6.344         | VB E | 0.0628      | 284.22037    | 63.95224     | 6.1461  |
| 4      | 6.632         | VB R | 0.0526      | 628.11932    | 172.08841    | 13.5828 |

Totals : 4624.36830 1374.69452

# HPLC of purified peptide ( $\lambda=220$ nm)

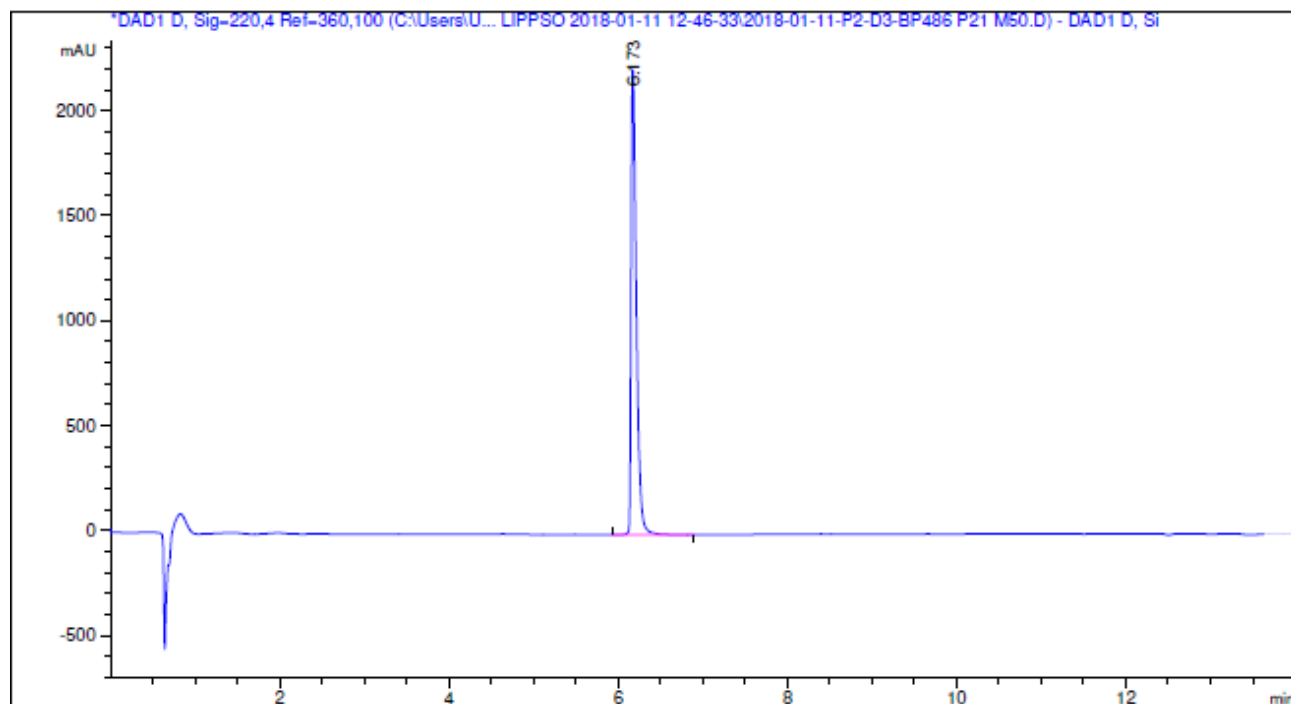

| Peak #   | RetTime [min] | Type | Width [min] | Area [mAU*s] | Height [mAU] | Area %   |
|----------|---------------|------|-------------|--------------|--------------|----------|
| 1        | 6.173         | BB   | 0.0634      | 9405.44824   | 2219.42041   | 100.0000 |
| Totals : |               |      |             | 9405.44824   | 2219.42041   |          |

## ESI-MS ( $m/z$ )

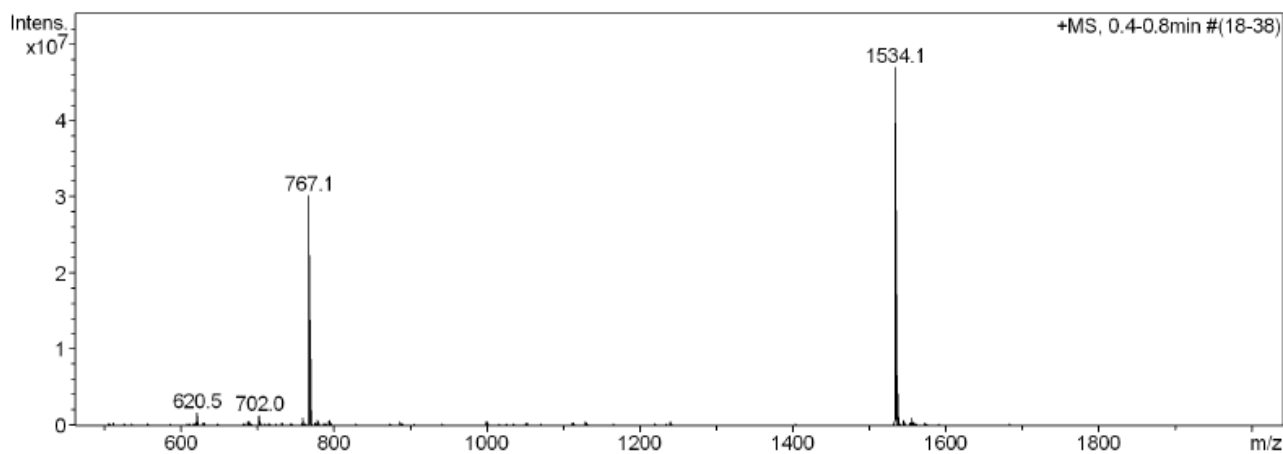



# HRMS ( $m/z$ )

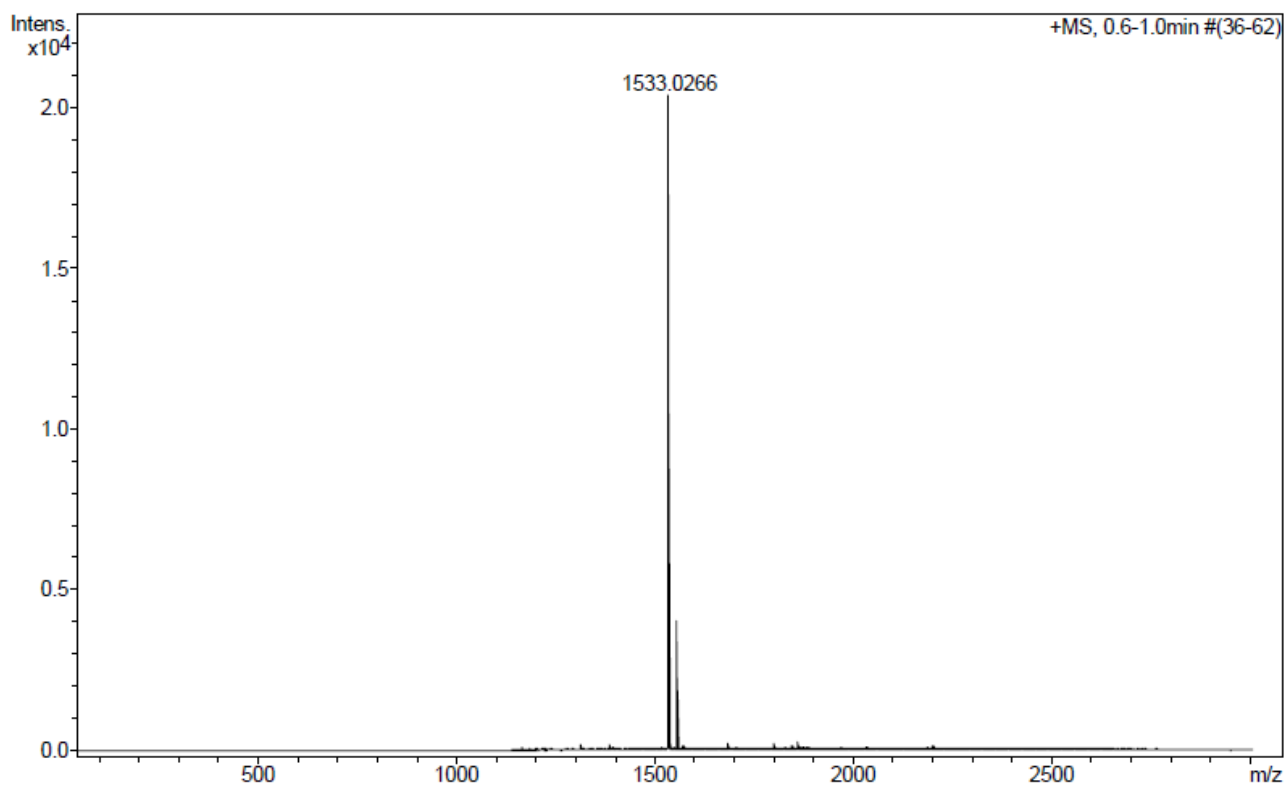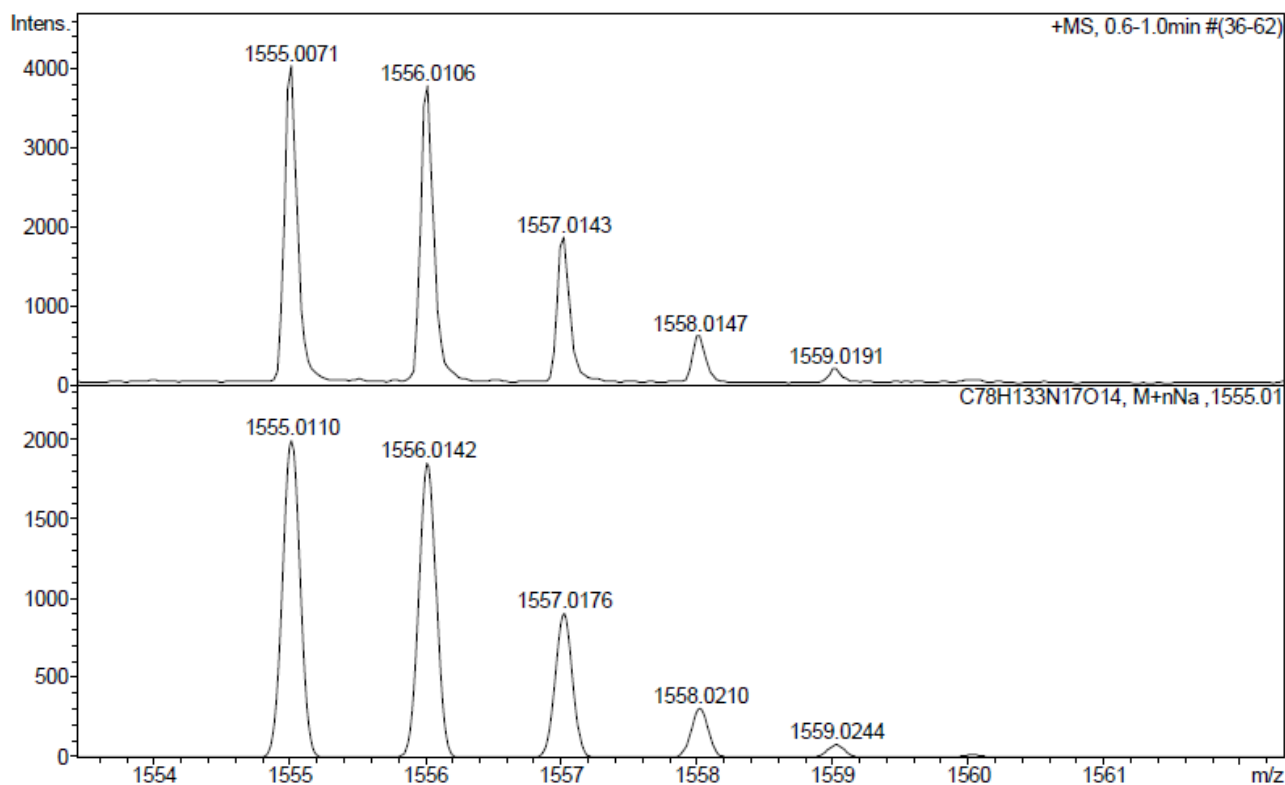

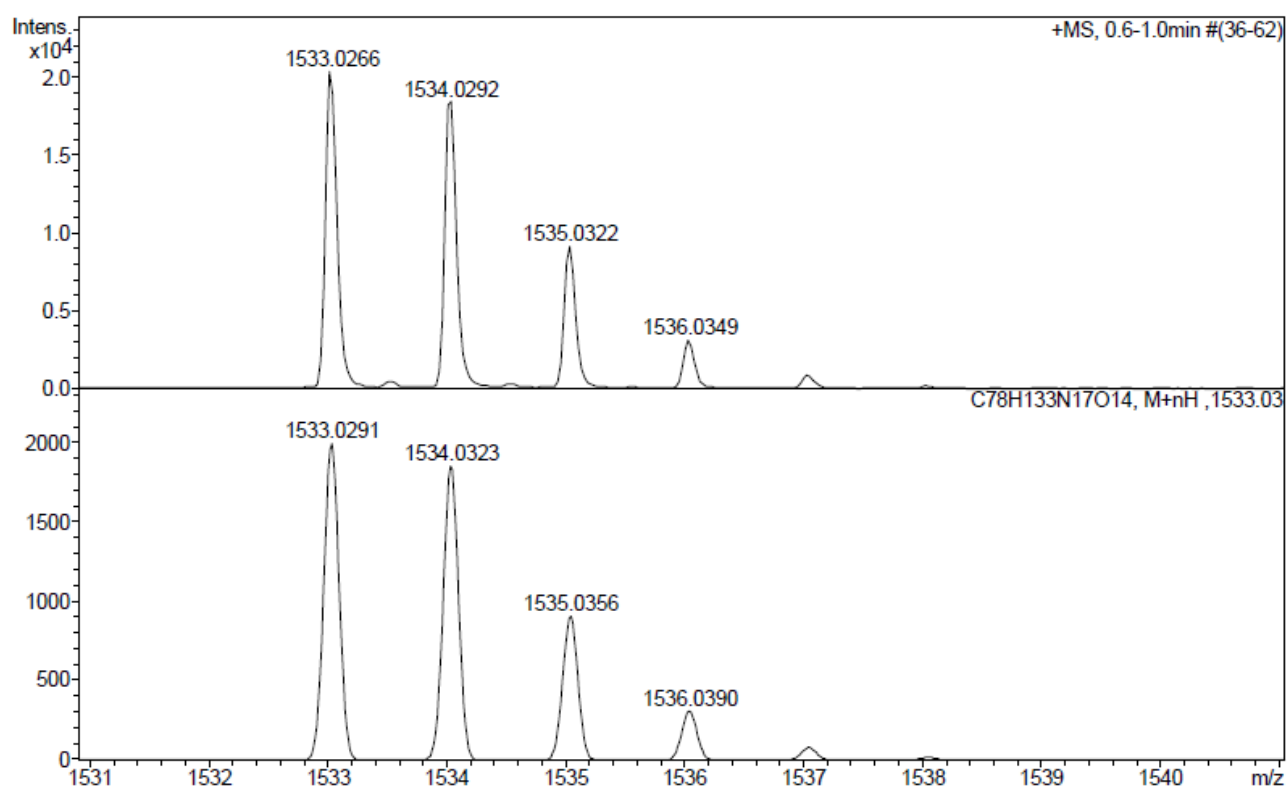

# **Ac-Lys-Lys-Leu-D-Lys(COC<sub>11</sub>H<sub>23</sub>)-Lys-Lys-Ile-Leu-Lys-Tyr-Leu-NH<sub>2</sub> (BP488)**

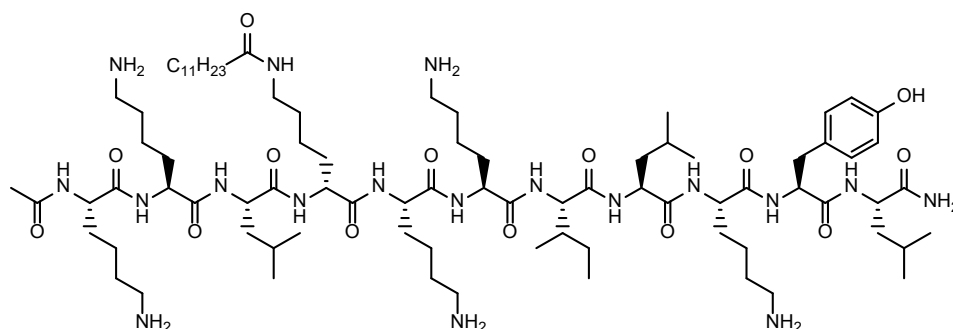

HPLC of crude peptide ( $\lambda=220$  nm)

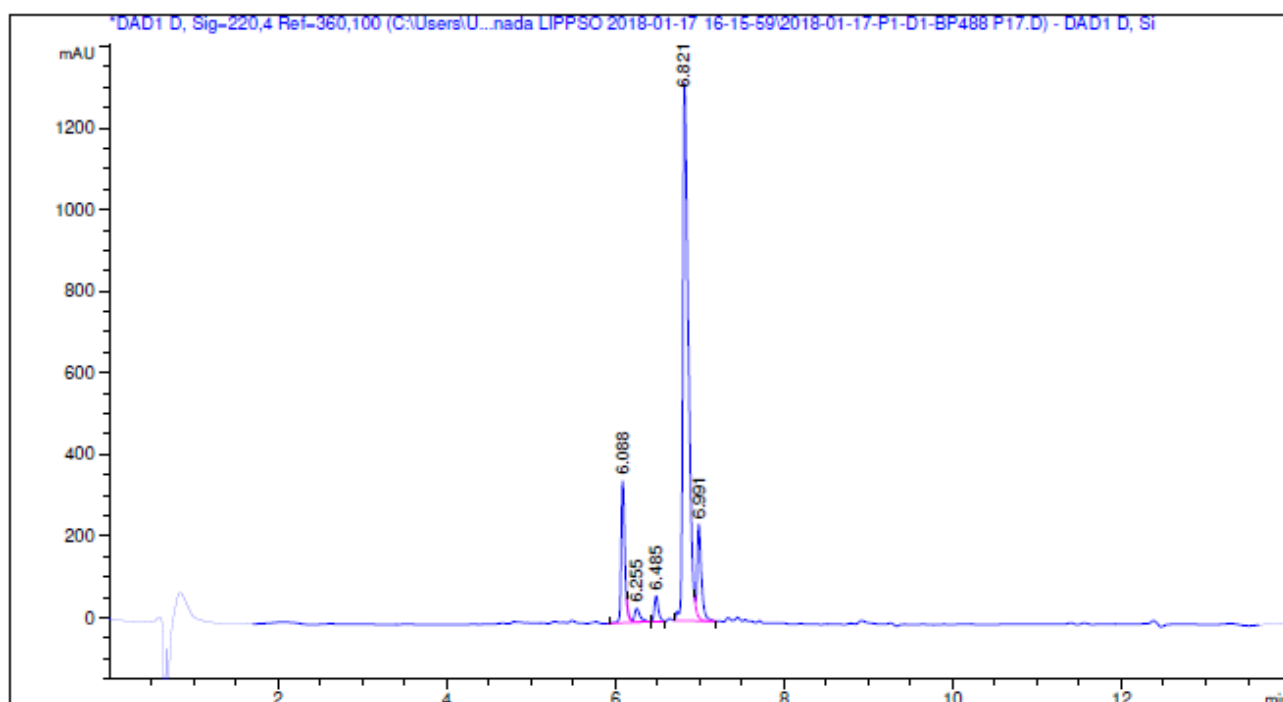

| Peak # | RetTime [min] | Type | Width [min] | Area [mAU*s] | Height [mAU] | Area %  |
|--------|---------------|------|-------------|--------------|--------------|---------|
| 1      | 6.088         | BV R | 0.0441      | 1046.76038   | 347.67551    | 12.7178 |
| 2      | 6.255         | VB E | 0.0670      | 154.87279    | 33.46687     | 1.8817  |
| 3      | 6.485         | BB   | 0.0487      | 202.15788    | 62.57148     | 2.4562  |
| 4      | 6.821         | VV R | 0.0686      | 6048.61426   | 1316.82983   | 73.4888 |
| 5      | 6.991         | VB E | 0.0507      | 778.25232    | 228.61604    | 9.4555  |

Totals : 8230.65762 1989.15973

# HPLC of purified peptide ( $\lambda=220$ nm)

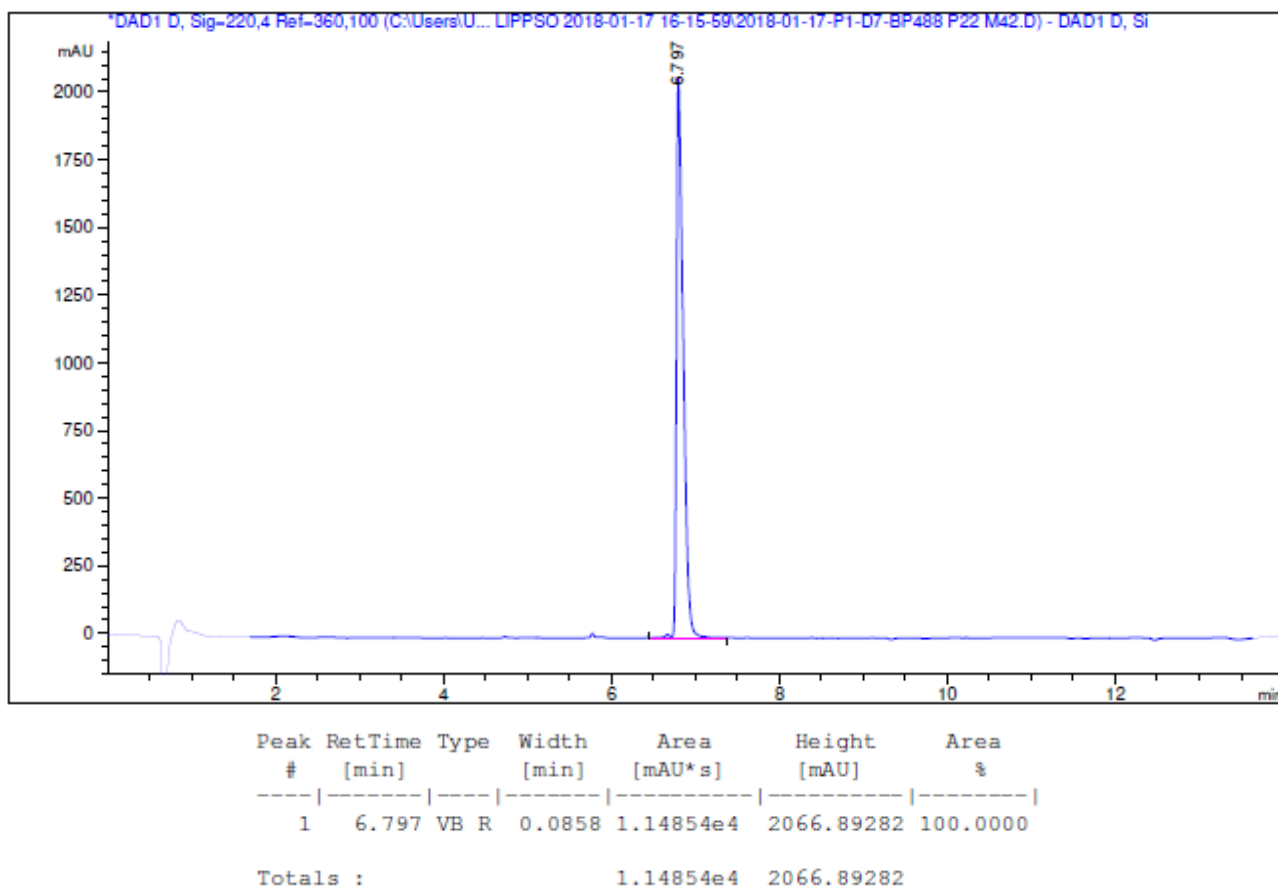

## ESI-MS ( $m/z$ )

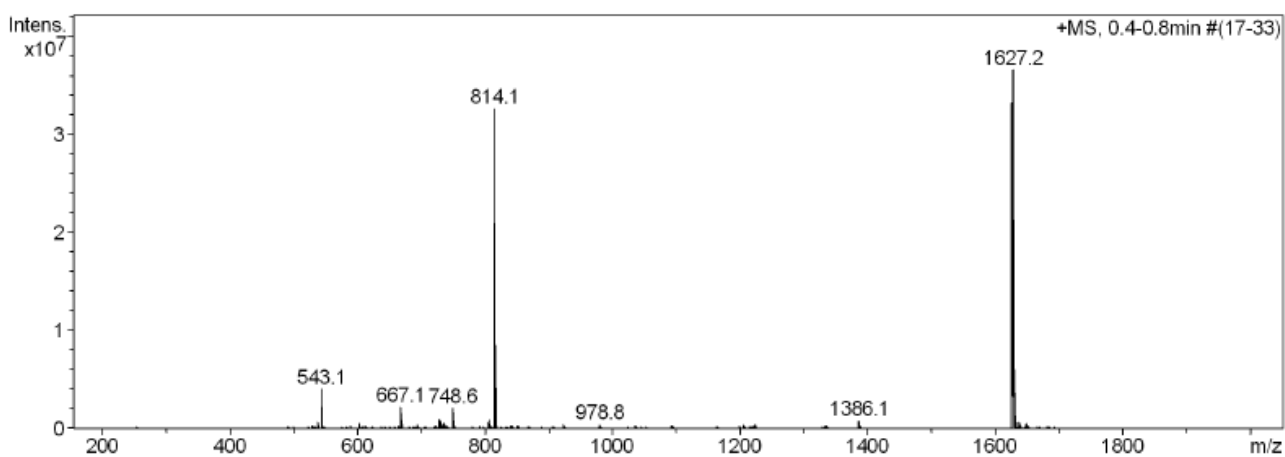

# HRMS (m/z)

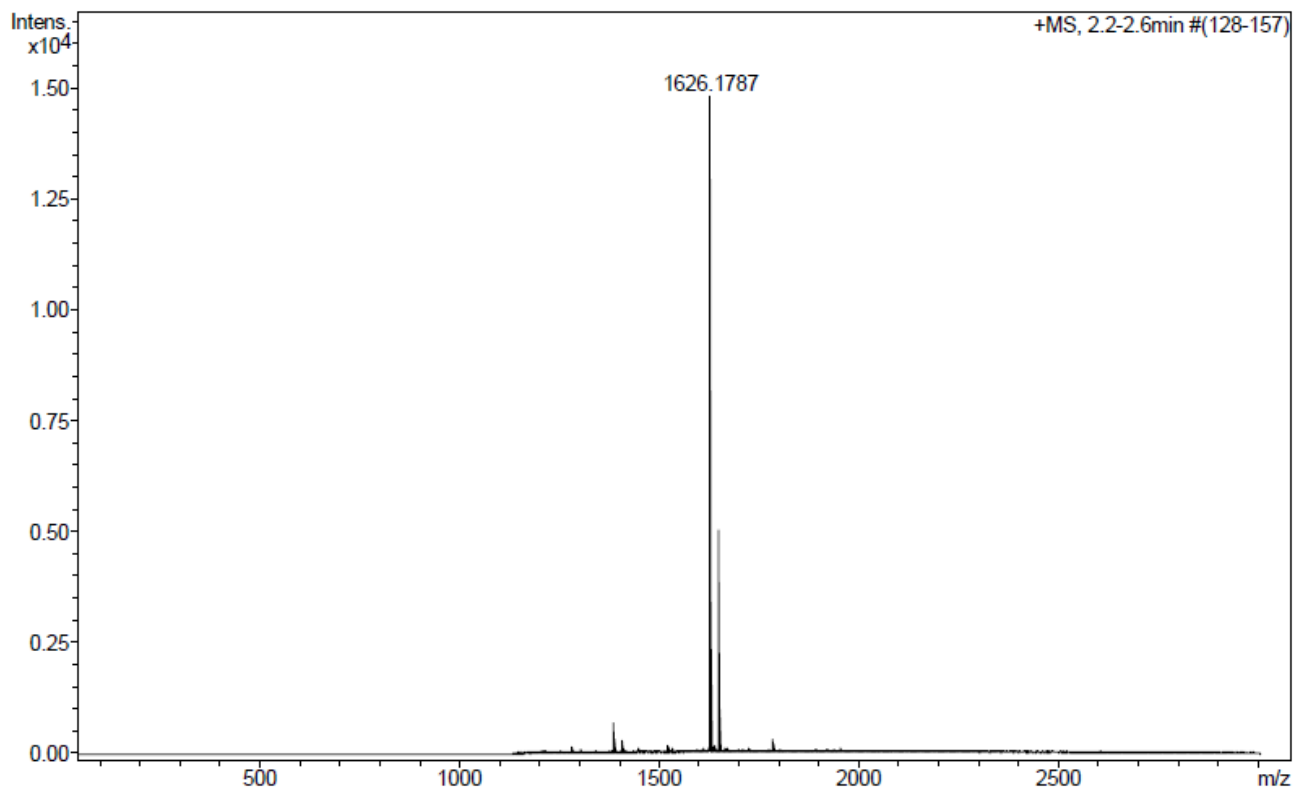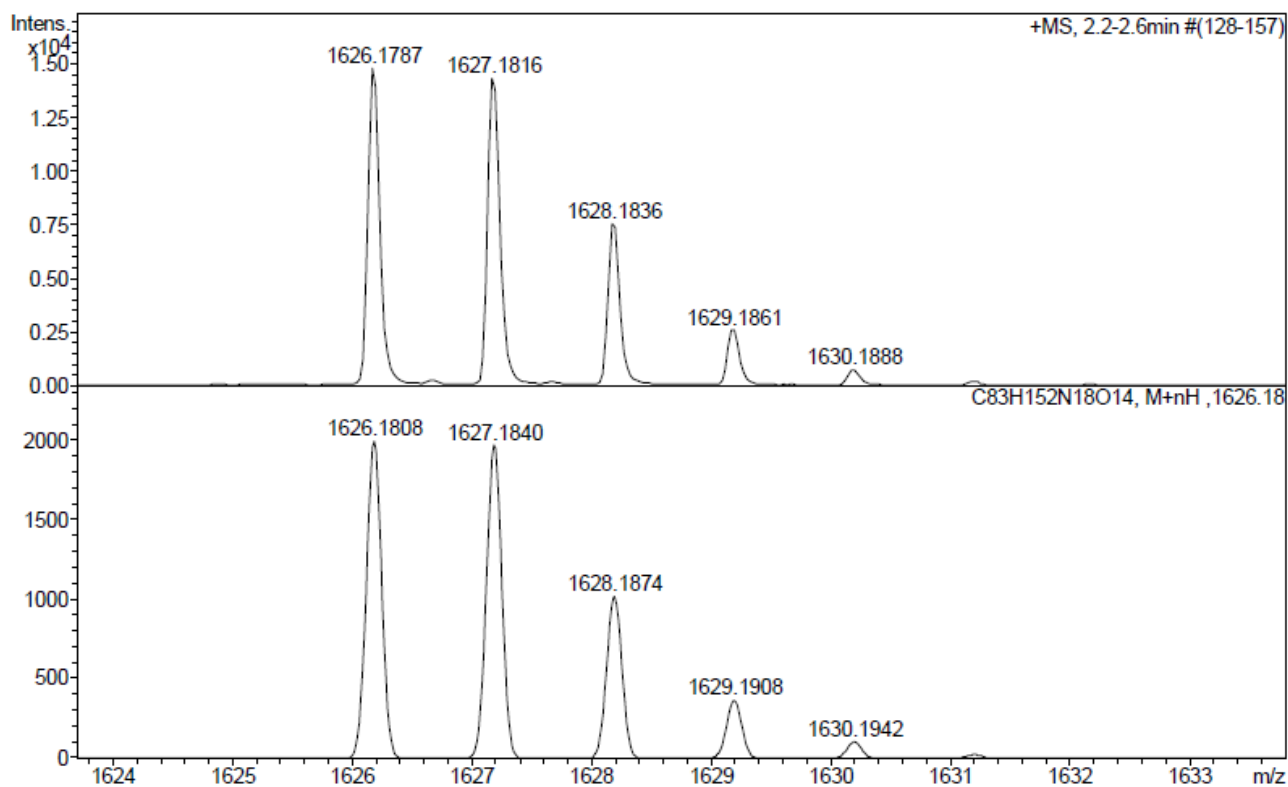

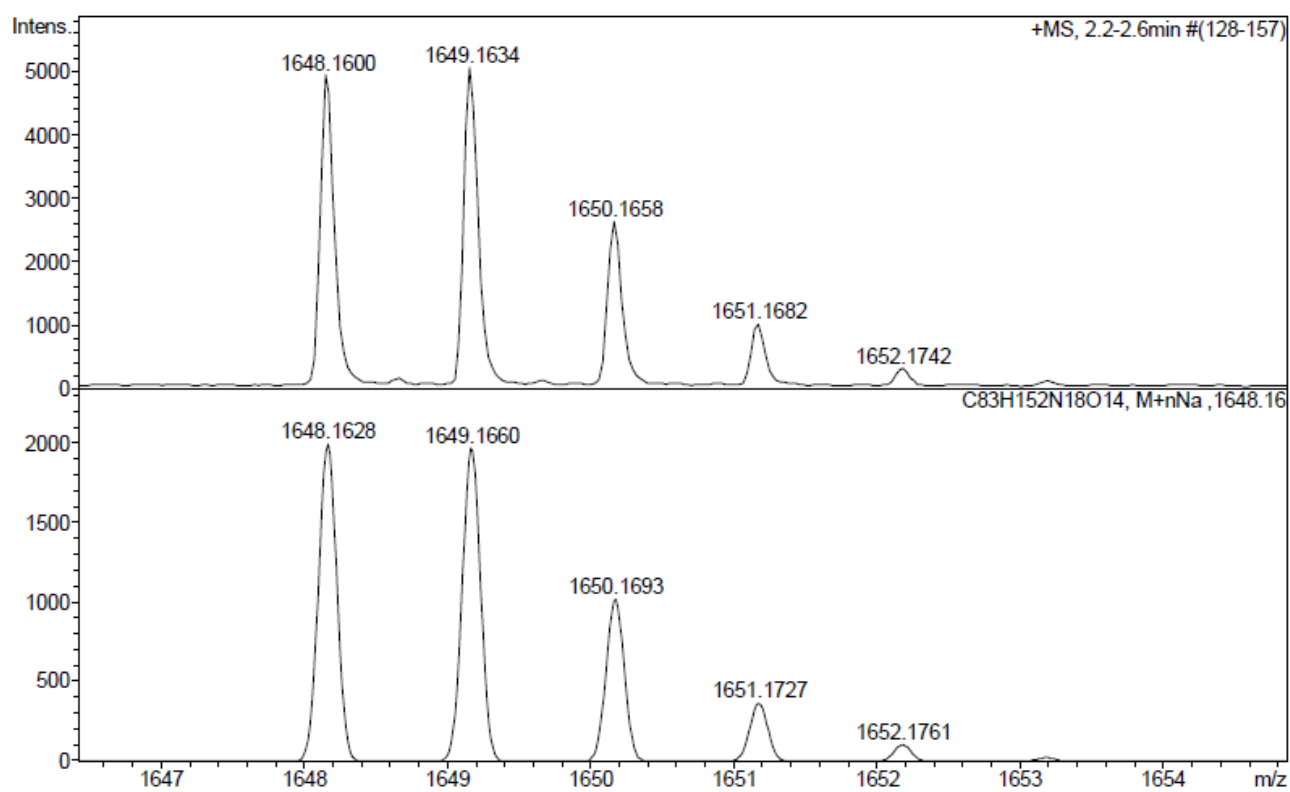

**Ac-Lys-Lys-Leu-D-Phe-Lys-Lys-Lys(COC<sub>11</sub>H<sub>23</sub>)-Leu-Lys-Tyr-Leu-NH<sub>2</sub> (BP489)**

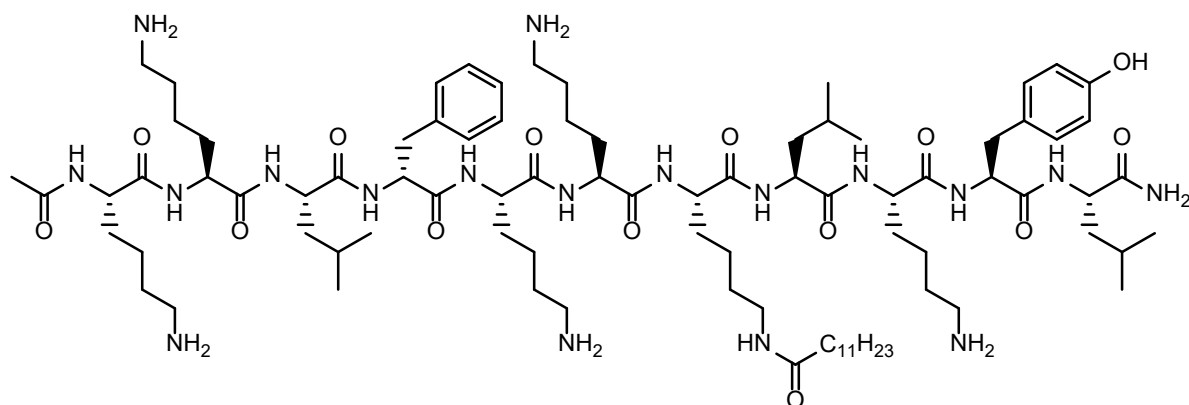

HPLC of crude peptide ( $\lambda=220$  nm)

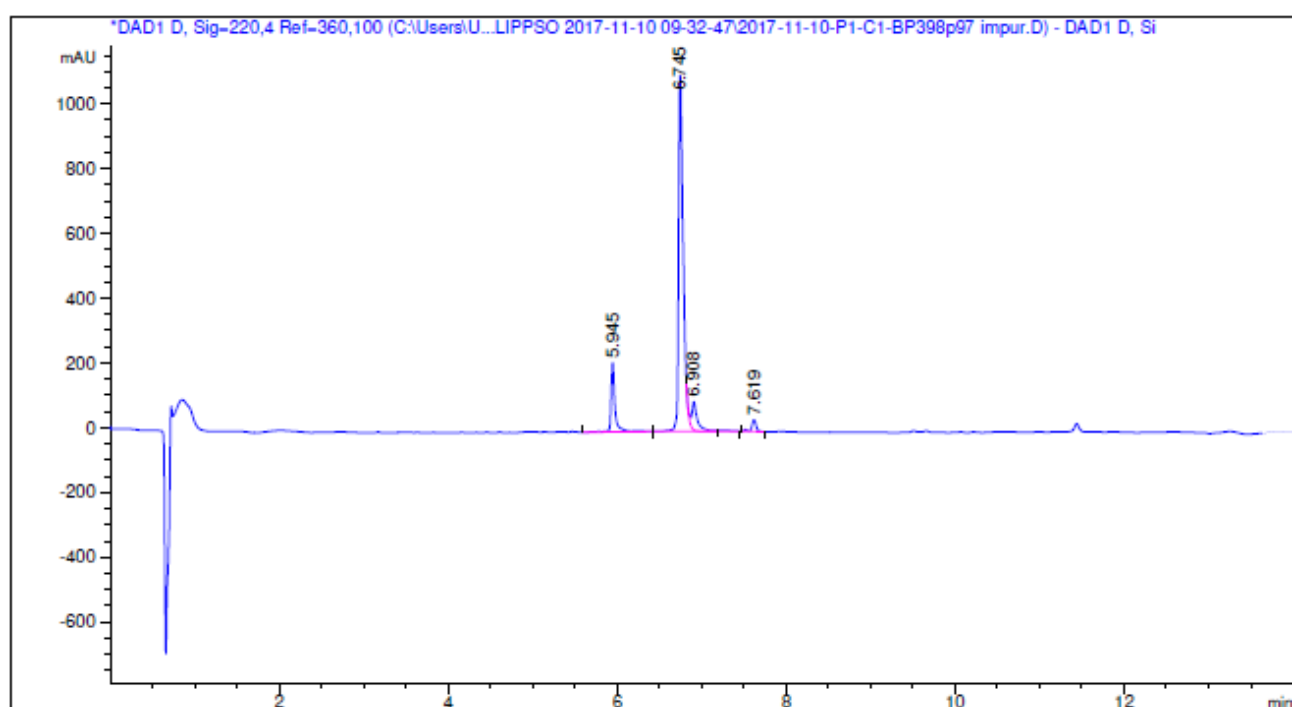

| Peak # | RetTime [min] | Type | Width [min] | Area [mAU*s] | Height [mAU] | Area %  |
|--------|---------------|------|-------------|--------------|--------------|---------|
| 1      | 5.945         | WV R | 0.0468      | 694.77289    | 214.59721    | 12.4485 |
| 2      | 6.745         | BV R | 0.0579      | 4328.80762   | 1099.50281   | 77.5611 |
| 3      | 6.908         | WV E | 0.0672      | 426.74368    | 87.06355     | 7.6461  |
| 4      | 7.619         | VB R | 0.0553      | 130.83649    | 36.04453     | 2.3443  |

Totals : 5581.16068 1437.20810

# HPLC of purified peptide ( $\lambda=220$ nm)

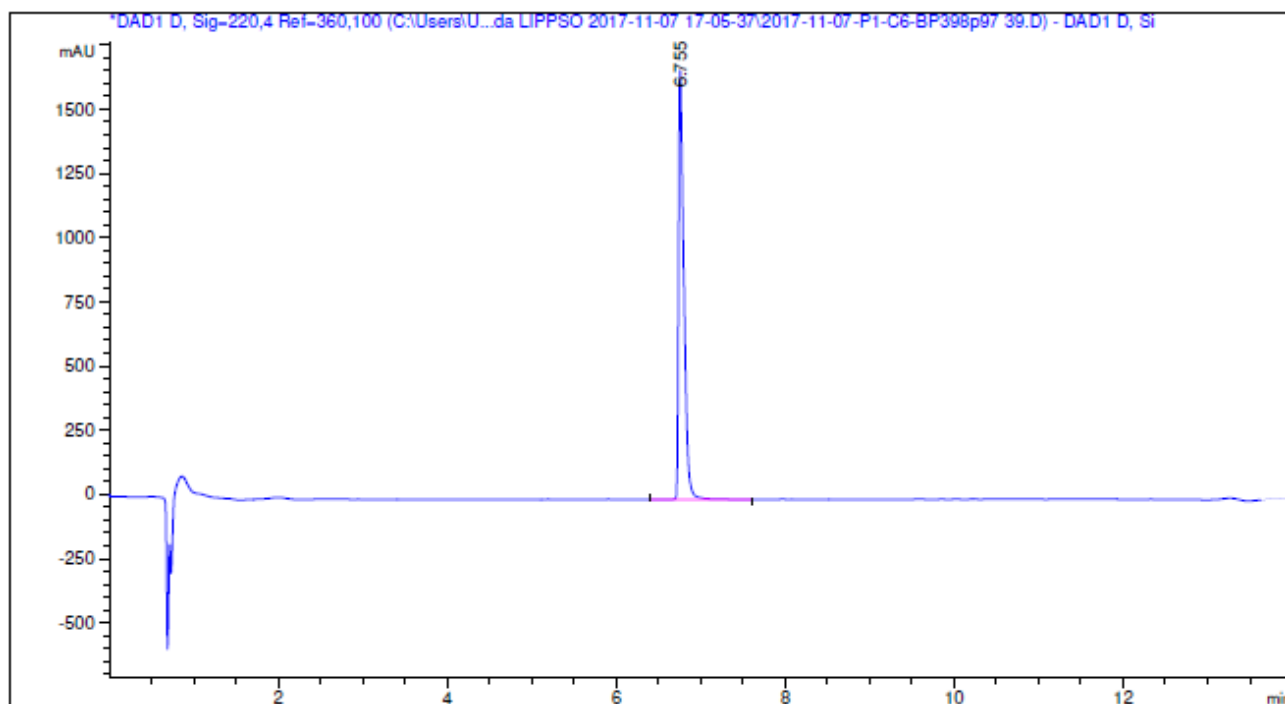

| Peak #   | RetTime [min] | Type | Width [min] | Area [mAU*s] | Height [mAU] | Area %   |
|----------|---------------|------|-------------|--------------|--------------|----------|
| 1        | 6.755         | BB   | 0.0665      | 7391.91846   | 1673.21887   | 100.0000 |
| Totals : |               |      |             | 7391.91846   | 1673.21887   |          |

## ESI-MS ( $m/z$ )

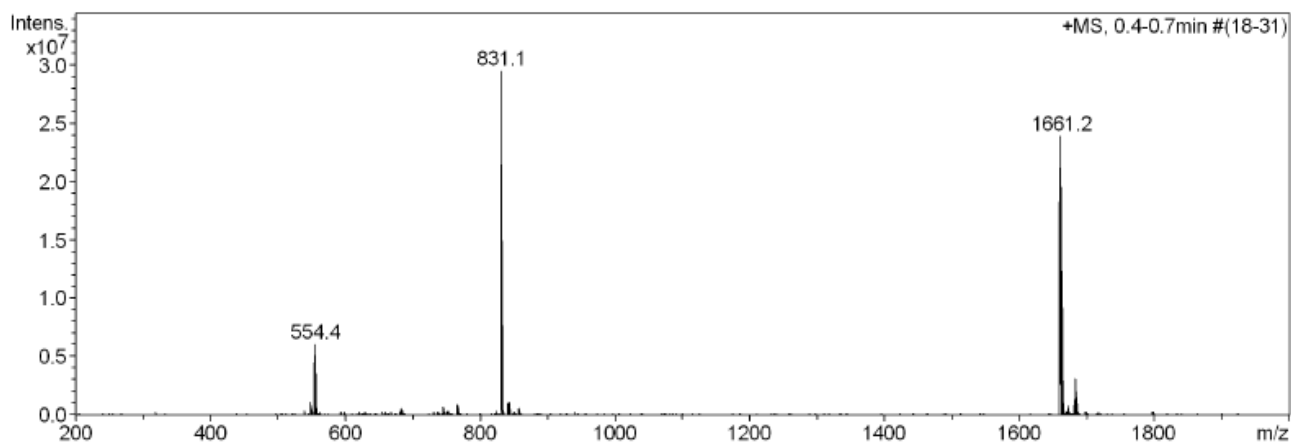



# HRMS ( $m/z$ )

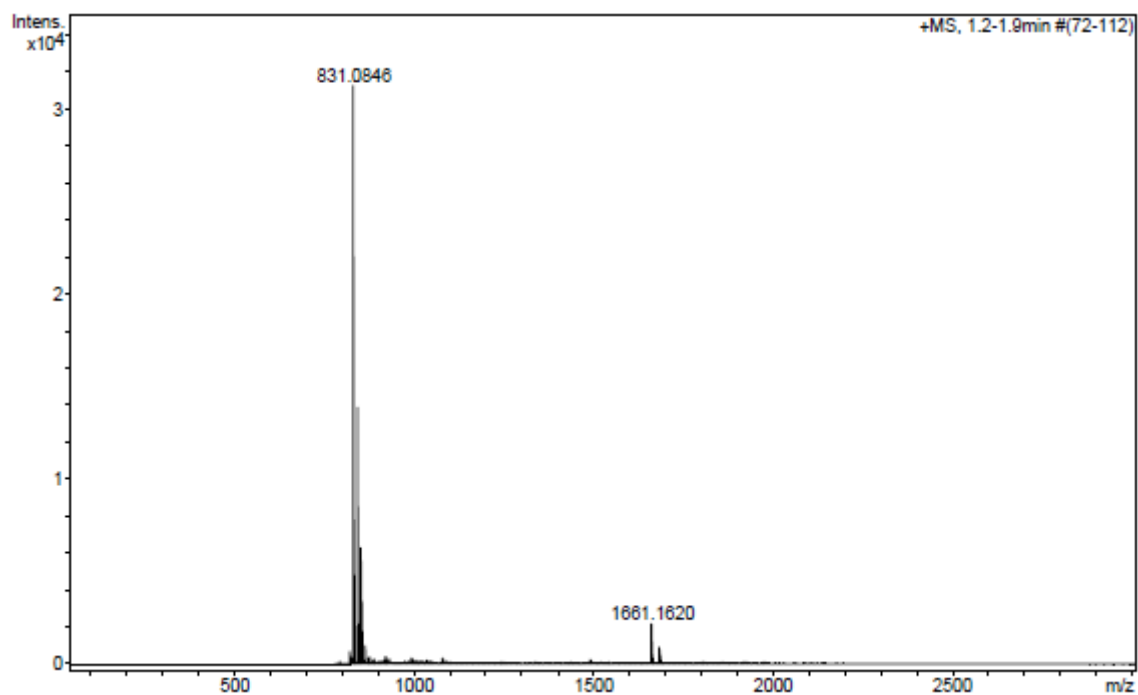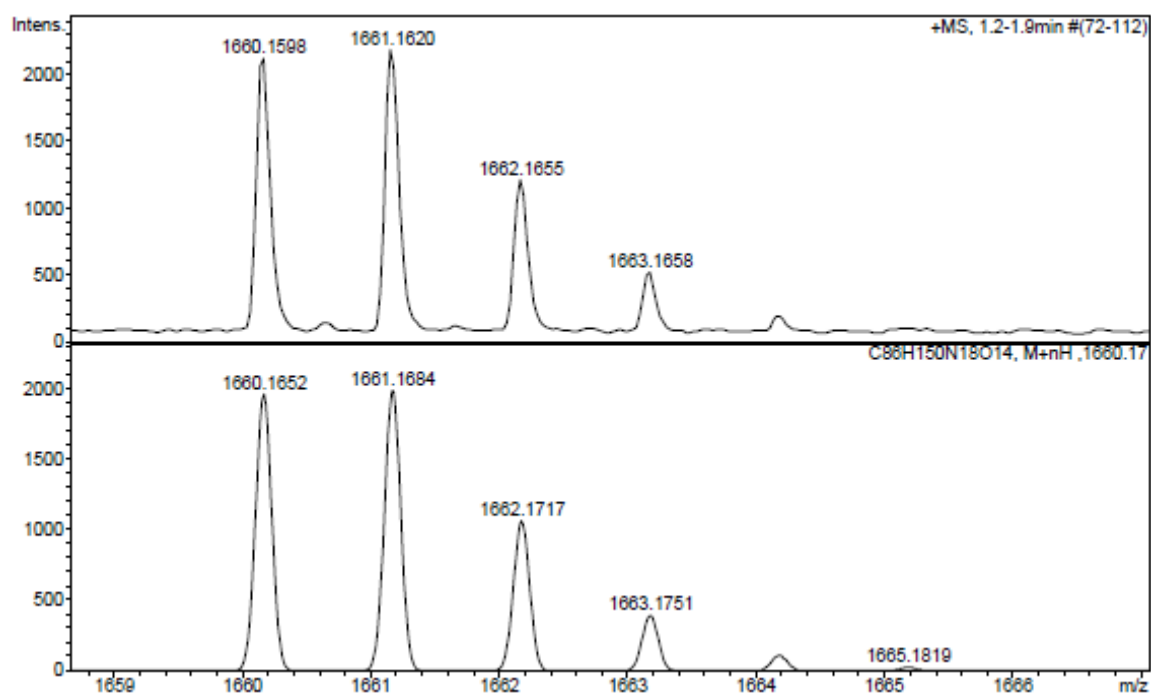

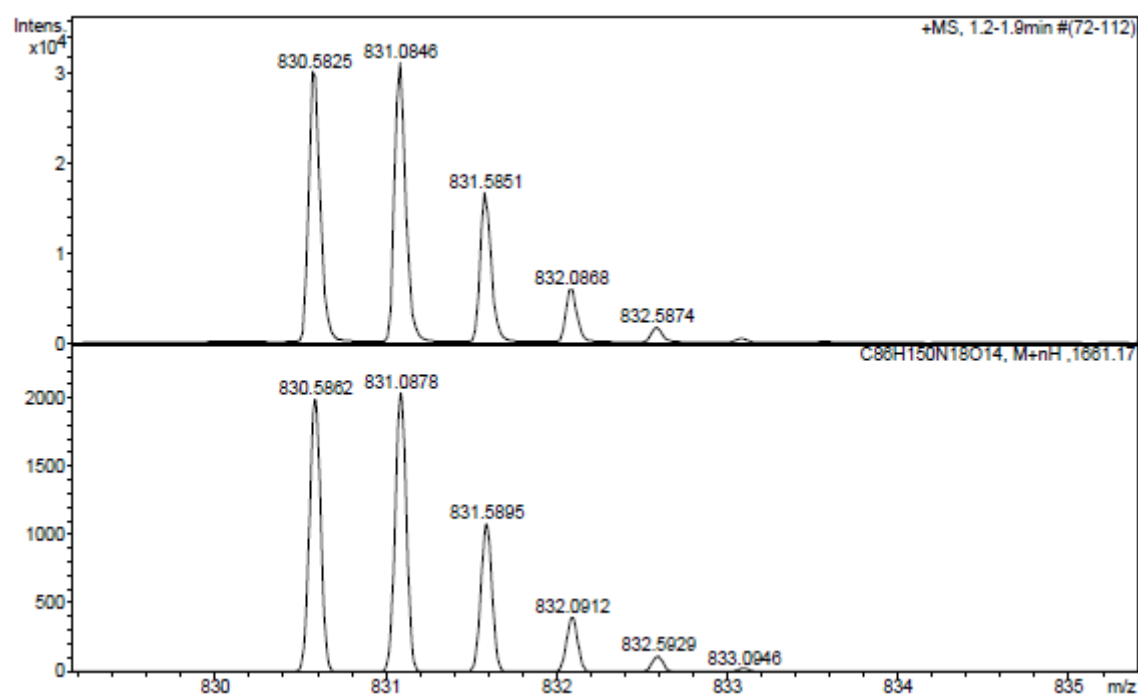

**Ac-Lys-Lys-Leu-D-Phe-Lys-Lys-Ile-Lys(COC<sub>11</sub>H<sub>23</sub>)-Lys-Tyr-Leu-NH<sub>2</sub> (BP490)**

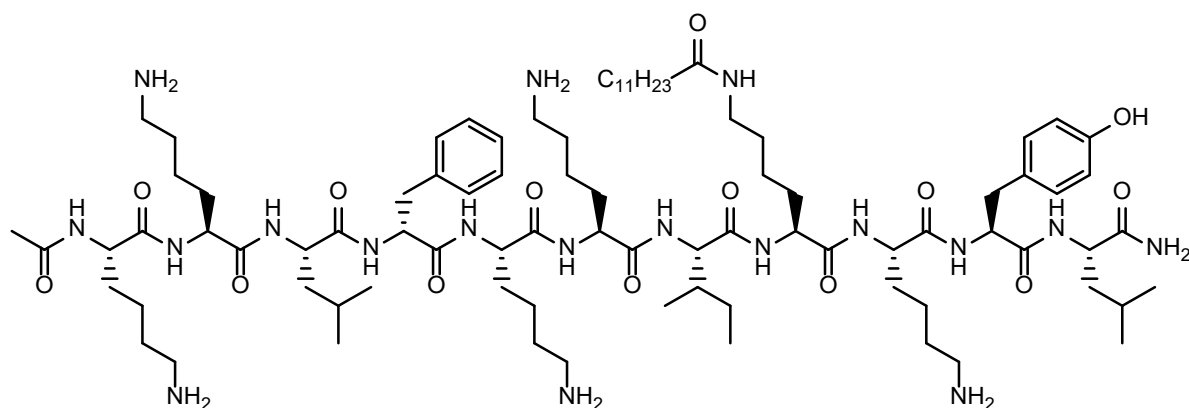

HPLC of crude peptide ( $\lambda=220$  nm)

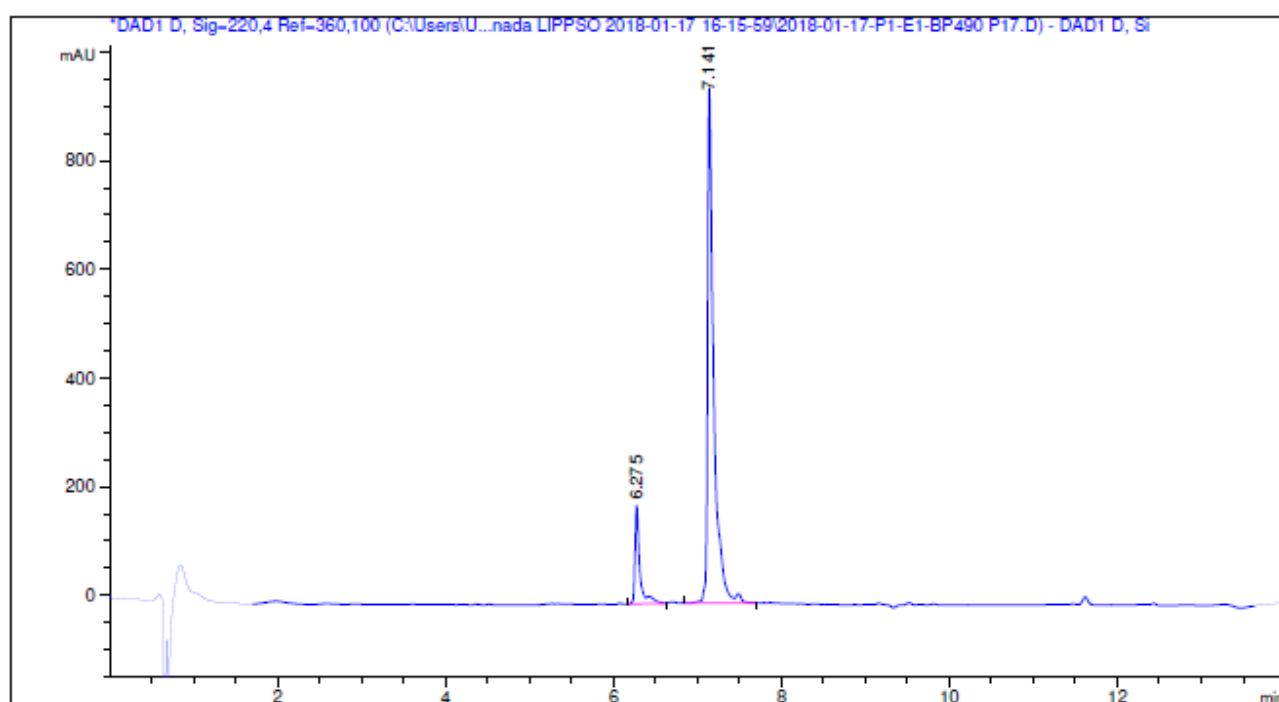

| Peak #   | RetTime [min] | Type | Width [min] | Area [mAU*s] | Height [mAU] | Area %  |
|----------|---------------|------|-------------|--------------|--------------|---------|
| 1        | 6.275         | BV R | 0.0575      | 723.08496    | 181.44606    | 12.9286 |
| 2        | 7.141         | BV R | 0.0729      | 4869.80566   | 948.12061    | 87.0714 |
| Totals : |               |      |             | 5592.89063   | 1129.56667   |         |

# HPLC of purified peptide ( $\lambda=220$ nm)

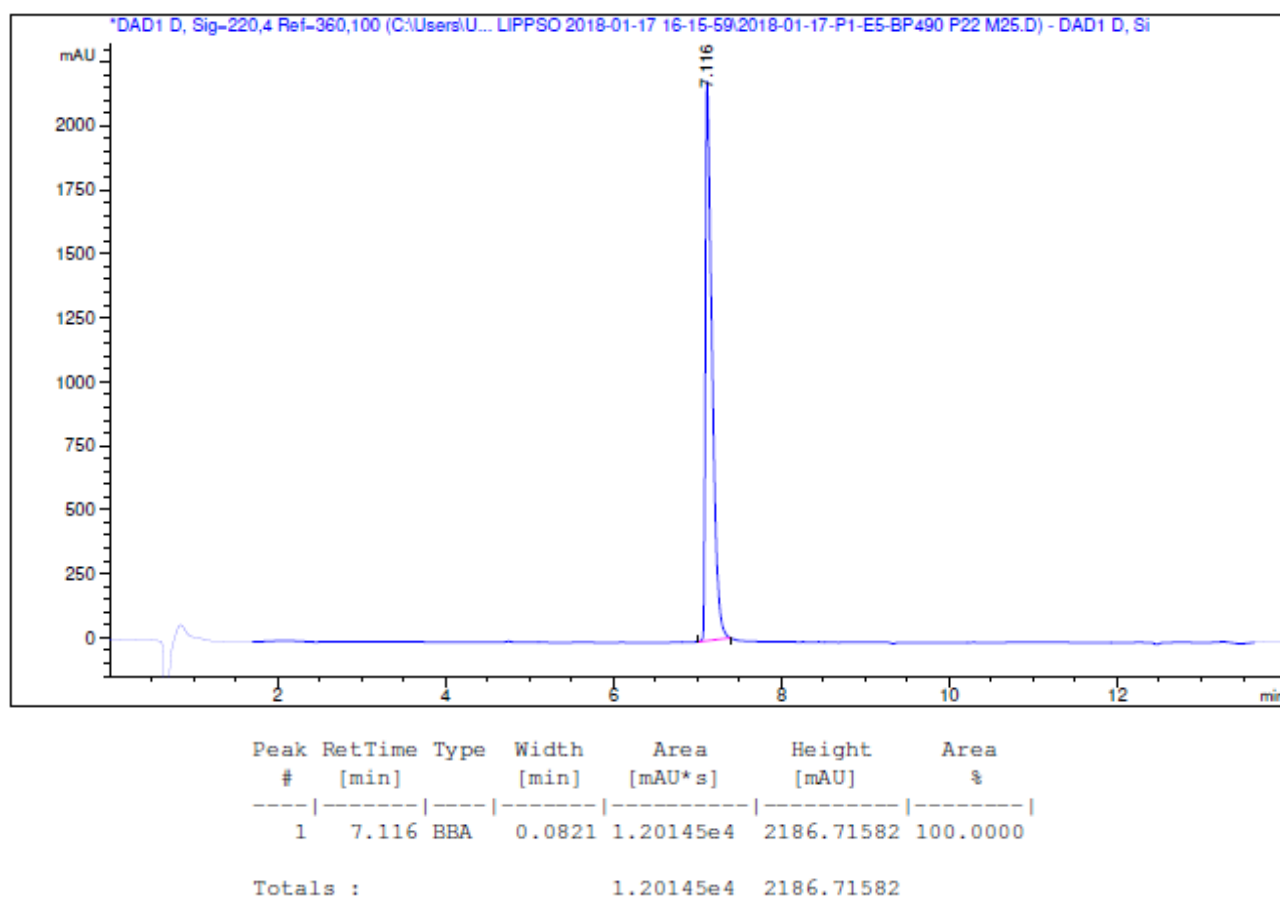

## ESI-MS ( $m/z$ )

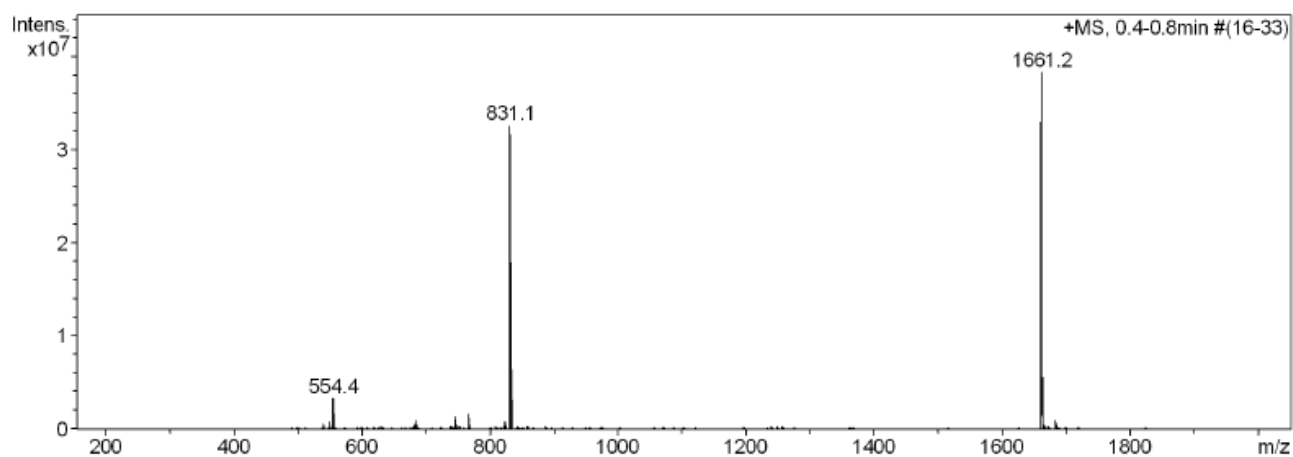

# HRMS ( $m/z$ )

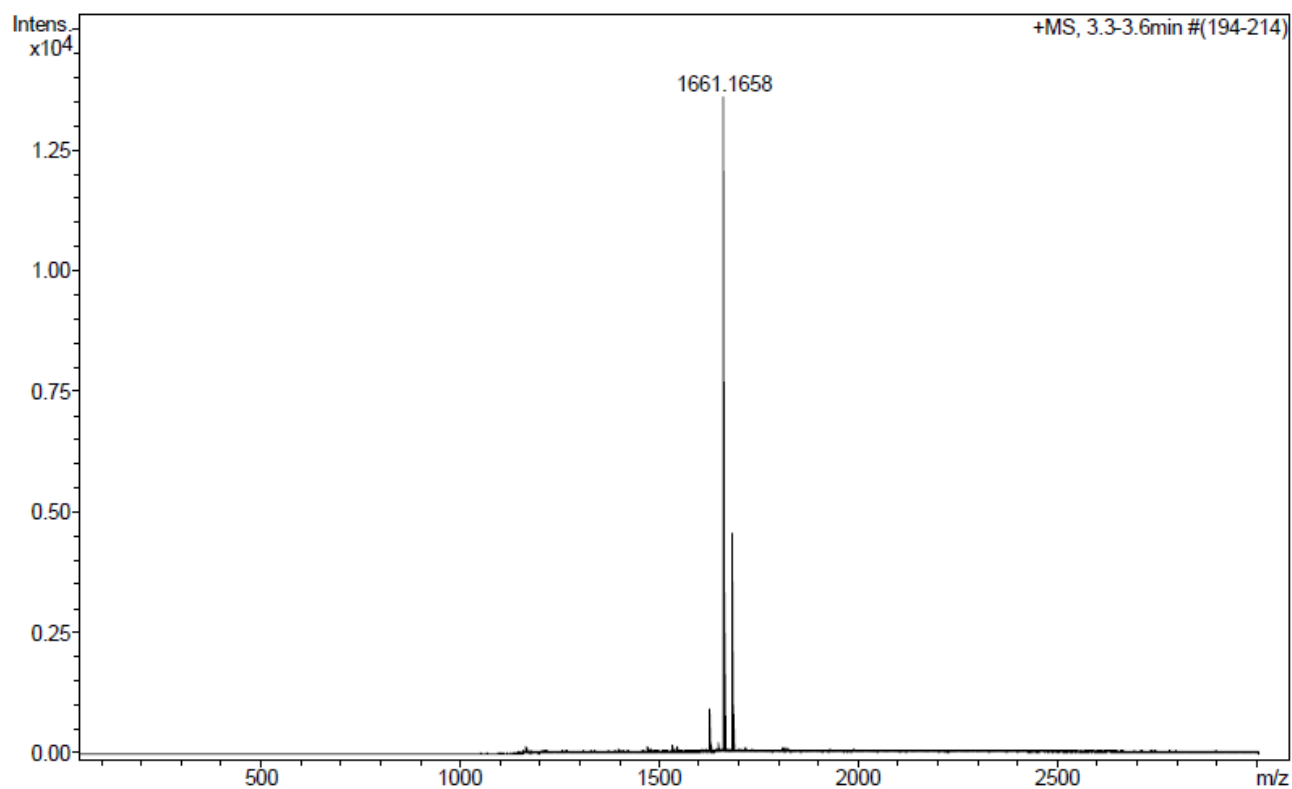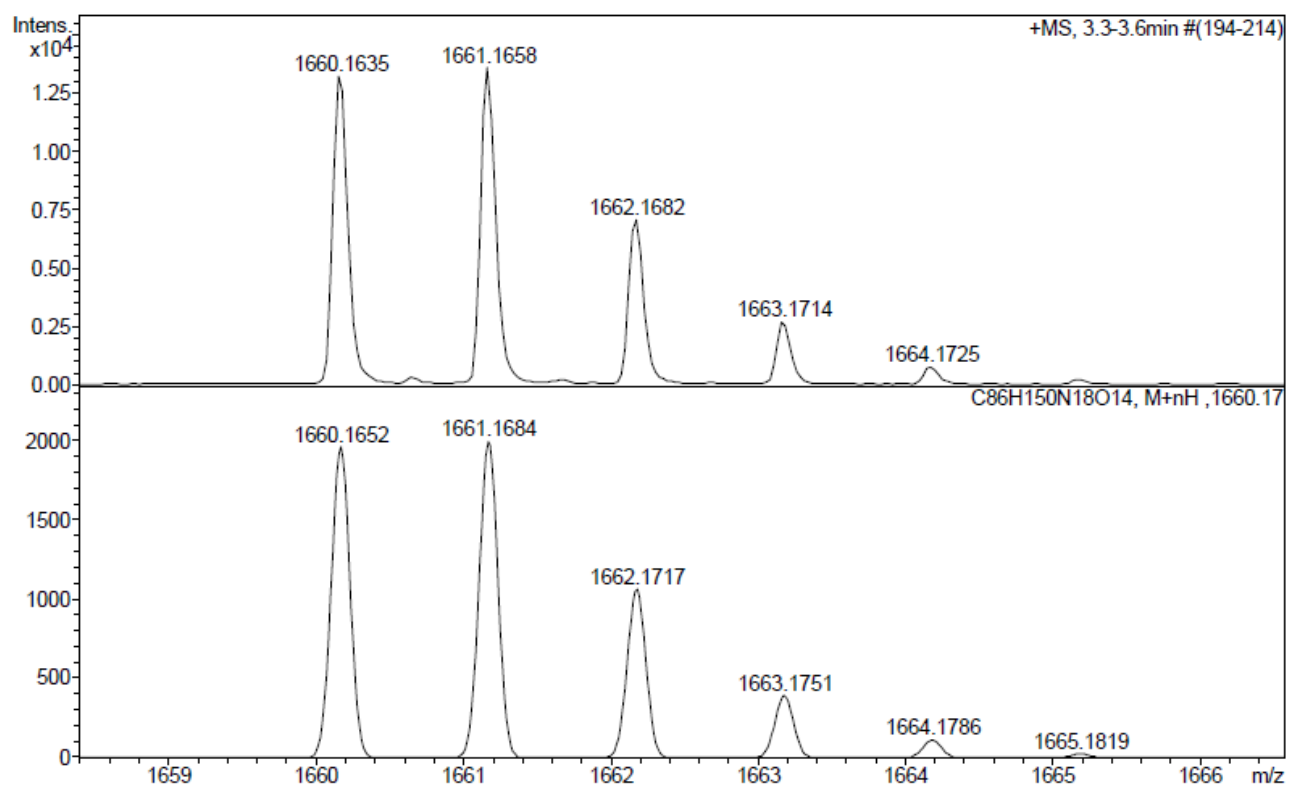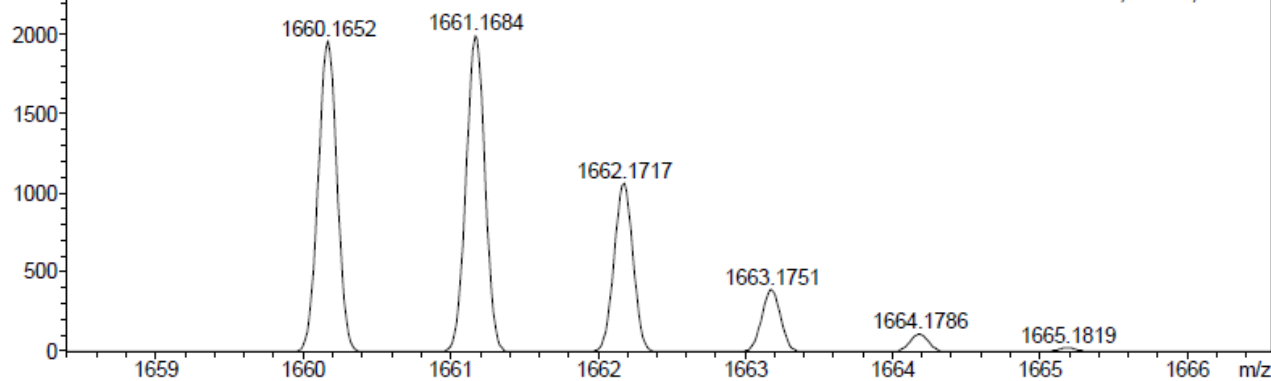

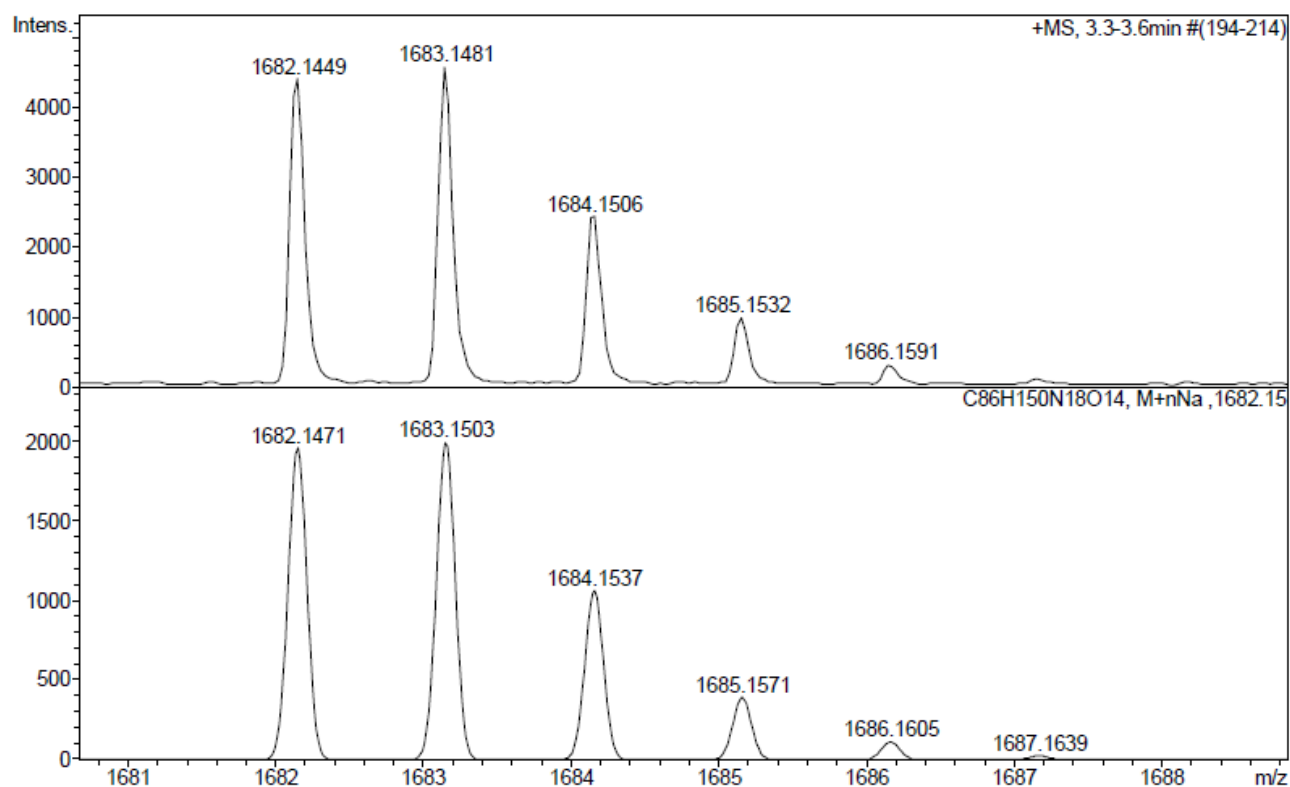

**Ac-Lys-Lys-Leu-D-Phe-Lys-Lys-Lys(COC<sub>5</sub>H<sub>11</sub>)-Leu-Lys-Tyr-Leu-NH<sub>2</sub> (BP494)**

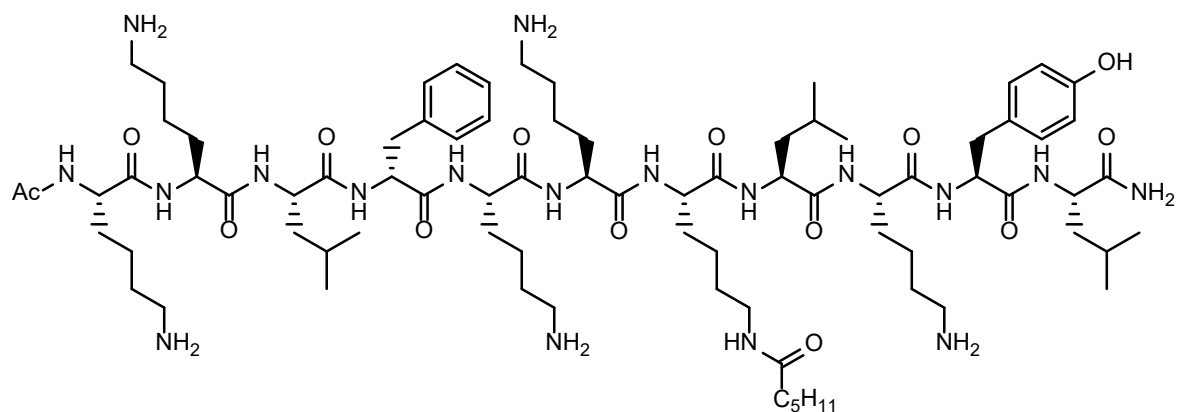

HPLC of crude peptide ( $\lambda=220$  nm)

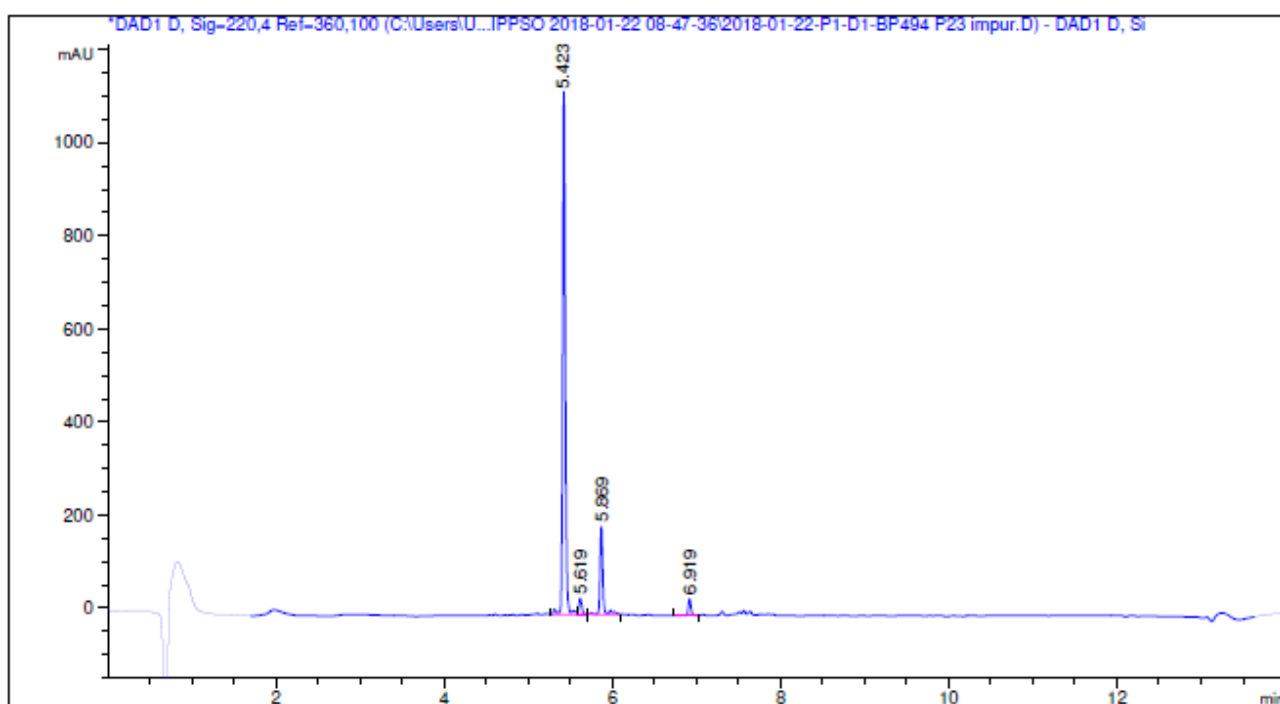

| Peak # | RetTime [min] | Type | Width [min] | Area [mAU*s] | Height [mAU] | Area %  |
|--------|---------------|------|-------------|--------------|--------------|---------|
| 1      | 5.423         | WV R | 0.0340      | 2517.67651   | 1130.30176   | 80.8293 |
| 2      | 5.619         | VB E | 0.0374      | 84.14298     | 34.50963     | 2.7014  |
| 3      | 5.869         | WV R | 0.0346      | 432.04156    | 189.79099    | 13.8706 |
| 4      | 6.919         | WV R | 0.0340      | 80.94740     | 36.32489     | 2.5988  |

Totals : 3114.80846 1390.92727

# HPLC of purified peptide ( $\lambda=220$ nm)

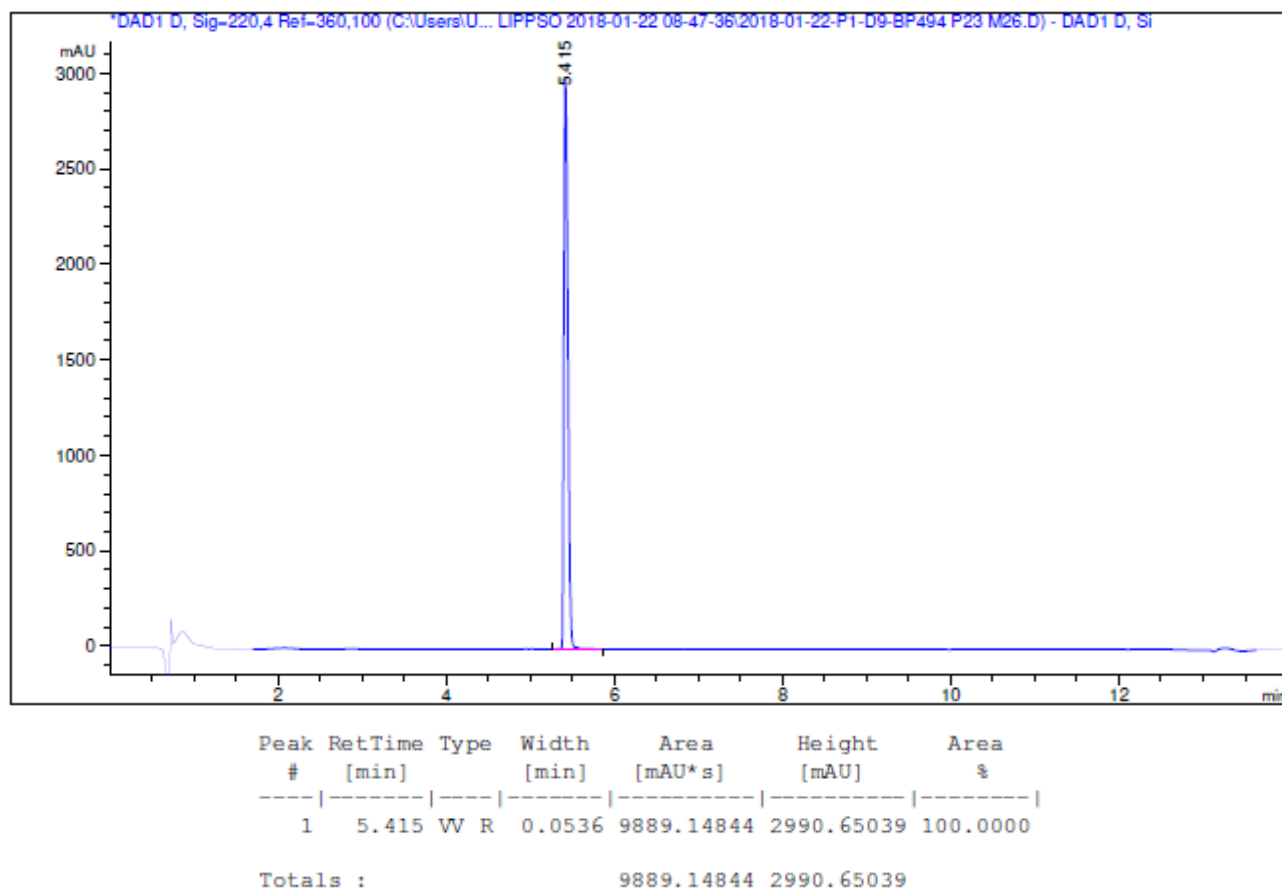

## ESI-MS ( $m/z$ )

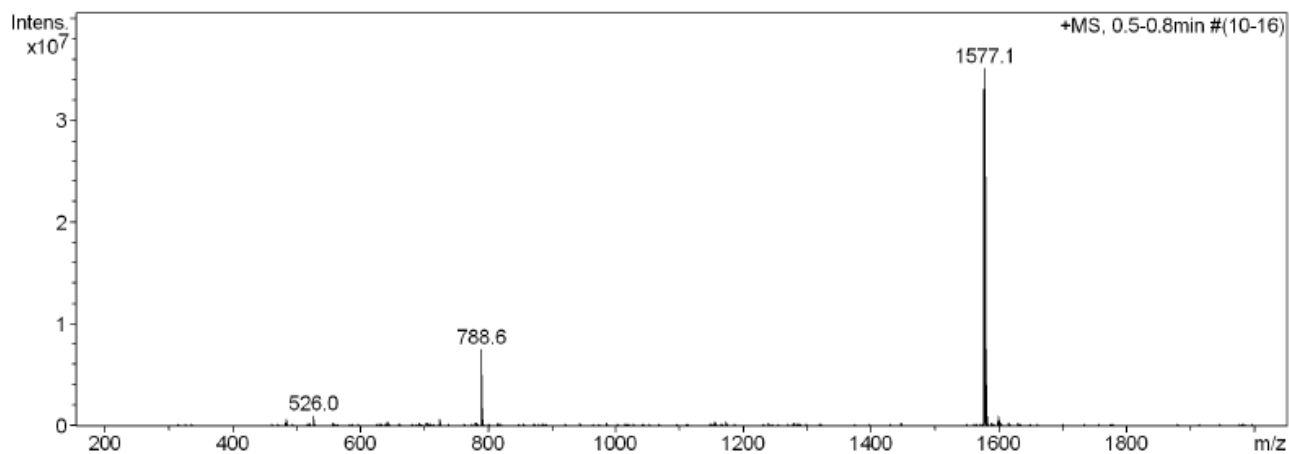



# HRMS ( $m/z$ )

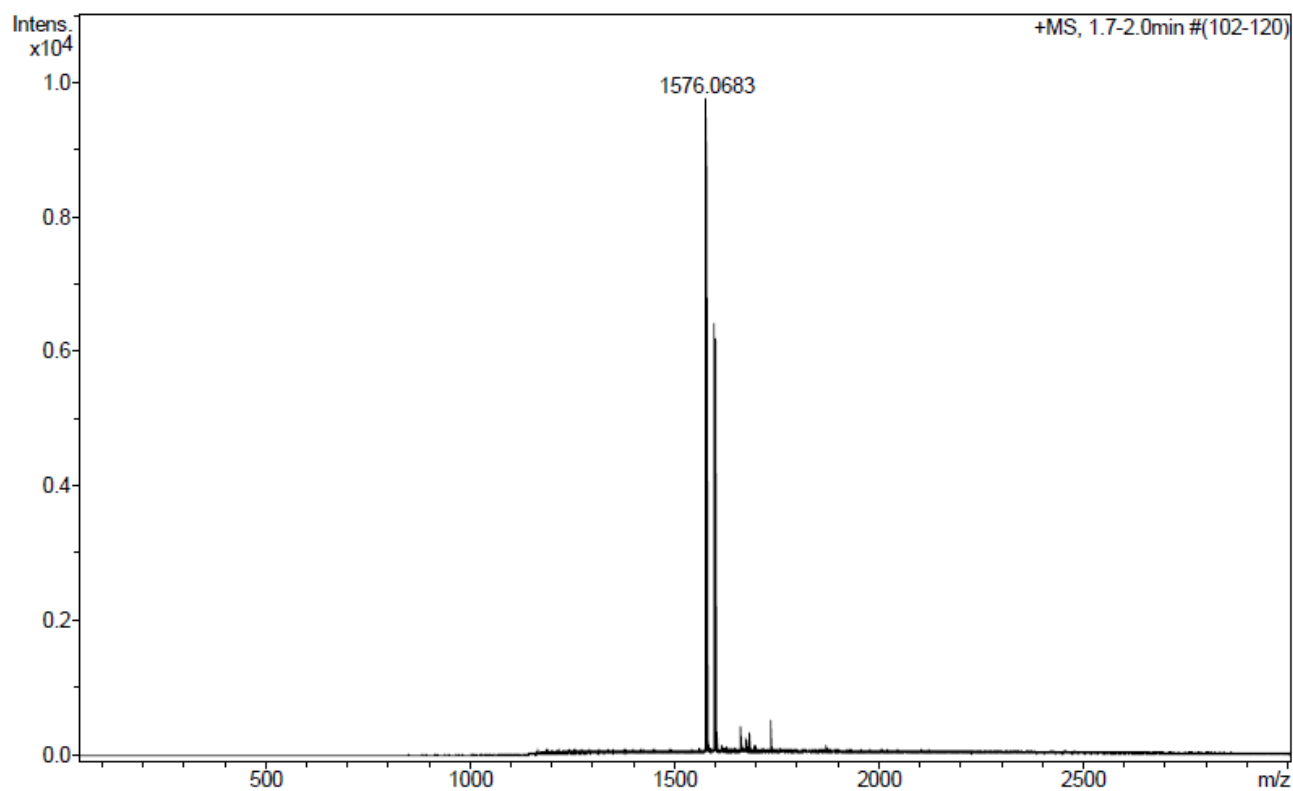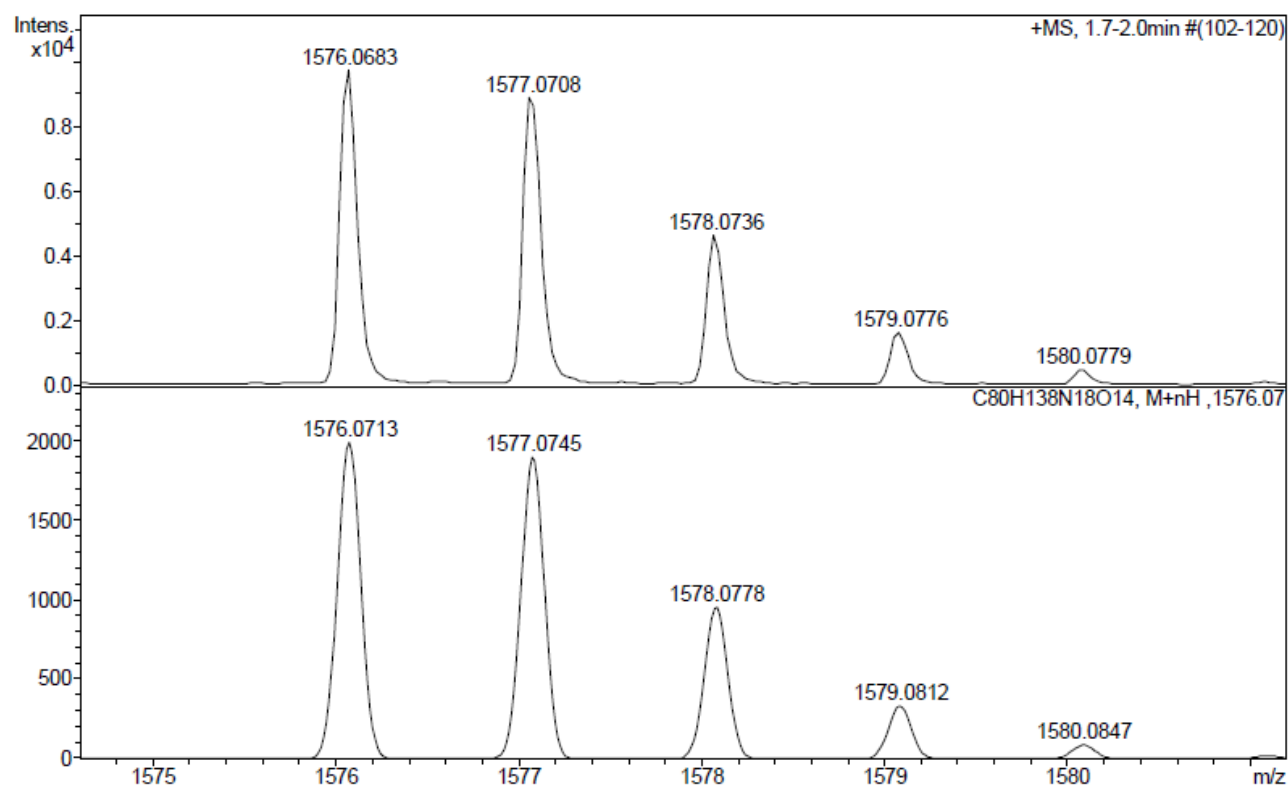

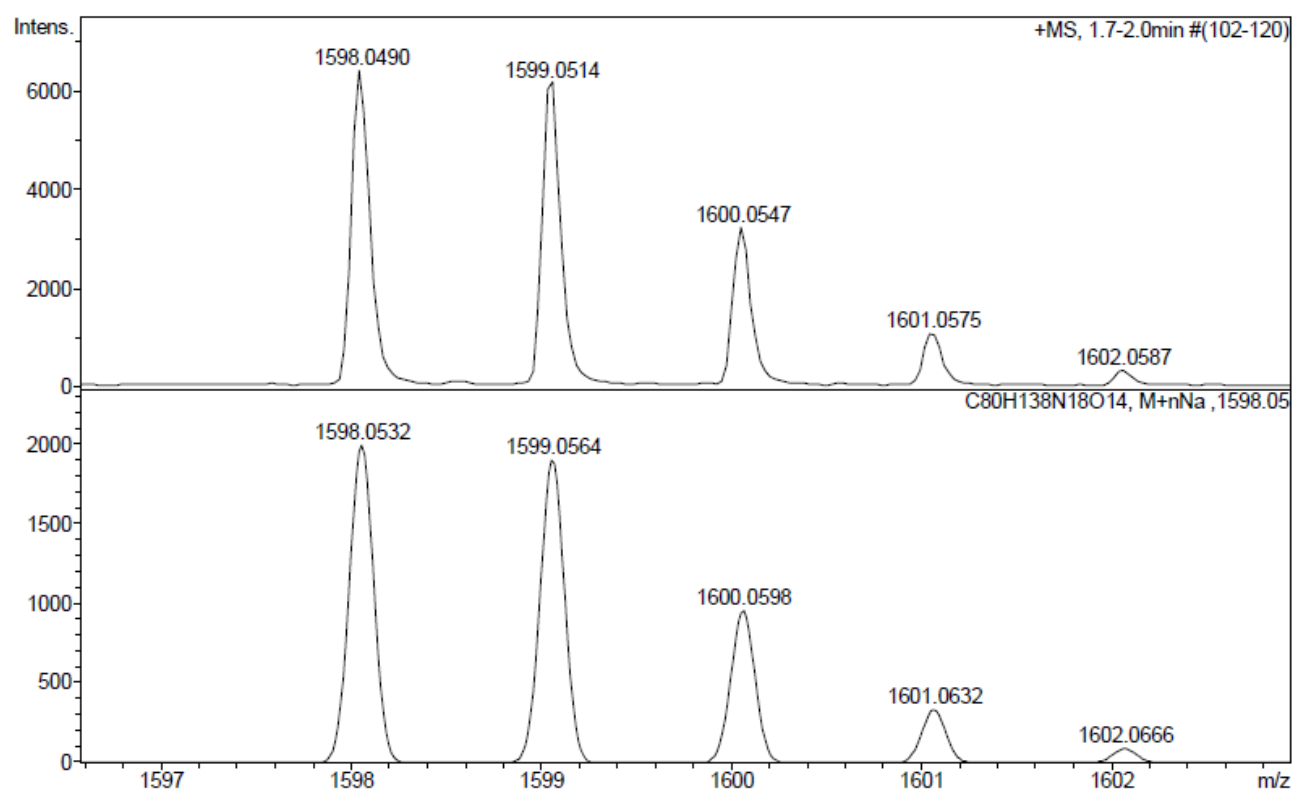

**Ac-Lys-Lys-Leu-D-Phe-Lys-Lys-Ile-Leu-Lys-Tyr-Lys(COC<sub>5</sub>H<sub>11</sub>)-NH<sub>2</sub> (BP495)**

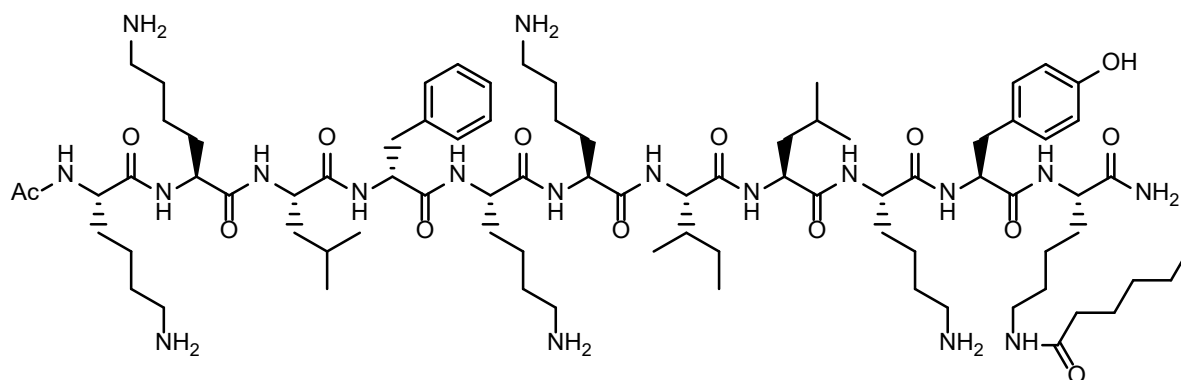

HPLC of crude peptide ( $\lambda=220$  nm)

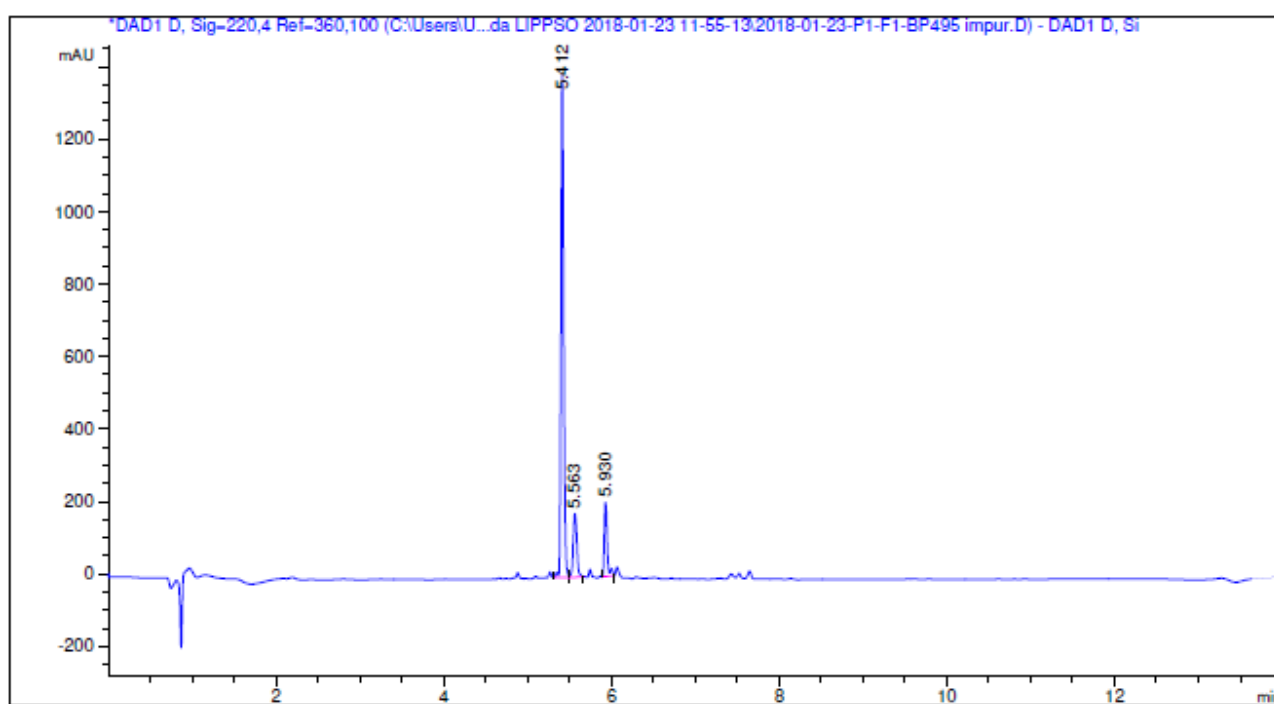

| Peak # | RetTime [min] | Type | Width [min] | Area [mAU*s] | Height [mAU] | Area %  |
|--------|---------------|------|-------------|--------------|--------------|---------|
| 1      | 5.412         | VV R | 0.0356      | 3169.20239   | 1389.56665   | 75.7298 |
| 2      | 5.563         | VB   | 0.0487      | 535.45313    | 174.93906    | 12.7949 |
| 3      | 5.930         | BV R | 0.0353      | 480.22589    | 204.92200    | 11.4753 |

Totals : 4184.88141 1769.42770

# HPLC of purified peptide ( $\lambda=220$ nm)

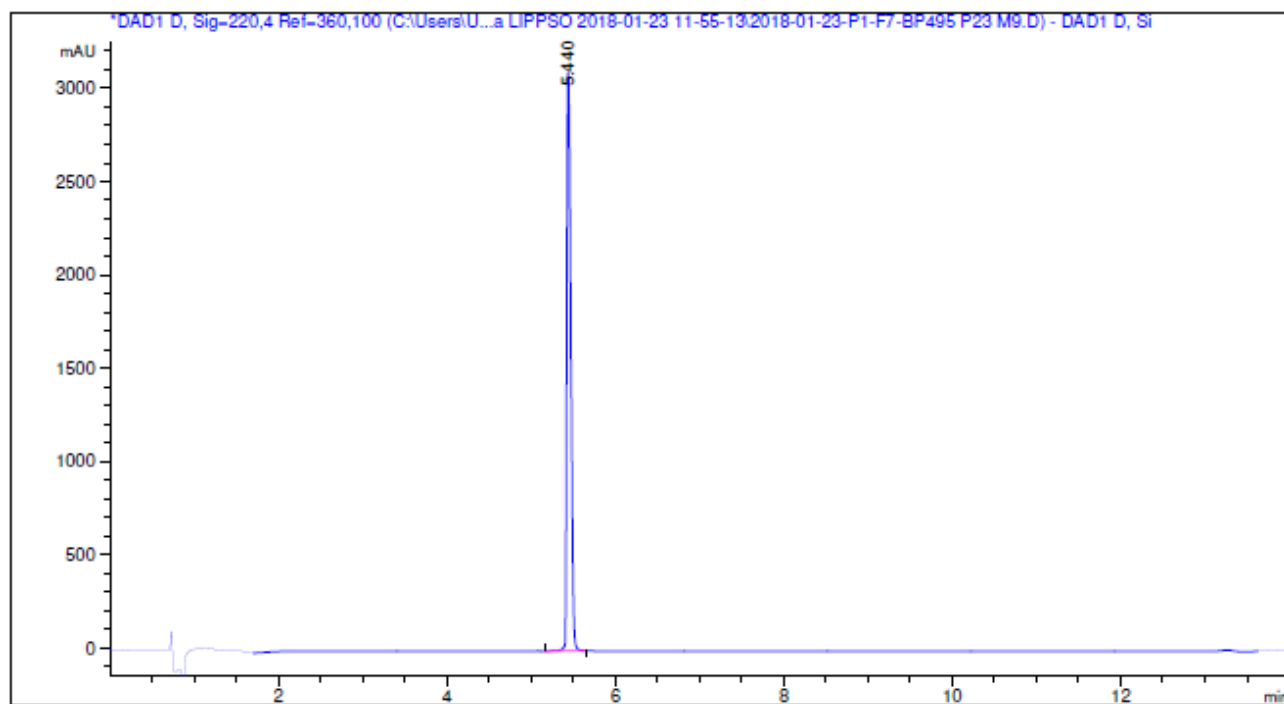

| Peak #   | RetTime [min] | Type | Width [min] | Area [mAU*s] | Height [mAU] | Area %   |
|----------|---------------|------|-------------|--------------|--------------|----------|
| 1        | 5.440         | VB R | 0.0545      | 1.04920e4    | 3101.66650   | 100.0000 |
| Totals : |               |      |             | 1.04920e4    | 3101.66650   |          |

## ESI-MS ( $m/z$ )

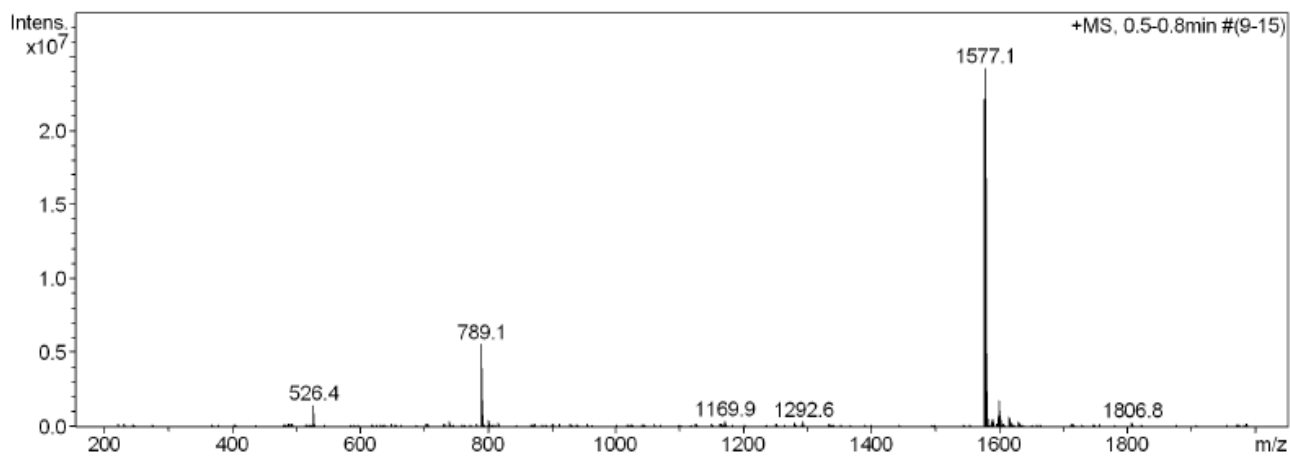

# HRMS ( $m/z$ )

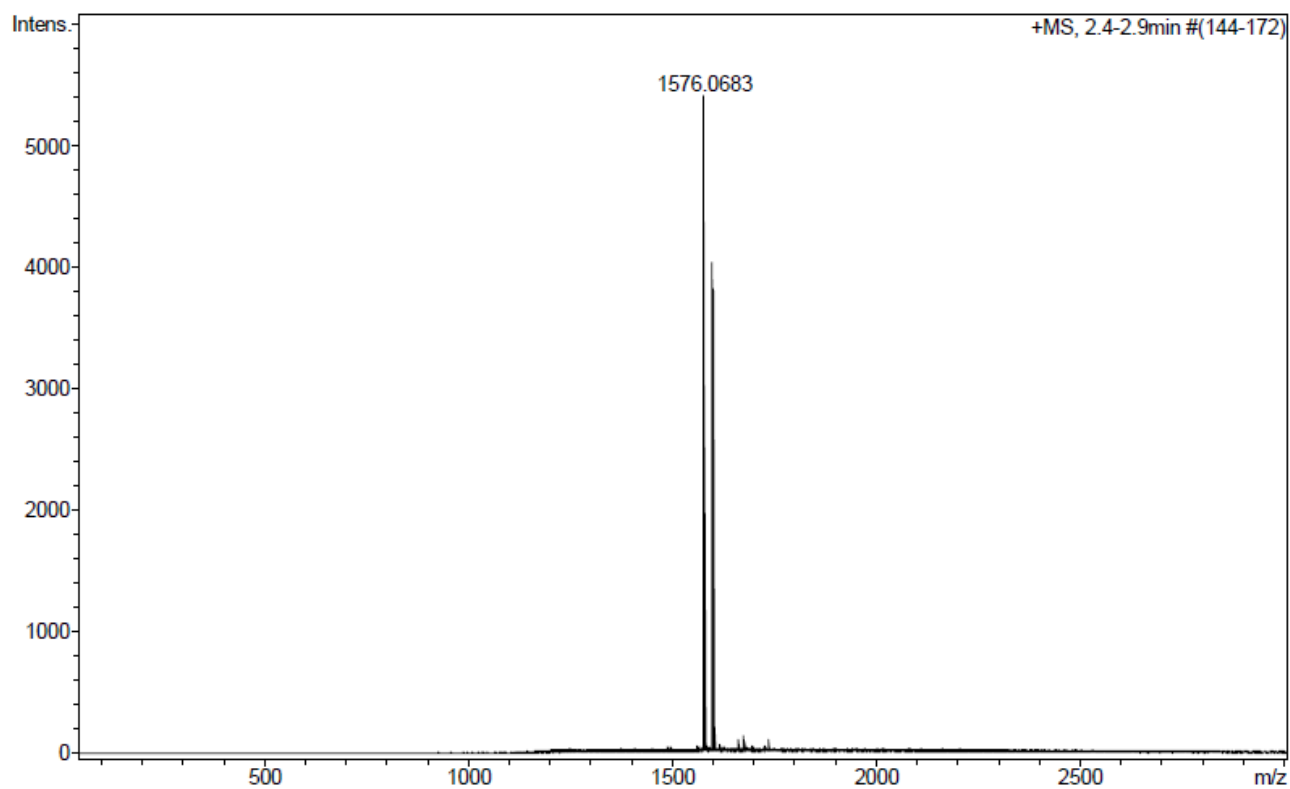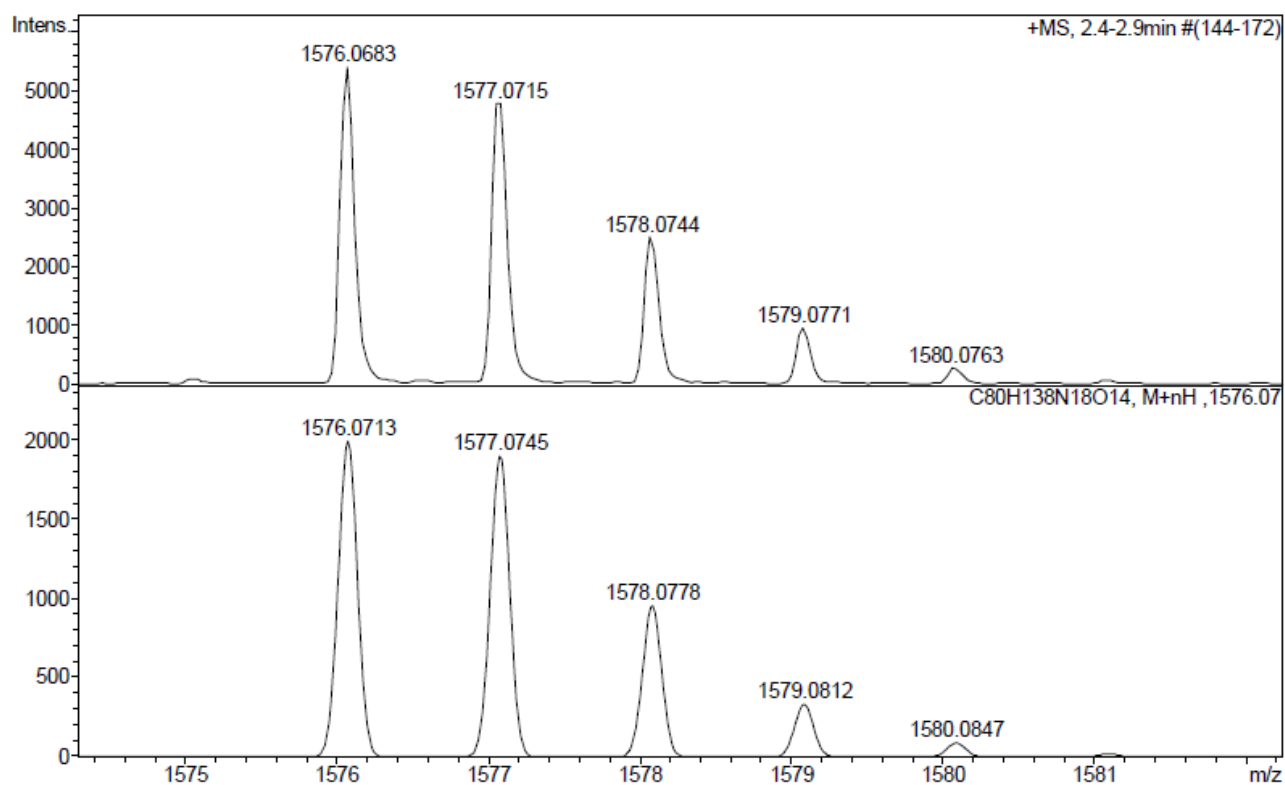

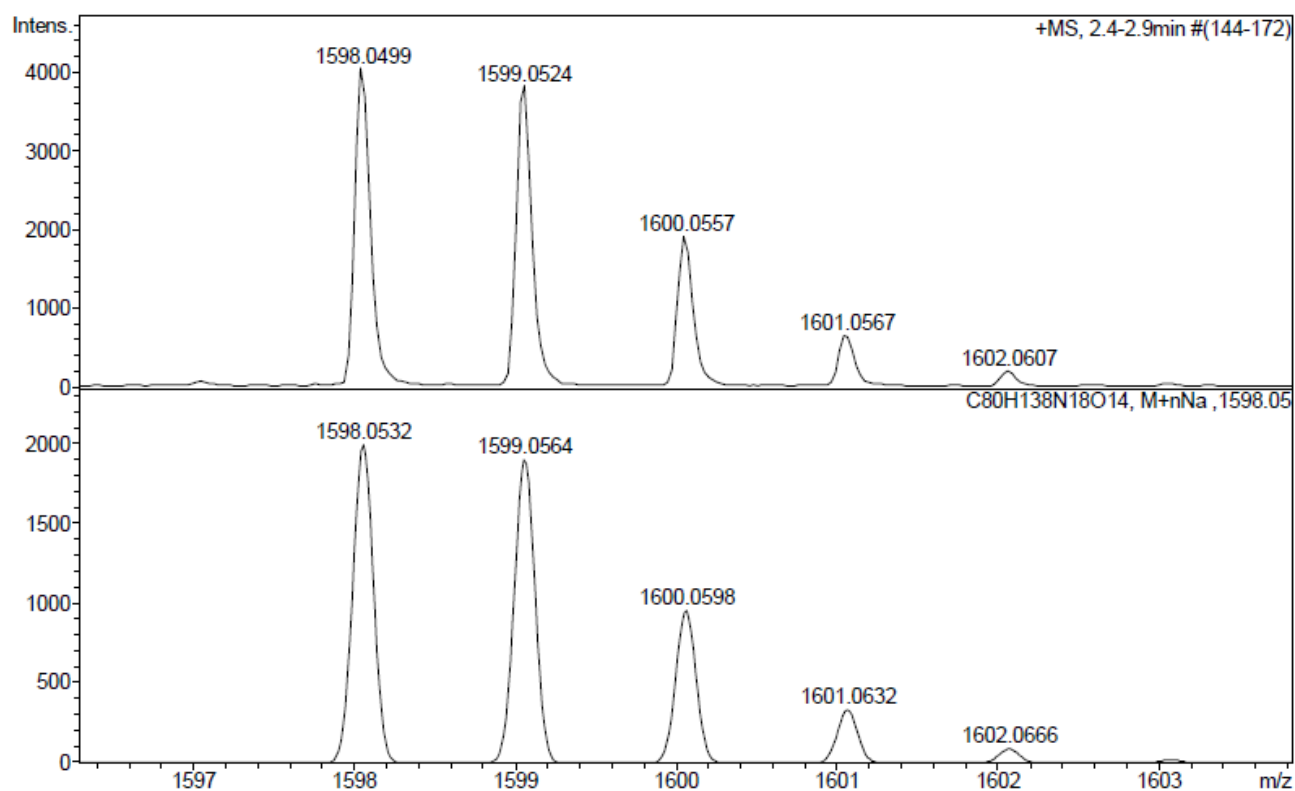

**Ac-Lys-Lys-Leu-D-Phe-Lys-Lys-Ile-Leu-Lys-Tyr-Lys(COC<sub>3</sub>H<sub>7</sub>)-NH<sub>2</sub> (BP496)**

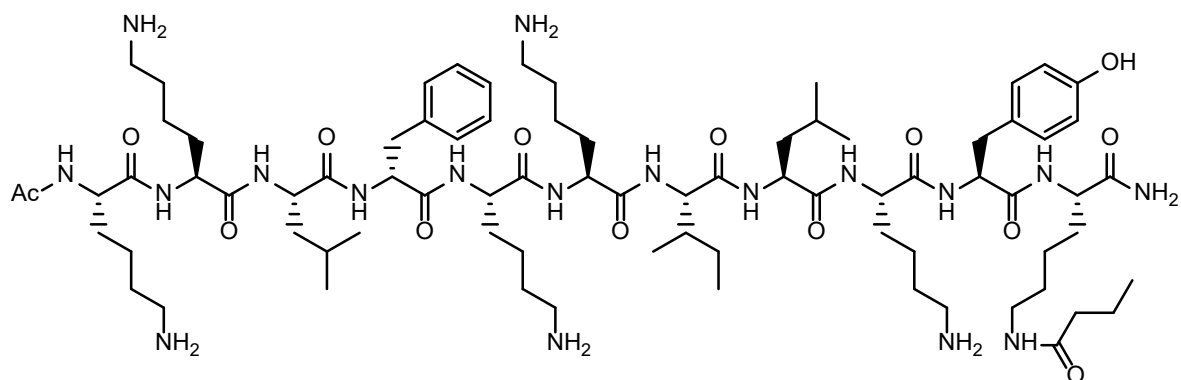

HPLC of crude peptide ( $\lambda=220$  nm)

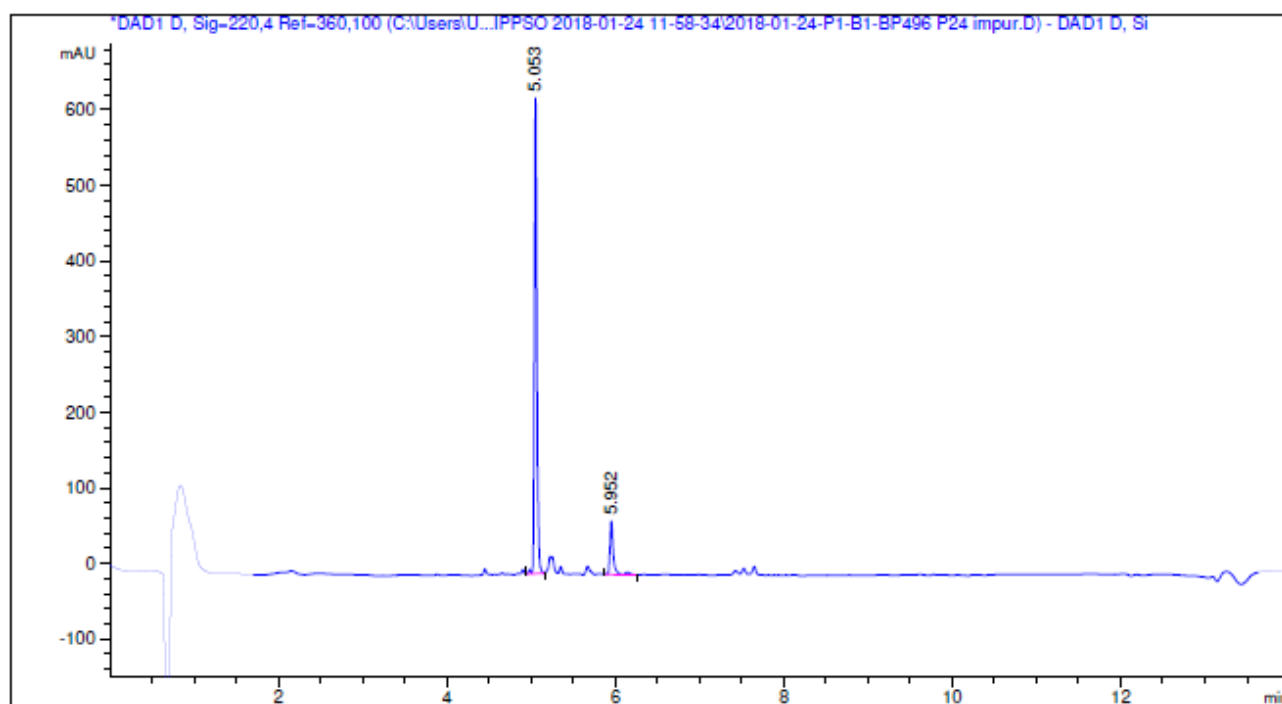

| Peak #   | RetTime [min] | Type | Width [min] | Area [mAU*s] | Height [mAU] | Area %  |
|----------|---------------|------|-------------|--------------|--------------|---------|
| 1        | 5.053         | VB R | 0.0325      | 1323.29224   | 630.92993    | 86.8886 |
| 2        | 5.952         | VV R | 0.0419      | 199.68292    | 70.85992     | 13.1114 |
| Totals : |               |      |             | 1522.97516   | 701.78985    |         |

# HPLC of purified peptide ( $\lambda=220$ nm)

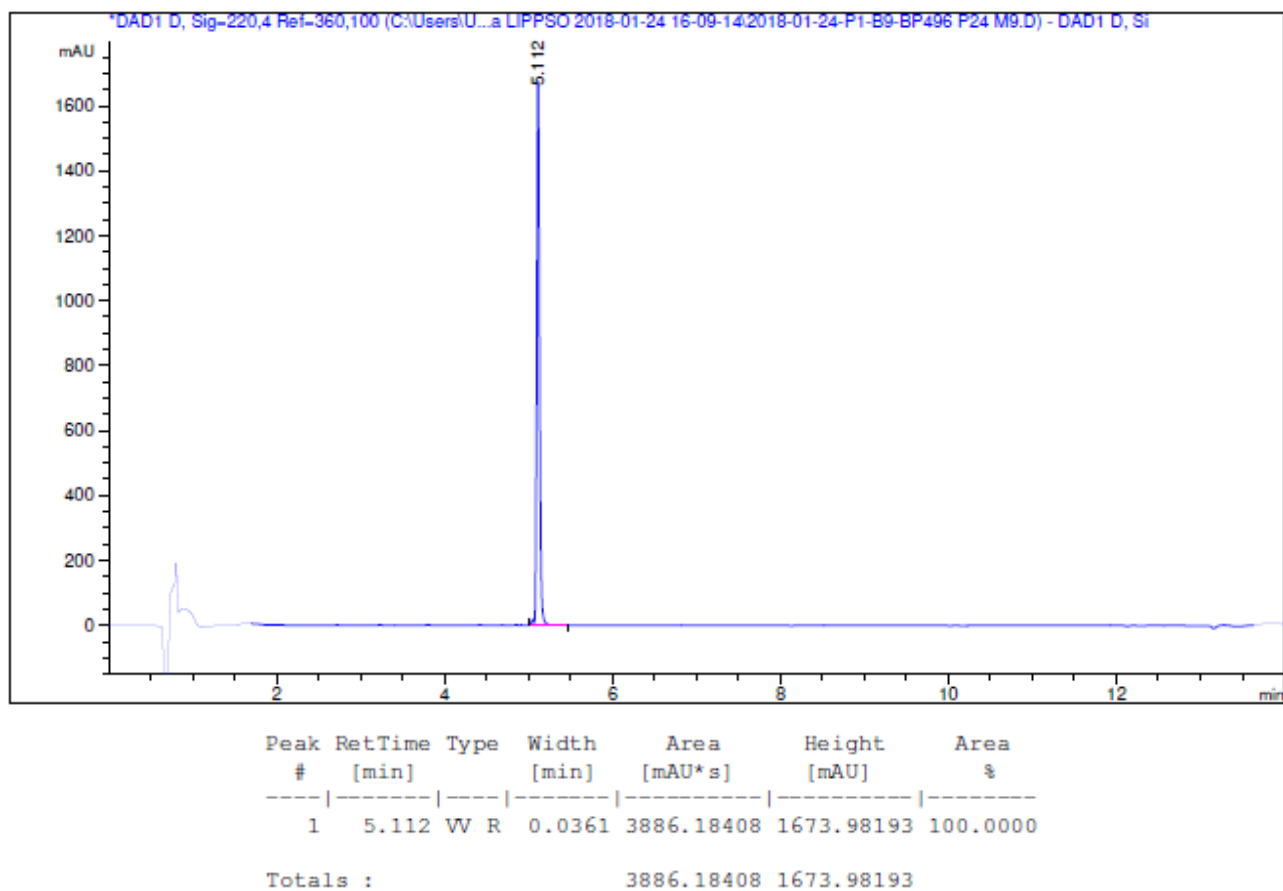

## ESI-MS ( $m/z$ )

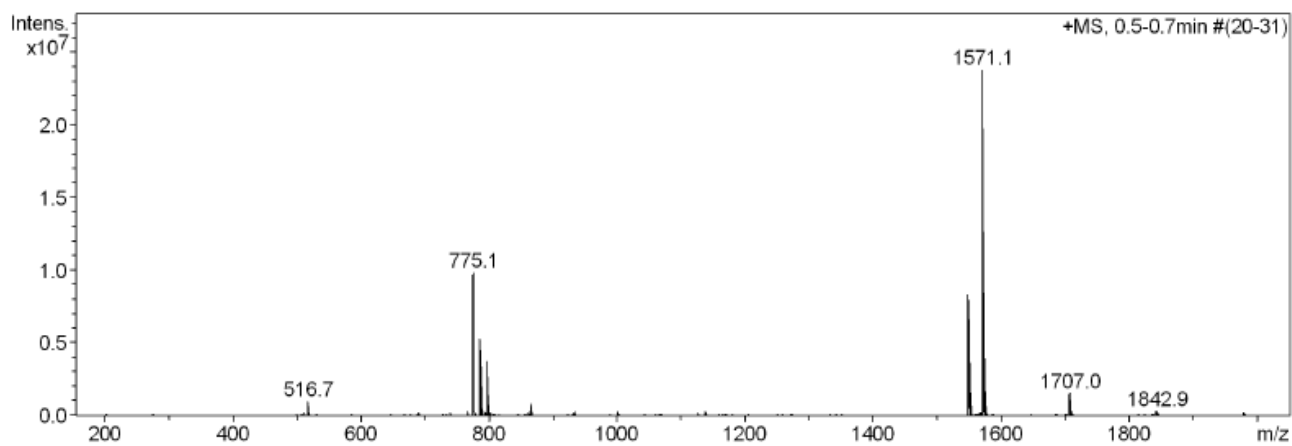



# HRMS ( $m/z$ )

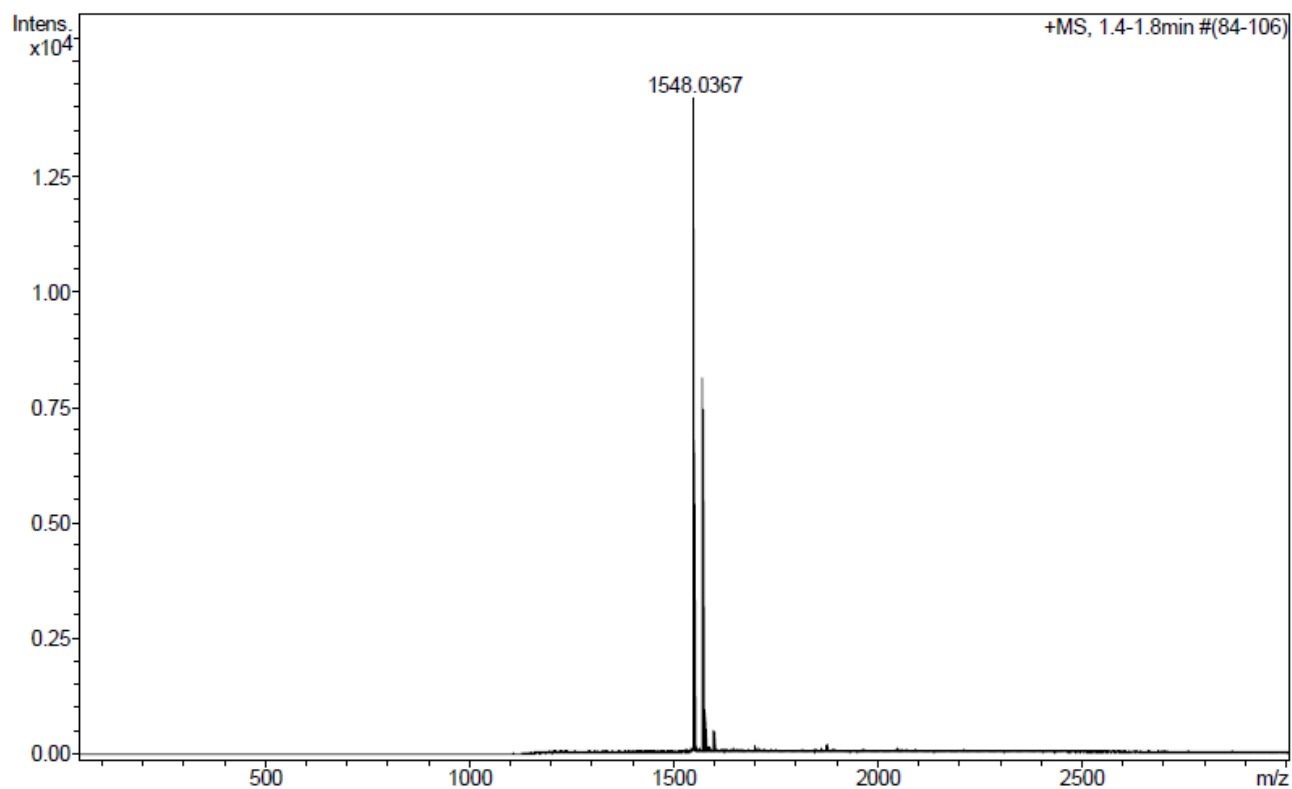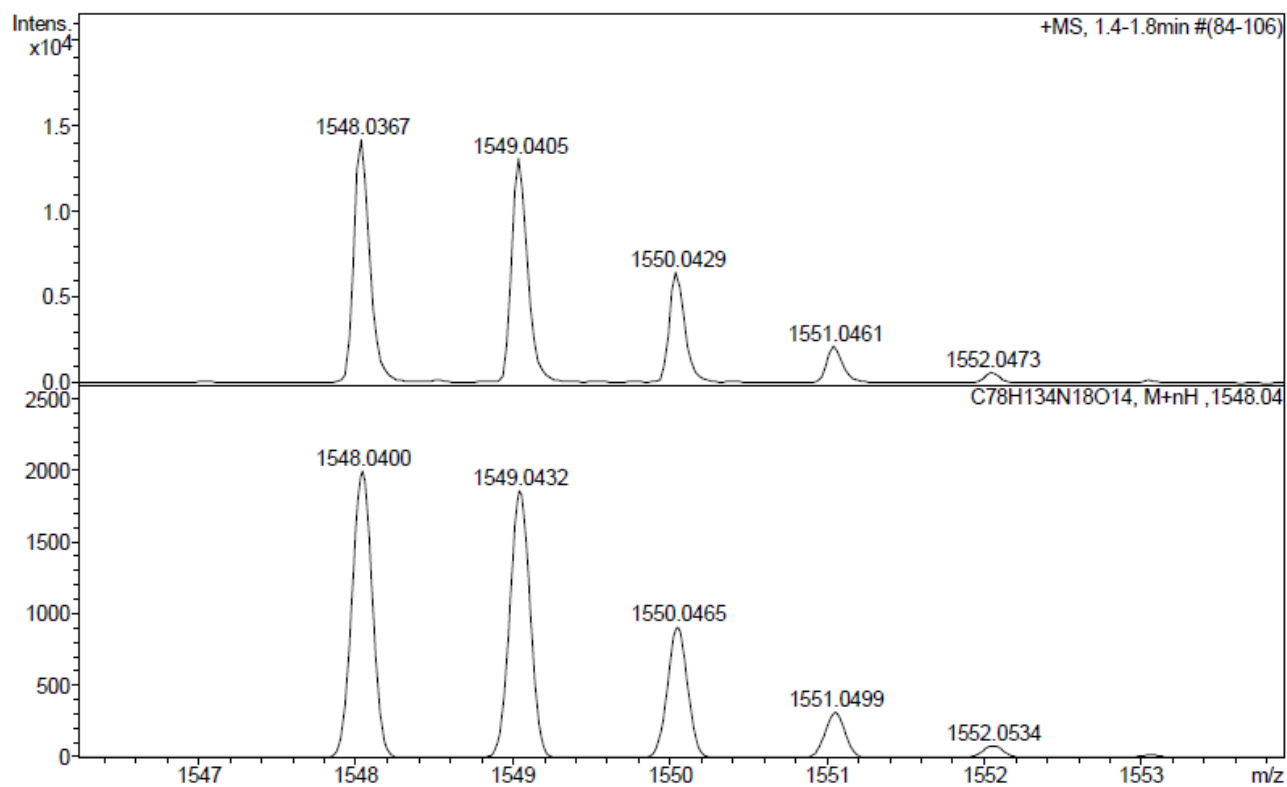

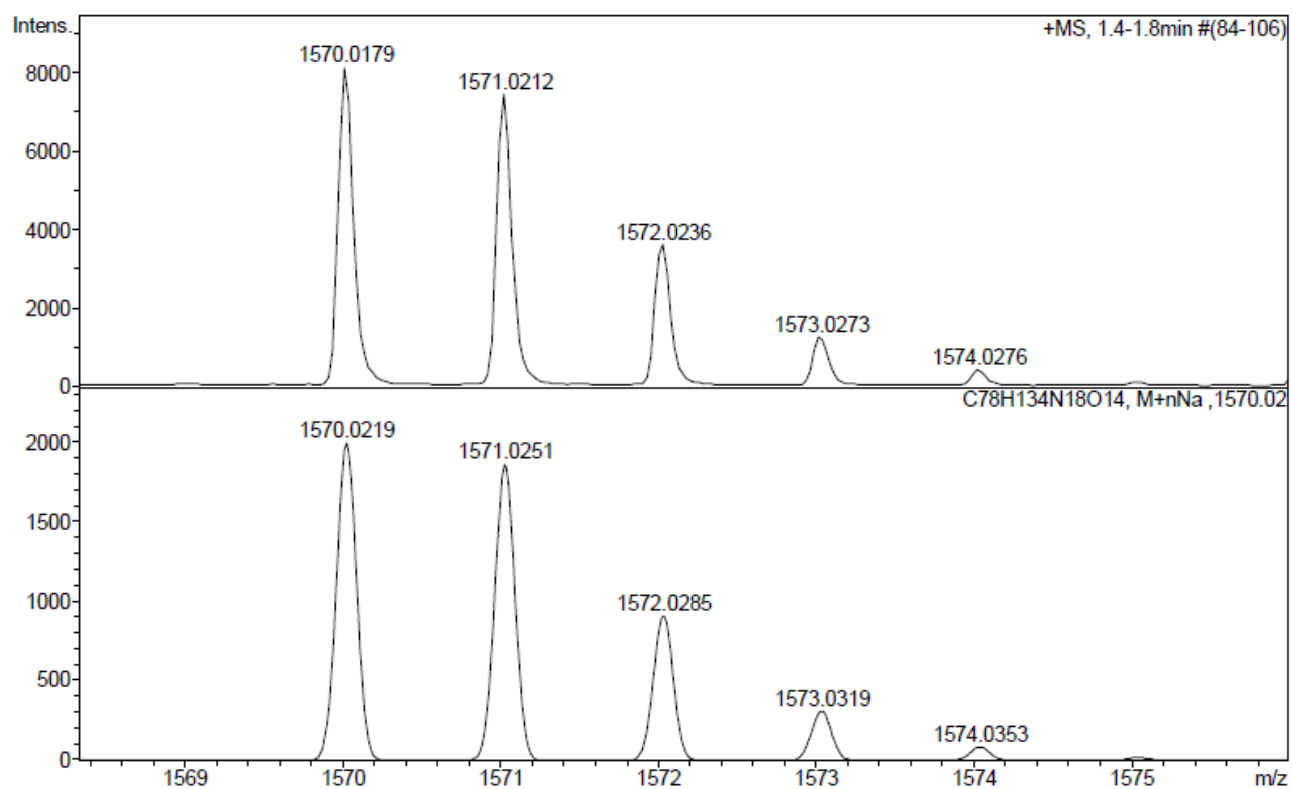

**Ac-Lys-Lys-Leu-D-Phe-Lys-Lys-Ile-Leu-Lys(COC<sub>11</sub>H<sub>23</sub>)-Tyr-Leu-NH<sub>2</sub> (BP497)**

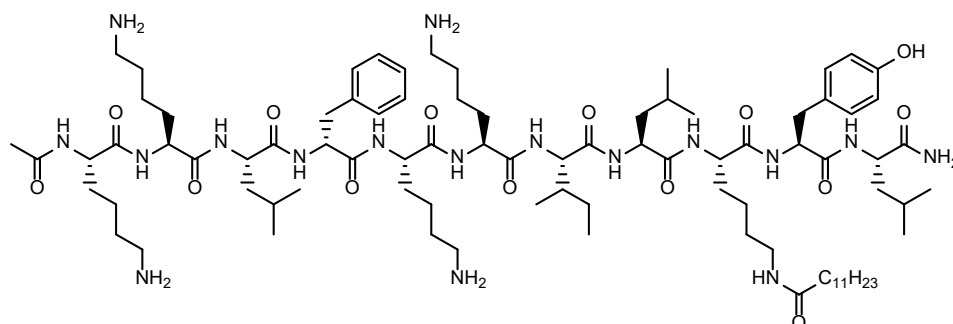

HPLC of crude peptide ( $\lambda=220$  nm)

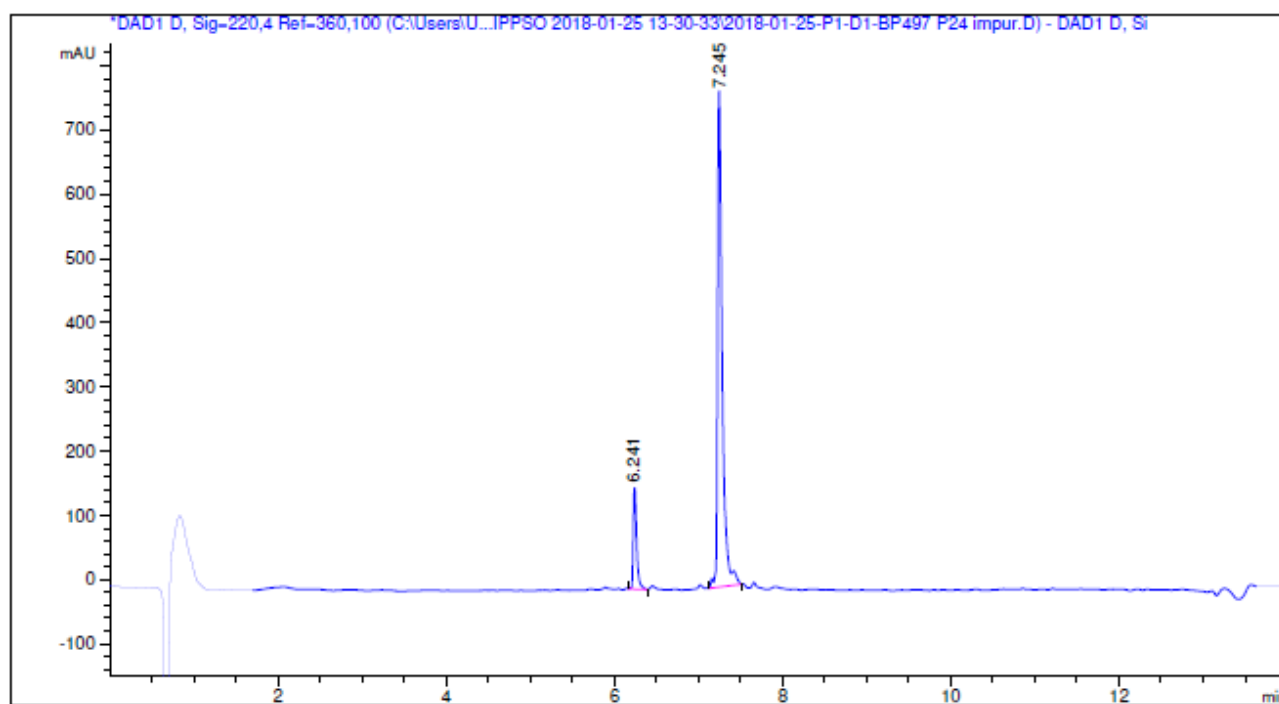

| Peak # | RetTime [min] | Type | Width [min] | Area [mAU*s] | Height [mAU] | Area %  |
|--------|---------------|------|-------------|--------------|--------------|---------|
| 1      | 6.241         | VB R | 0.0399      | 431.05203    | 157.88124    | 12.7336 |
| 2      | 7.245         | W R  | 0.0556      | 2954.10278   | 772.97687    | 87.2664 |

Totals : 3385.15482 930.85811

# HPLC of purified peptide ( $\lambda=220$ nm)

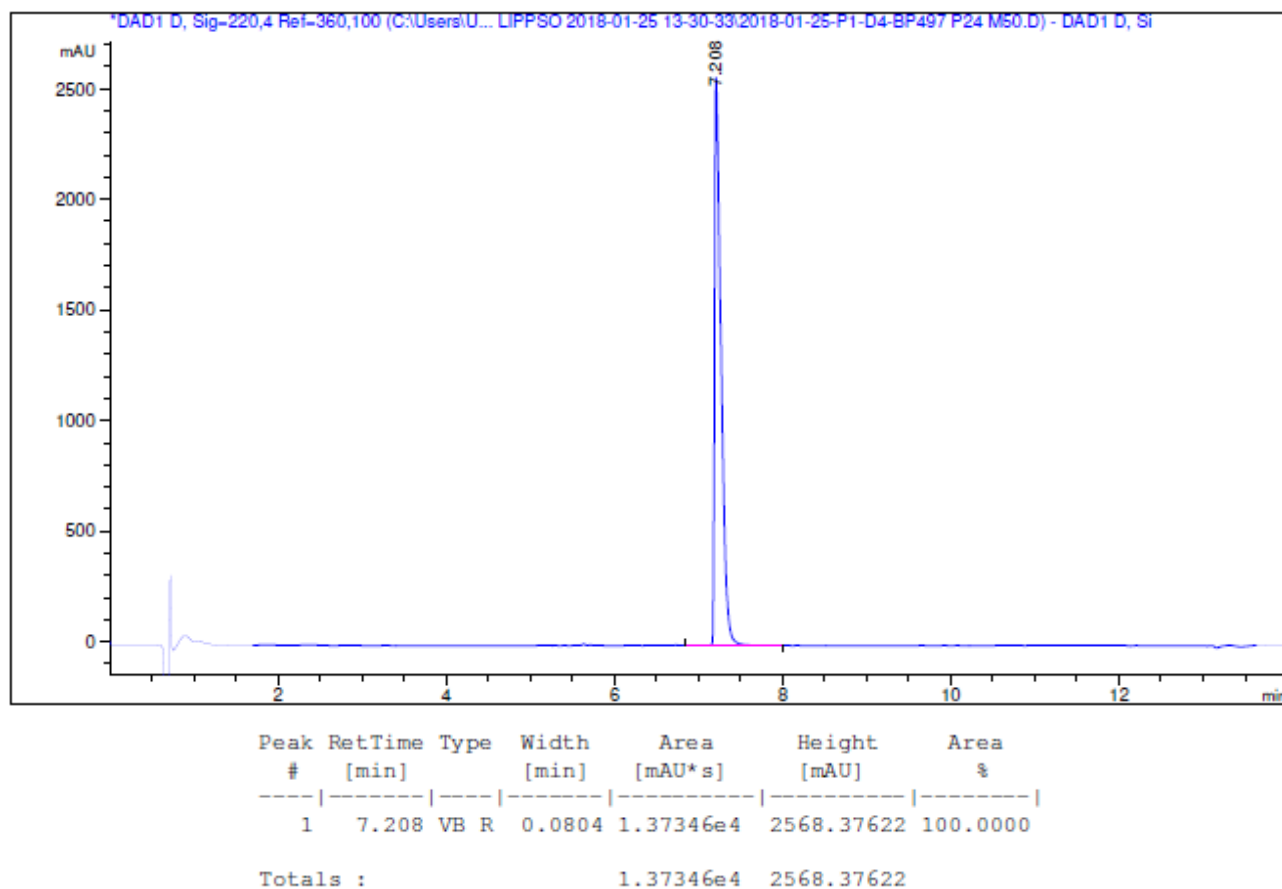

## ESI-MS ( $m/z$ )

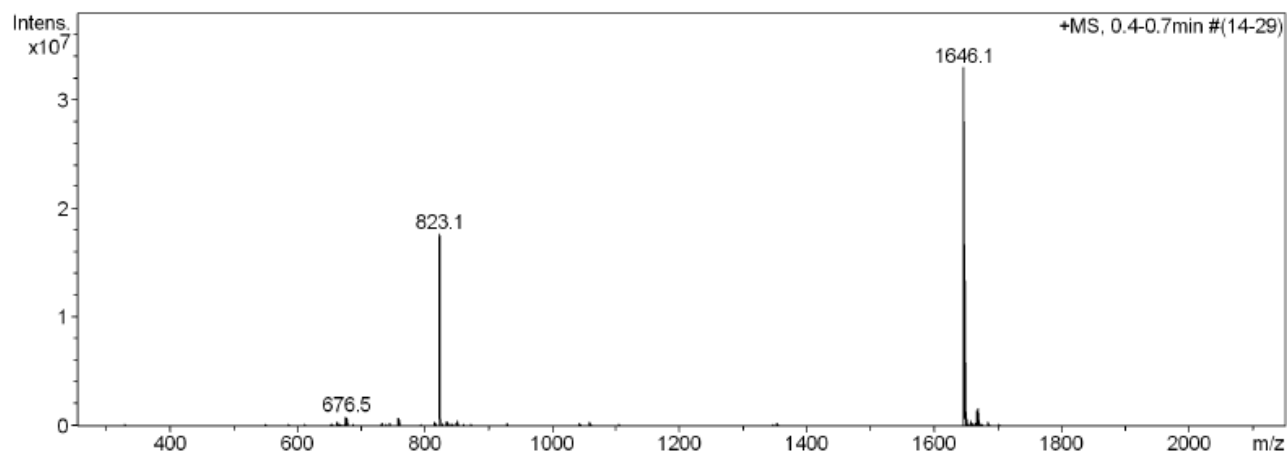

# HRMS ( $m/z$ )

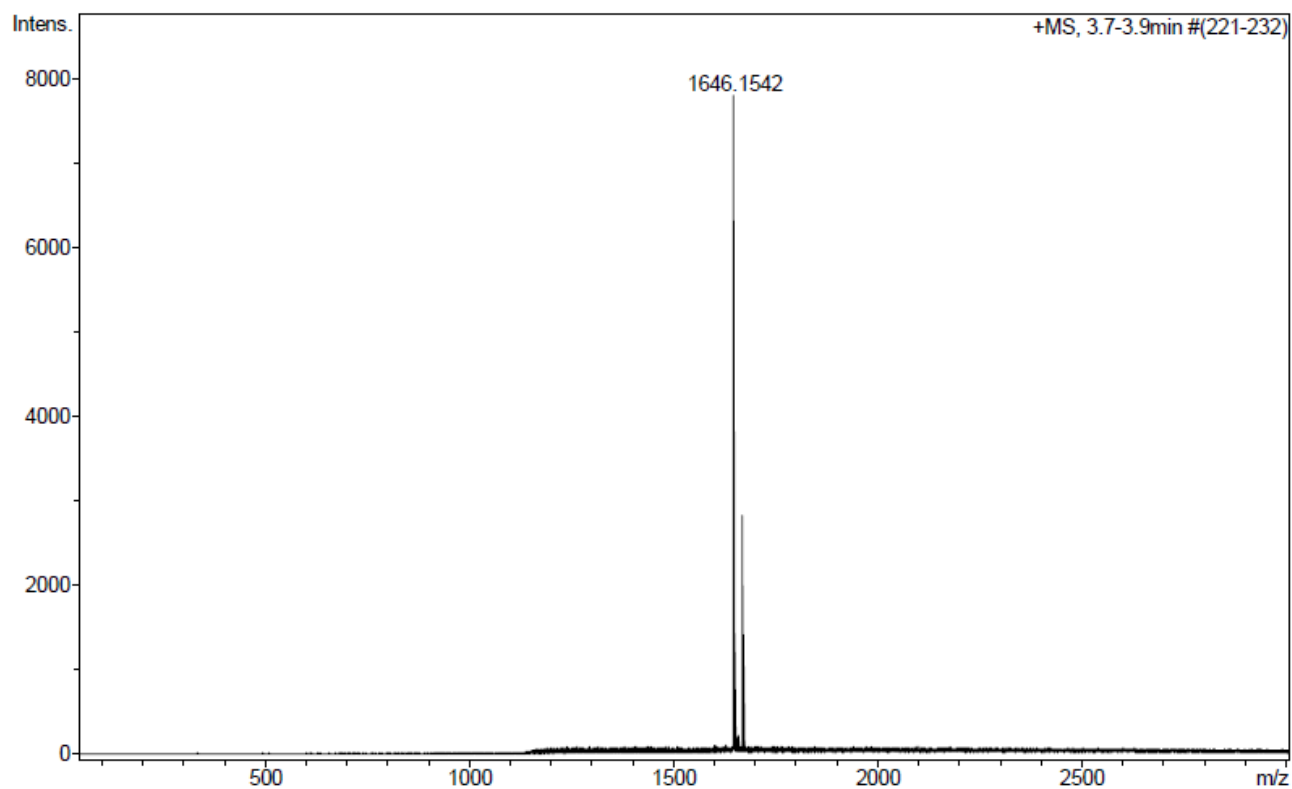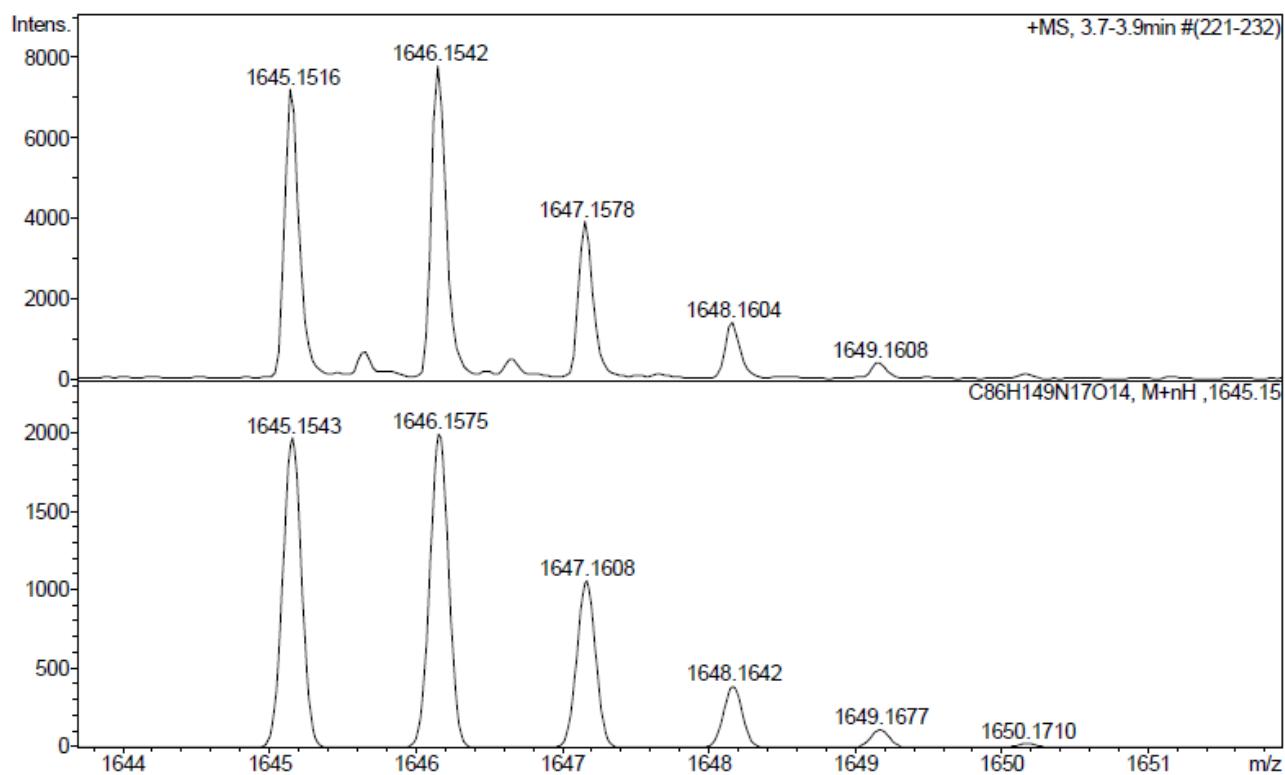

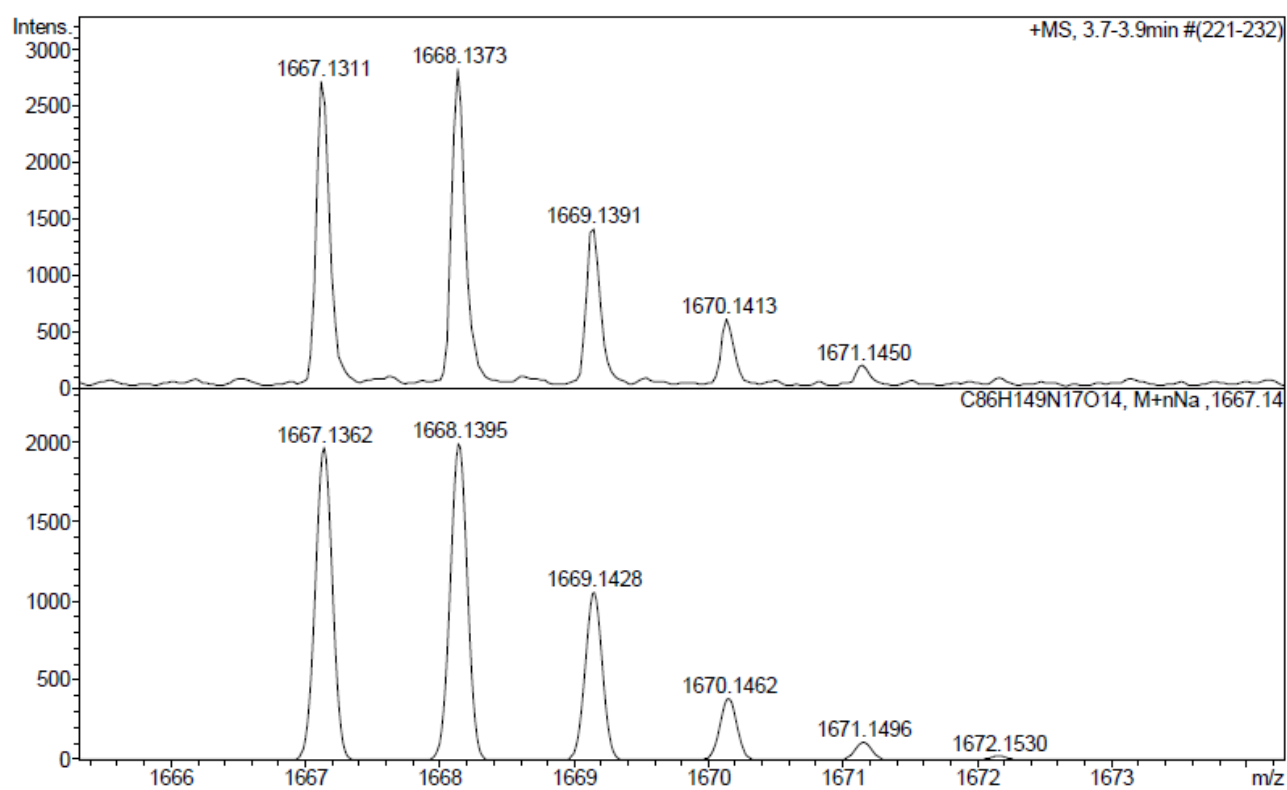

**Ac-Lys-Lys-Leu-D-Phe-Lys(COC<sub>3</sub>H<sub>7</sub>)-Lys-Ile-Leu-Lys-Tyr-Leu-NH<sub>2</sub> (BP498)**

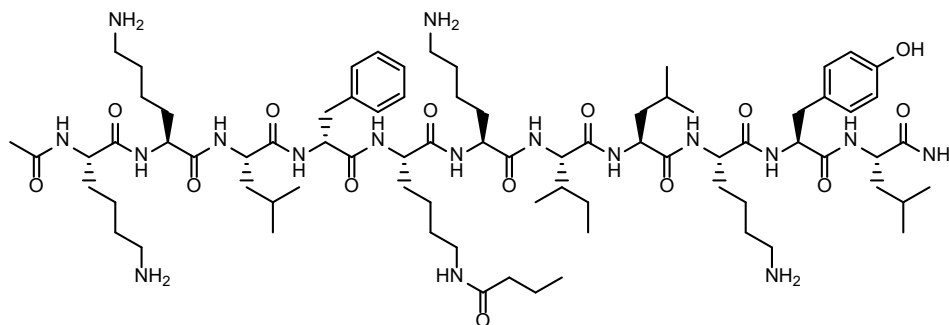

HPLC of crude peptide ( $\lambda=220$  nm)

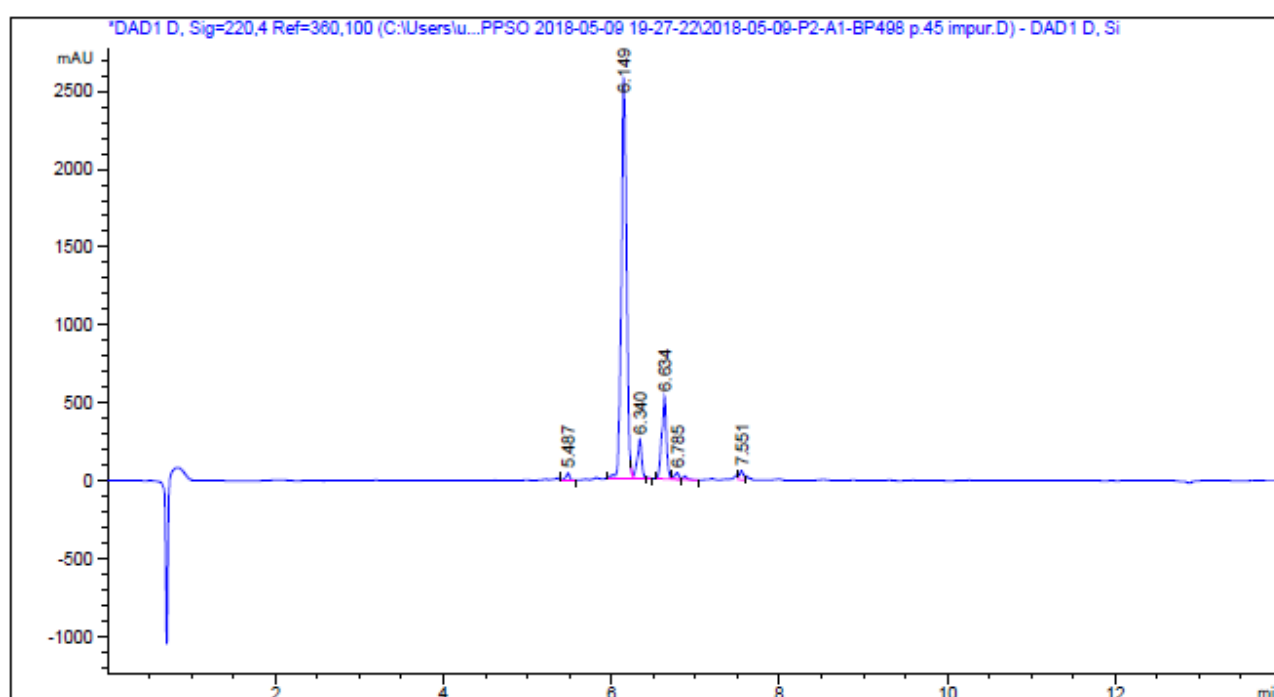

| Peak # | RetTime [min] | Type | Width [min] | Area [mAU*s] | Height [mAU] | Area %  |
|--------|---------------|------|-------------|--------------|--------------|---------|
| 1      | 5.487         | VB R | 0.0464      | 148.45491    | 45.10777     | 1.0160  |
| 2      | 6.149         | VV R | 0.0632      | 1.10937e4    | 2578.84717   | 75.9247 |
| 3      | 6.340         | VV E | 0.0510      | 902.96692    | 250.56866    | 6.1799  |
| 4      | 6.634         | BV R | 0.0567      | 2112.34912   | 528.10651    | 14.4569 |
| 5      | 6.785         | VV E | 0.0489      | 152.63356    | 43.54723     | 1.0446  |
| 6      | 7.551         | VV   | 0.0518      | 201.33051    | 57.53705     | 1.3779  |

Totals : 1.46114e4 3503.71439

# HPLC of purified peptide ( $\lambda=220$ nm)

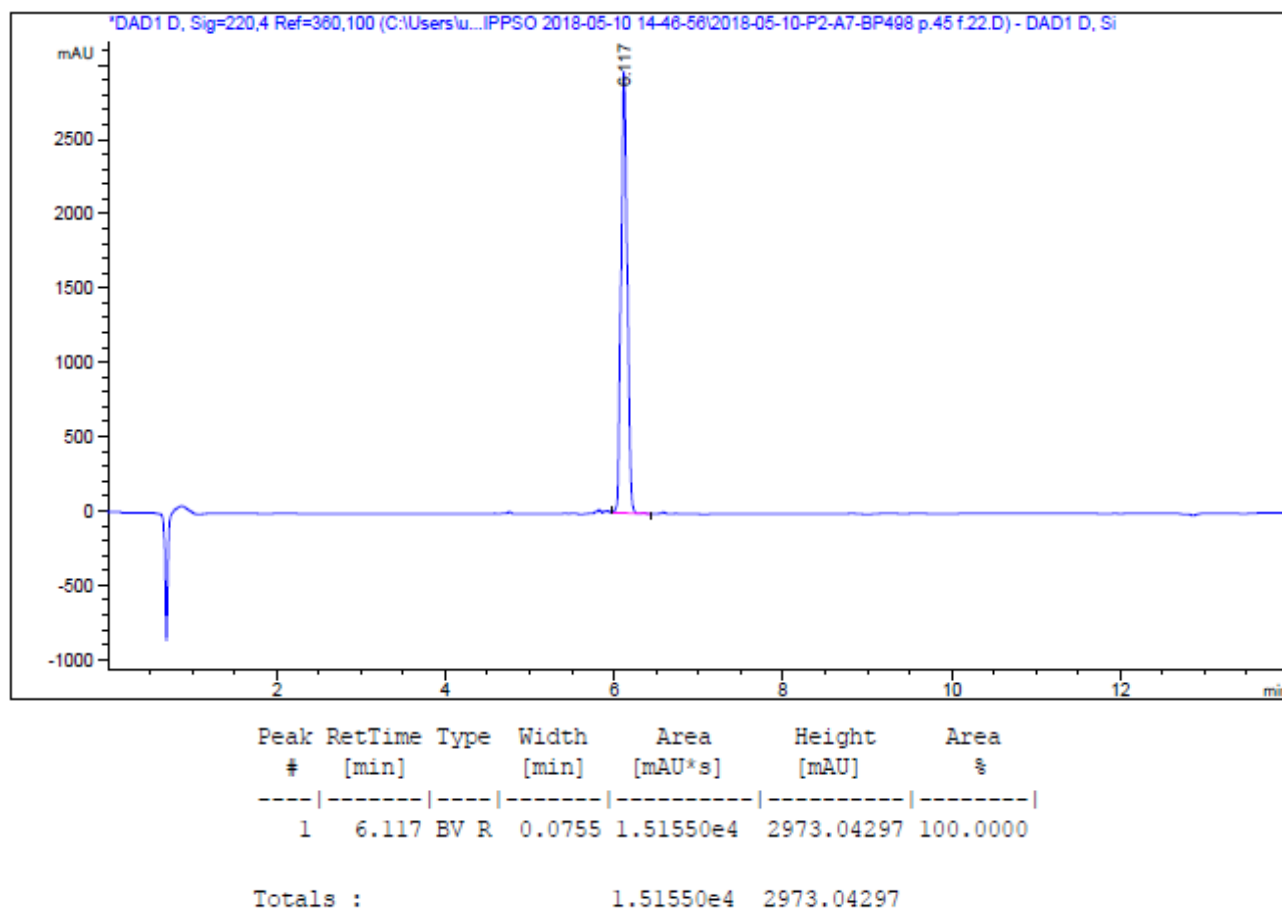

## ESI-MS ( $m/z$ )

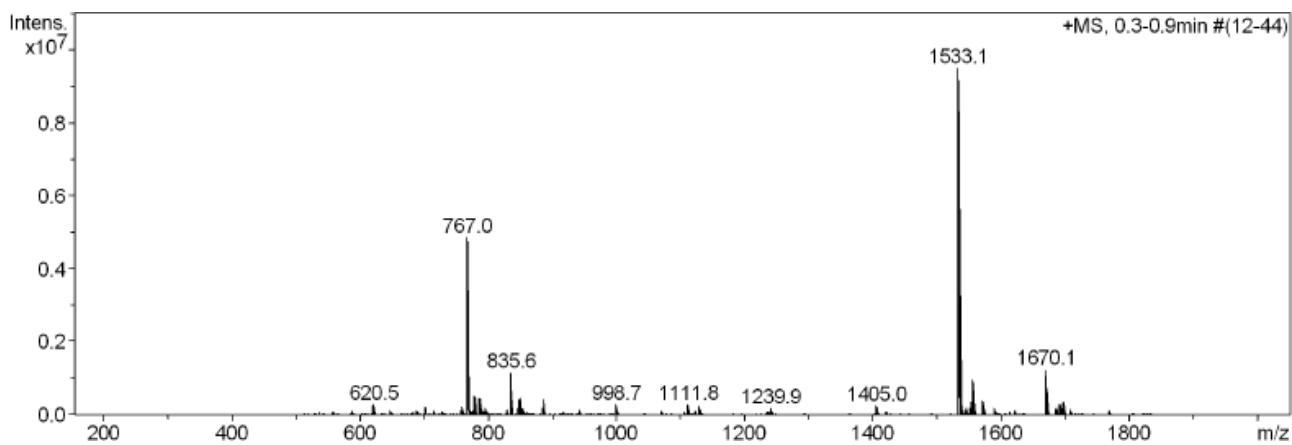



# HRMS ( $m/z$ )

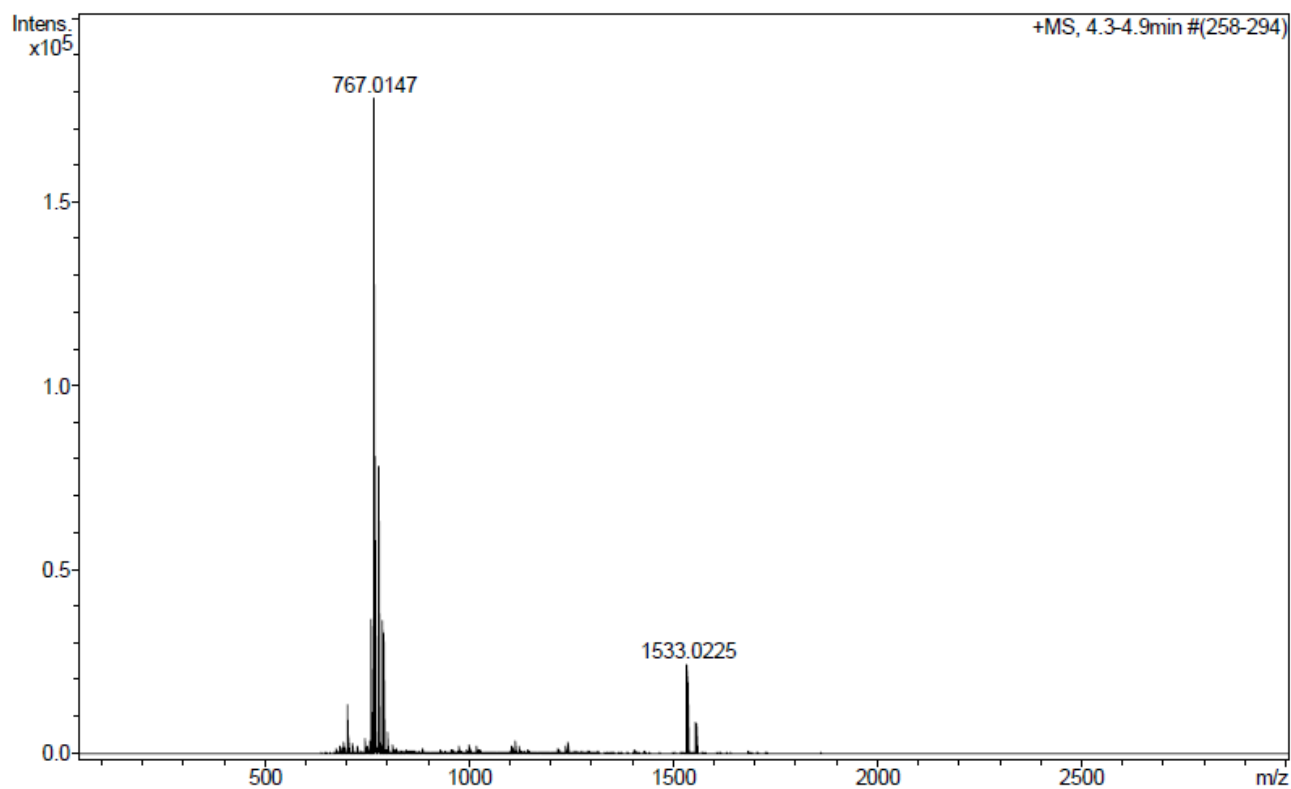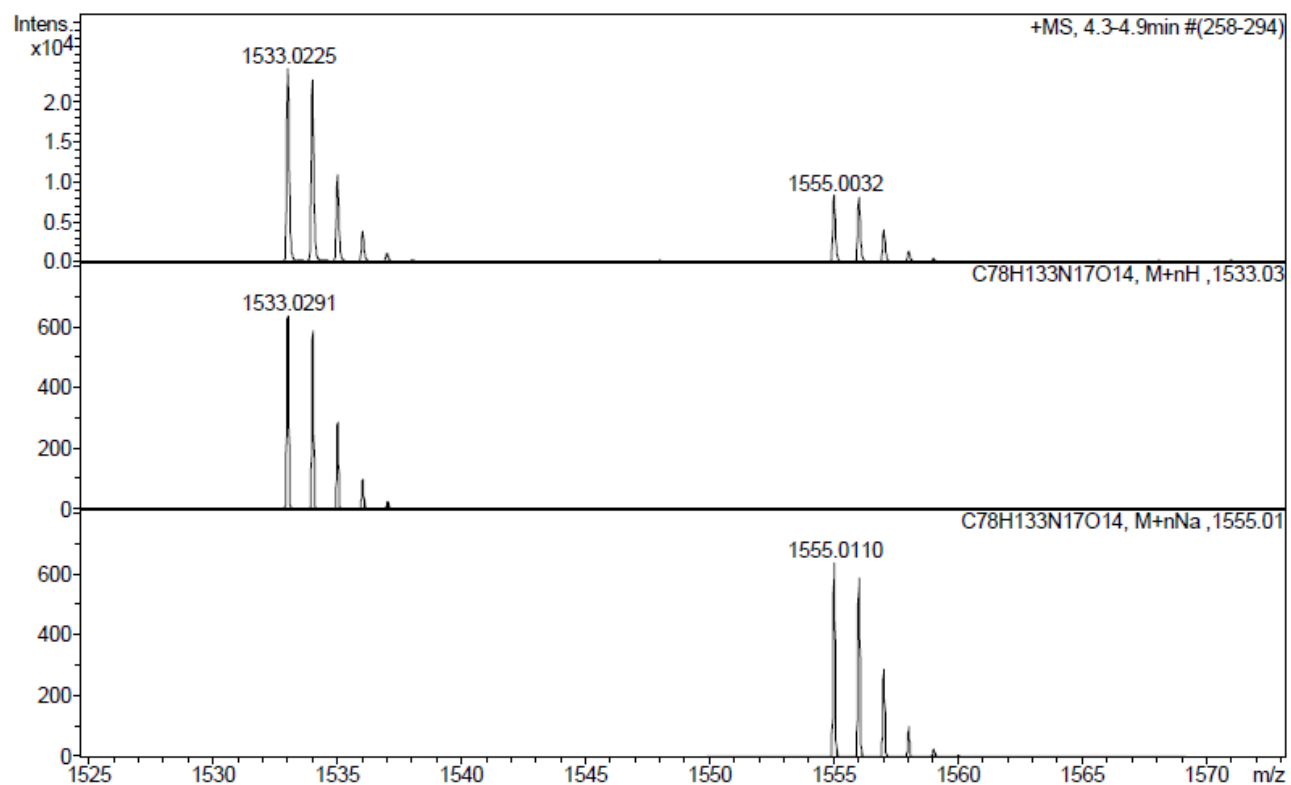

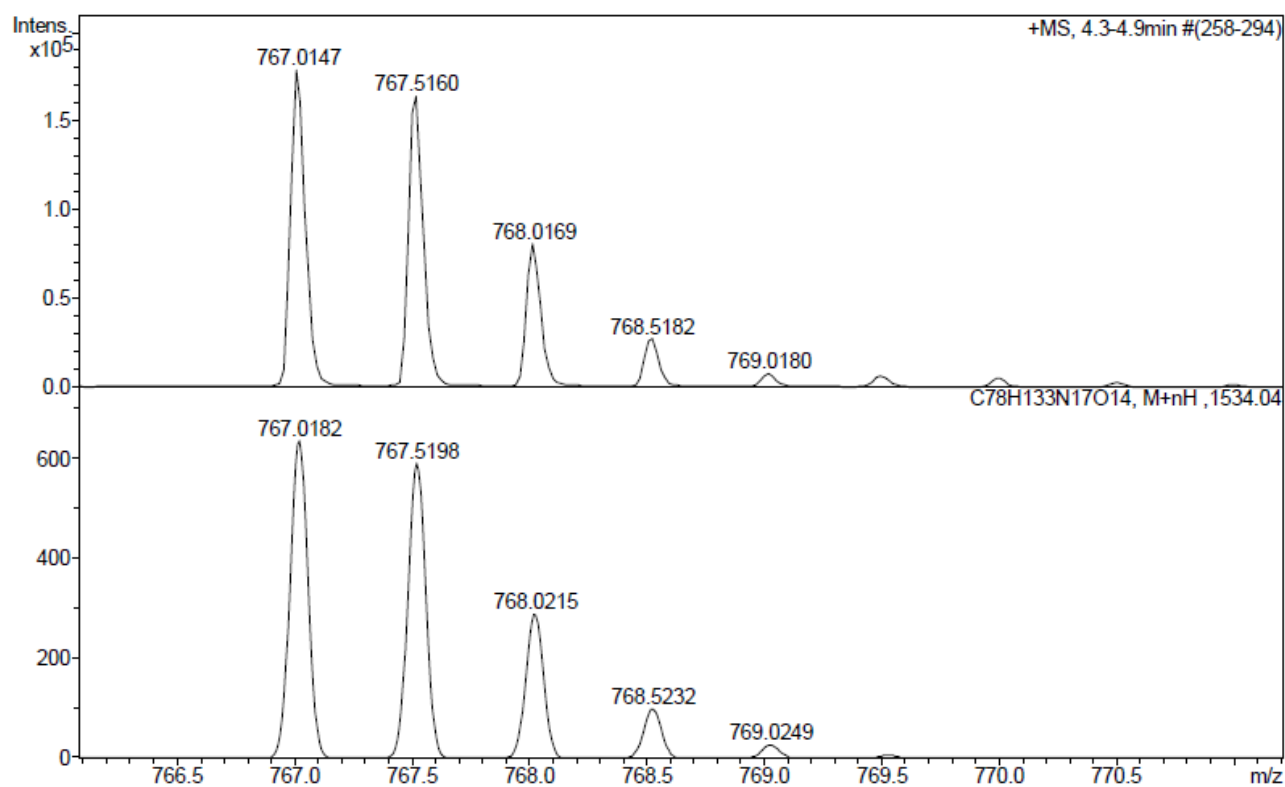

**Ac-Lys-Lys-Leu-D-Phe-Lys-Lys-Ile-Leu-Lys(COC<sub>3</sub>H<sub>7</sub>)-Tyr-Leu-NH<sub>2</sub> (BP499)**

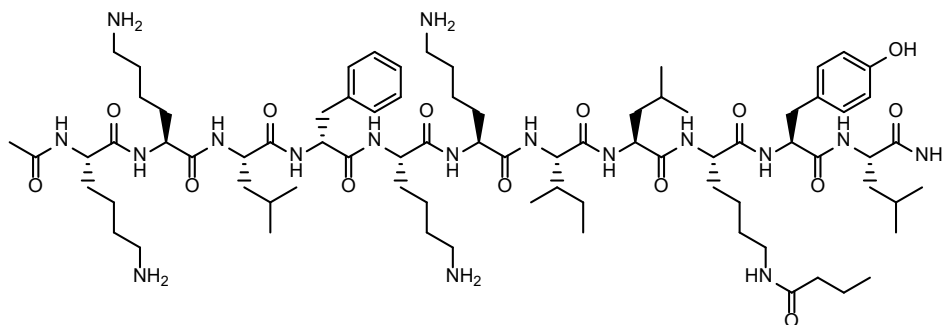

HPLC of crude peptide ( $\lambda=220$  nm)

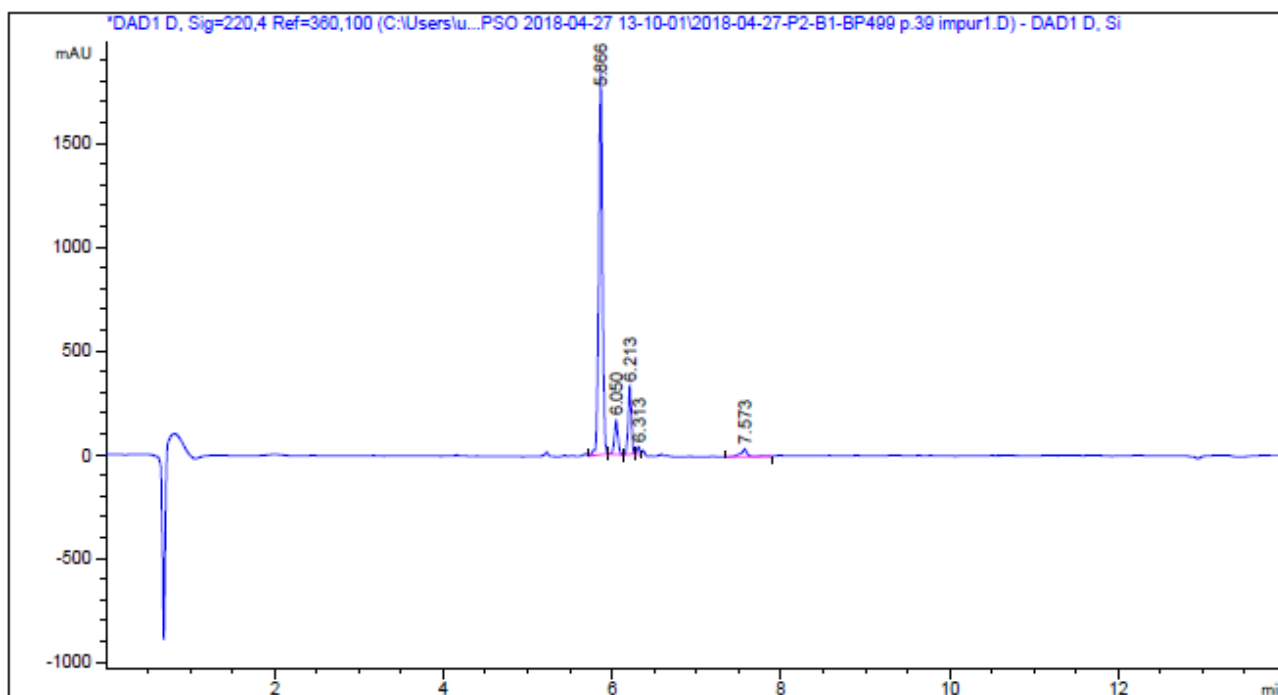

| Peak # | RetTime [min] | Type | Width [min] | Area [mAU*s] | Height [mAU] | Area %  |
|--------|---------------|------|-------------|--------------|--------------|---------|
| 1      | 5.866         | VB R | 0.0443      | 5598.51953   | 1849.33667   | 77.5439 |
| 2      | 6.050         | BB   | 0.0433      | 478.38898    | 162.94824    | 6.6261  |
| 3      | 6.213         | BB   | 0.0390      | 849.00946    | 329.78500    | 11.7594 |
| 4      | 6.313         | BV   | 0.0370      | 90.36411     | 37.69422     | 1.2516  |
| 5      | 7.573         | BV R | 0.0764      | 203.52594    | 36.29560     | 2.8190  |

Totals : 7219.80802 2416.05974

# HPLC of purified peptide ( $\lambda=220$ nm)

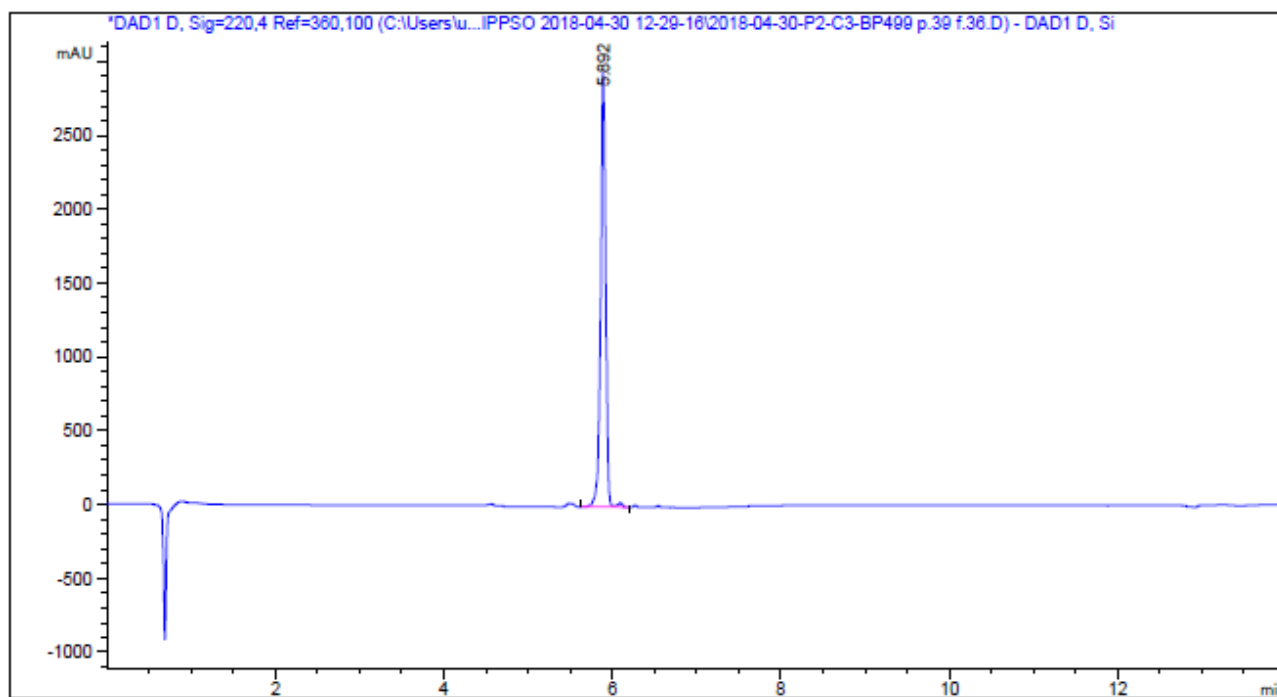

| Peak # | RetTime [min] | Type | Width [min] | Area [mAU*s] | Height [mAU] | Area %   |
|--------|---------------|------|-------------|--------------|--------------|----------|
| 1      | 5.892         | BV R | 0.0617      | 1.23197e4    | 2951.55957   | 100.0000 |

Totals : 1.23197e4 2951.55957

## ESI-MS ( $m/z$ )

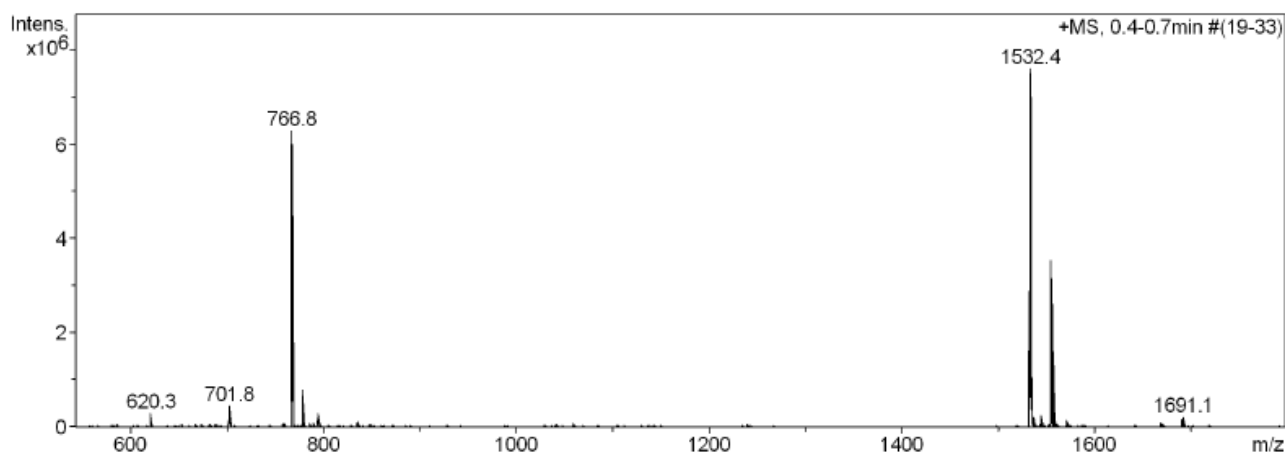

# HRMS (m/z)

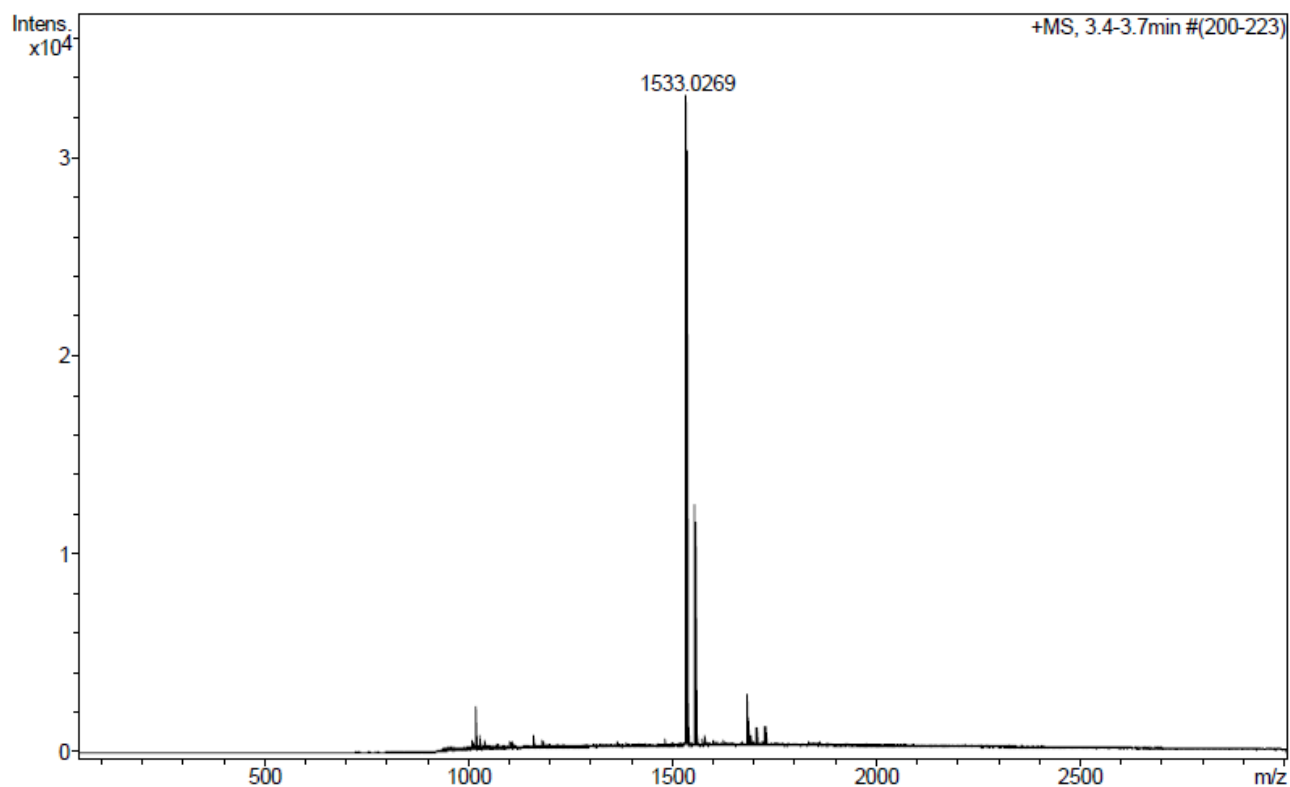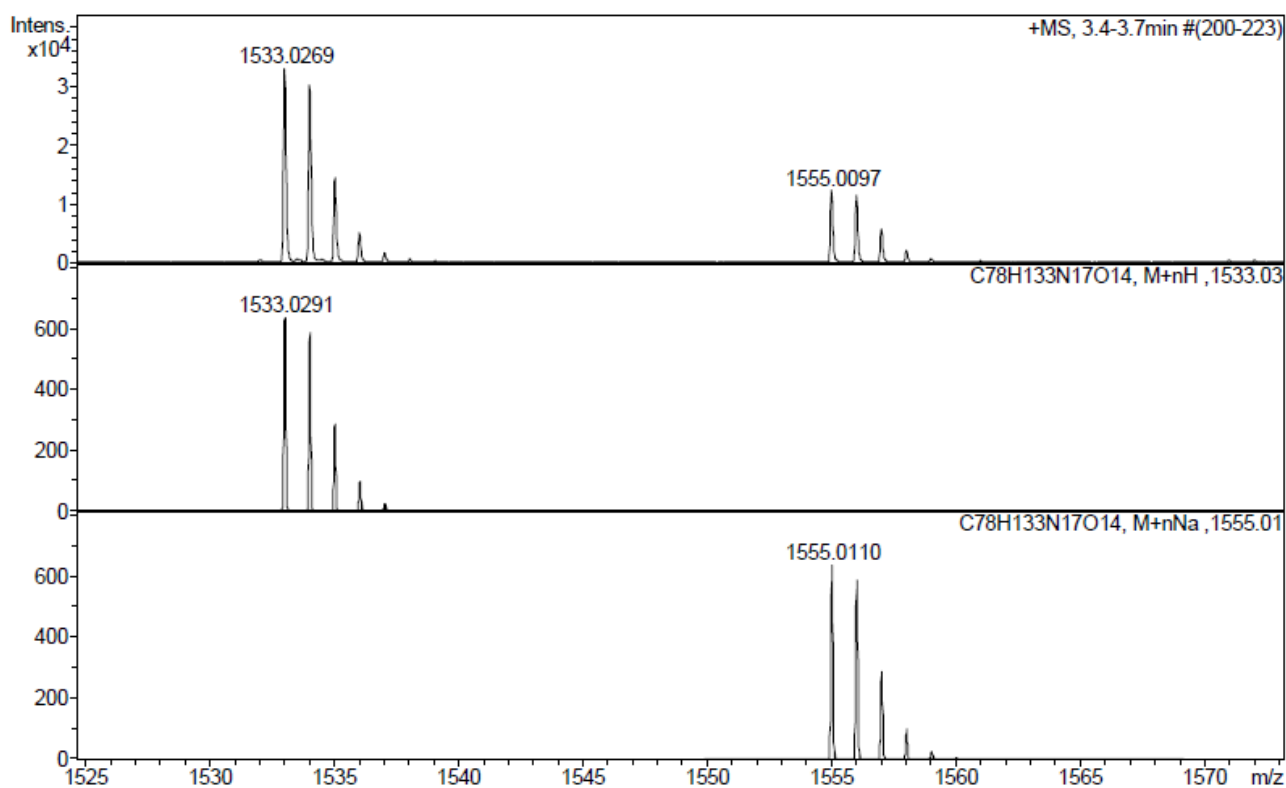

# **Ac-Lys-Lys(COC<sub>11</sub>H<sub>23</sub>)-Leu-D-Phe-Lys-Lys-Ile-Leu-Lys-Tyr-Leu-NH<sub>2</sub> (BP500)**

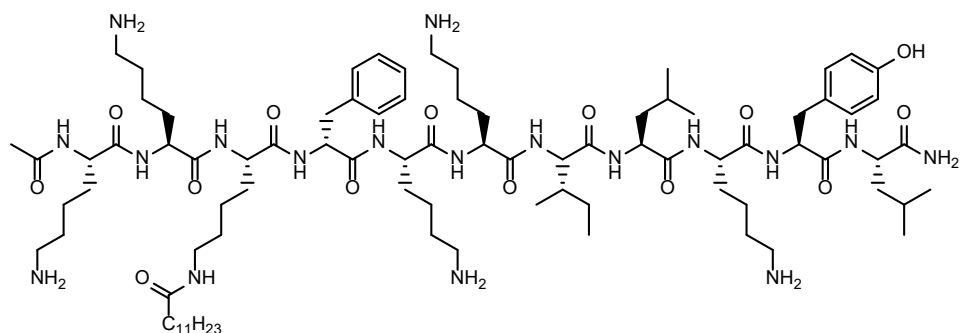

HPLC of crude peptide ( $\lambda=220$  nm)

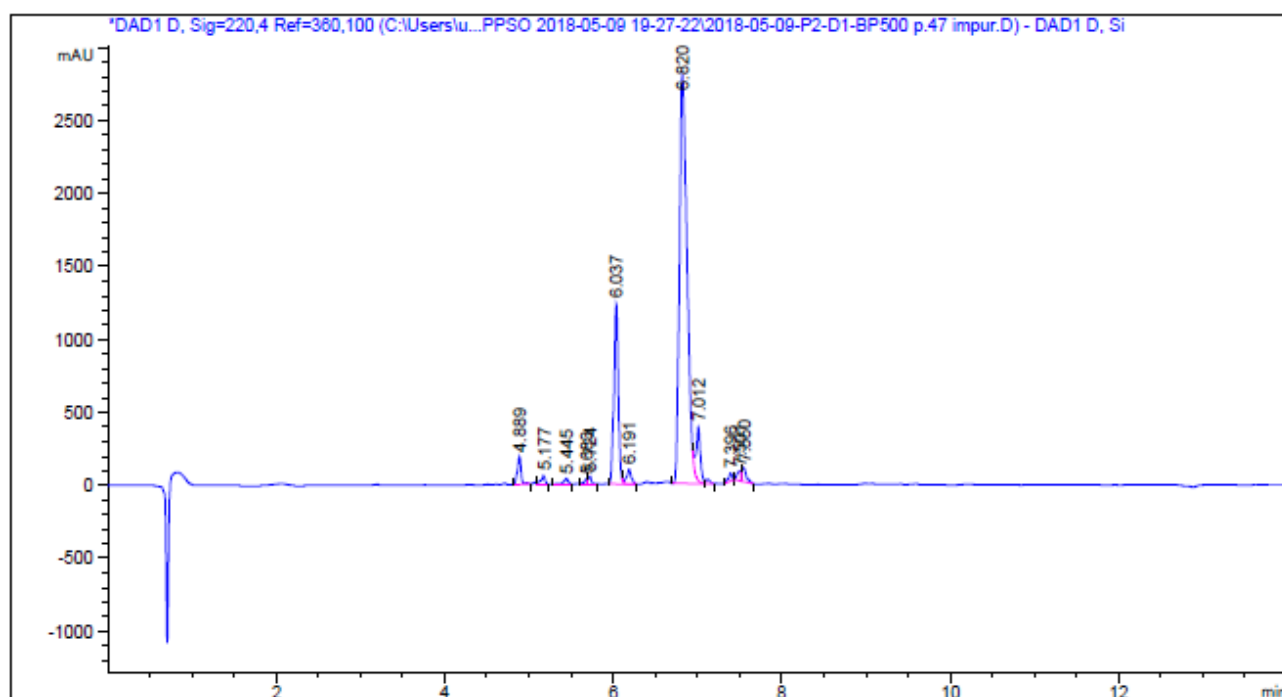

| Peak # | RetTime [min] | Type | Width [min] | Area [mAU*s] | Height [mAU] | Area %  |
|--------|---------------|------|-------------|--------------|--------------|---------|
| 1      | 4.889         | BV R | 0.0428      | 573.98651    | 192.62531    | 2.2259  |
| 2      | 5.177         | VB   | 0.0478      | 194.40025    | 56.93281     | 0.7539  |
| 3      | 5.445         | VB R | 0.0522      | 155.32494    | 41.03360     | 0.6023  |
| 4      | 5.683         | BV   | 0.0402      | 88.94859     | 32.20647     | 0.3449  |
| 5      | 5.724         | VB   | 0.0343      | 124.03711    | 52.92344     | 0.4810  |
| 6      | 6.037         | BV R | 0.0531      | 4459.11426   | 1236.56287   | 17.2920 |
| 7      | 6.191         | VB E | 0.0551      | 397.45981    | 102.88657    | 1.5413  |
| 8      | 6.820         | BV R | 0.0960      | 1.77881e4    | 2804.05859   | 68.9804 |
| 9      | 7.012         | VV E | 0.0503      | 1283.47070   | 371.63638    | 4.9772  |
| 10     | 7.396         | BB   | 0.0442      | 159.22202    | 52.83167     | 0.6174  |
| 11     | 7.501         | BV   | 0.0502      | 202.72284    | 65.27905     | 0.7861  |
| 12     | 7.550         | VB   | 0.0532      | 360.41031    | 97.30477     | 1.3976  |

Totals : 2.57872e4 5106.28153

# HPLC of purified peptide ( $\lambda=220$ nm)

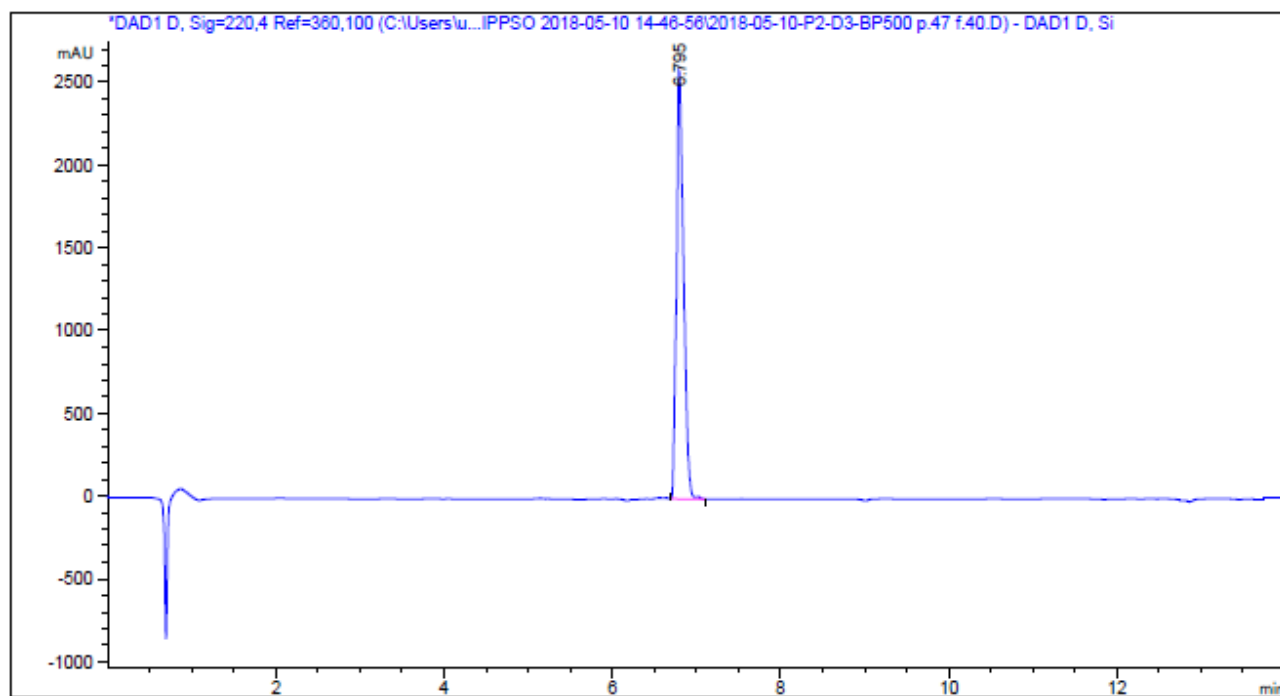

| Peak #   | RetTime [min] | Type | Width [min] | Area [mAU*s] | Height [mAU] | Area %   |
|----------|---------------|------|-------------|--------------|--------------|----------|
| 1        | 6.795         | BV R | 0.0854      | 1.51681e4    | 2586.43701   | 100.0000 |
| Totals : |               |      |             | 1.51681e4    | 2586.43701   |          |

## ESI-MS ( $m/z$ )

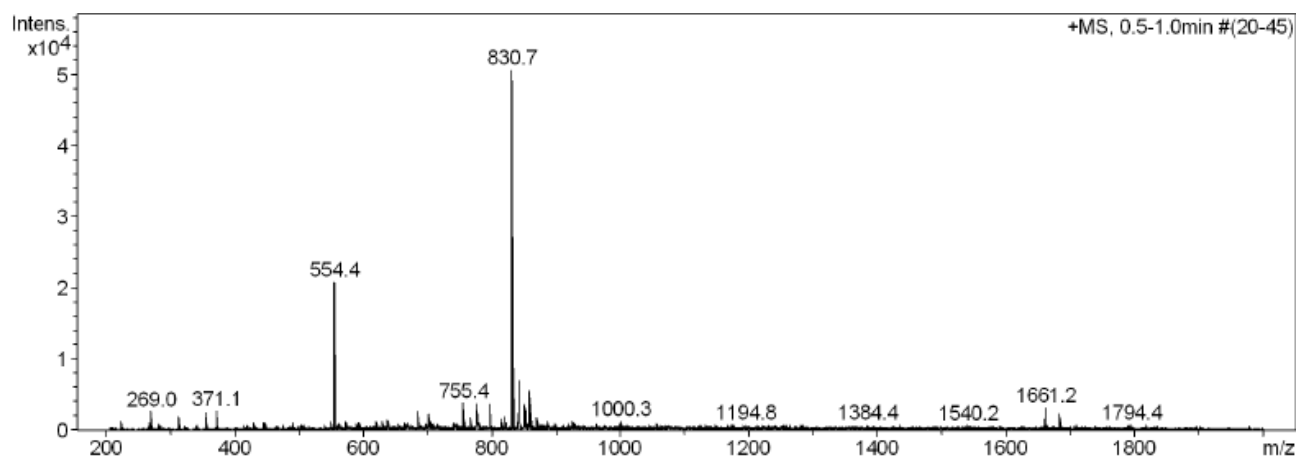

# HRMS ( $m/z$ )

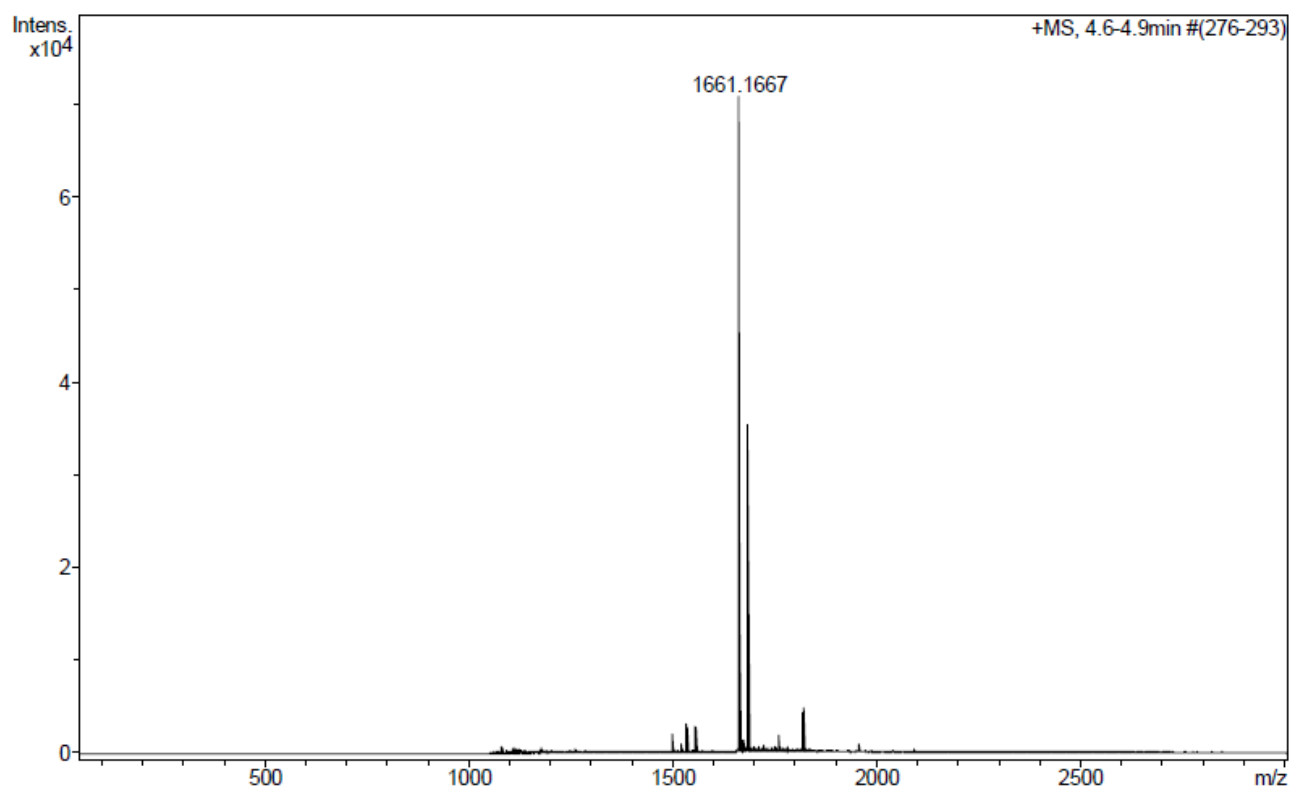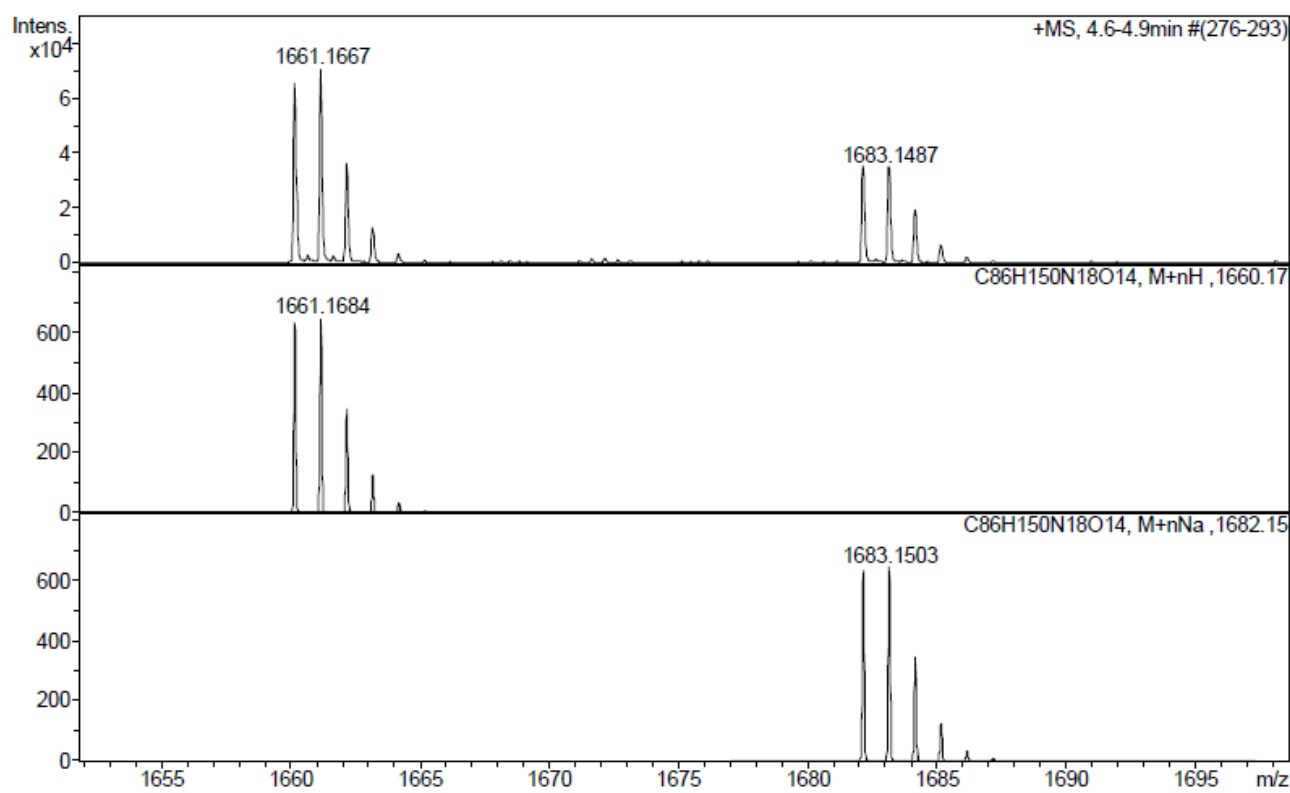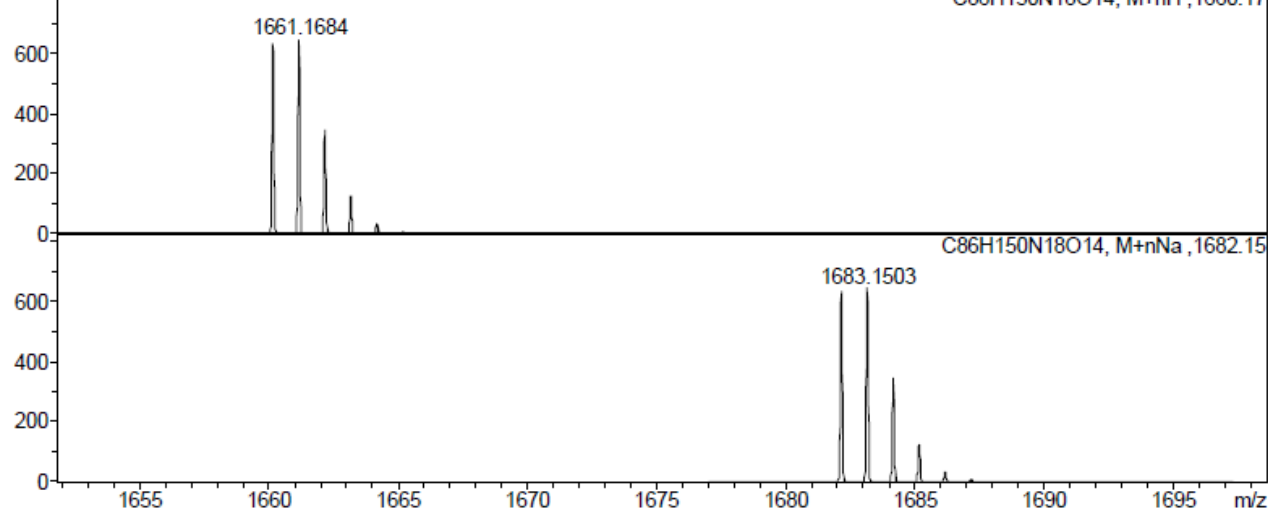



#### 4. NMR experiments of lipopeptides BP389 and BP475

##### BP389

**<sup>1</sup>H-NMR (400 MHz, 20 mM phosphate buffer pH = 6.5 H<sub>2</sub>O/D<sub>2</sub>O (90:10))**  $\delta$  (ppm): 0.77-0.89 (m, 29H, CH<sub>3</sub>-butanoyl,  $\delta$ -CH<sub>3</sub>-Ile, 6  $\times$   $\delta$ -CH<sub>3</sub>-Leu,  $\gamma$ -CH<sub>3</sub>-Ile,  $\delta$ -CH<sub>2</sub>-Lys), 1.22-1.81 (m, 48 H,  $\beta$ -CH<sub>2</sub>-butanoyl,  $\beta$ -CH<sub>2</sub>-Ile,  $\gamma$ -CH<sub>2</sub>-Ile, 3  $\times$   $\beta$ -CH<sub>2</sub>-Leu, 3  $\times$   $\gamma$ -CH-Leu, 6  $\times$   $\beta$ -CH<sub>2</sub>-Lys, 6  $\times$   $\gamma$ -CH<sub>2</sub>-Lys, 5  $\times$   $\delta$ -CH<sub>2</sub>-Lys), 1.97 (s, 3H, CH<sub>3</sub>CO), 2.14 (t,  $J$  = 7.57 Hz, 2H,  $\alpha$ -CH<sub>2</sub>-butanoyl), 2.88-3.02 (m, 12H, 5  $\times$   $\epsilon$ -CH<sub>2</sub>-Lys,  $\beta$ -CH<sub>2</sub>-Phe), 3.09-3.16 (m, 2H,  $\epsilon$ -CH<sub>2</sub>-Lys<sup>10</sup>), 4.03-4.07 (m, 1H,  $\alpha$ -CH-Ile), 4.12-4.33 (m, 5H, 5  $\times$   $\alpha$ -CH-Lys,  $\alpha$ -CH-Lys<sup>10</sup>, 3  $\times$   $\alpha$ -CH-Leu), 4.52-4.55 (m,  $\alpha$ -CH-Phe), 7.09 (s, 1H, CONH<sub>2</sub>), 7.18 (d,  $J$  = 6.96 Hz, 2H, 2  $\times$   $o$ -CH-Phe<sub>arom</sub>), 7.22-7.31 (m, 3H, 2  $\times$   $m$ -CH-Phe<sub>arom</sub>,  $p$ -CH-Phe<sub>arom</sub>), 7.58 (s, 1H, CONH<sub>2</sub>), 8.02 (t,  $J$  = 5.94 Hz, 1H,  $\zeta$ -NH-Lys<sup>10</sup>), 8.16-8.22 (m, 3H,  $\alpha$ -NH-Phe,  $\alpha$ -NH-Leu,  $\alpha$ -NH-Lys), 8.29-8.36 (m, 6H, 4  $\times$   $\alpha$ -NH-Lys,  $\alpha$ -NH-Ile,  $\alpha$ -NH-Leu), 8.40-8.42 (m, 2H,  $\alpha$ -NH-Lys<sup>10</sup>,  $\alpha$ -NH-Leu).

**<sup>1</sup>H-NMR (400 MHz, 20 mM phosphate buffer at pH = 6.5 with H<sub>2</sub>O/D<sub>2</sub>O (90:10) containing 30% CF<sub>3</sub>CD<sub>2</sub>OD)**  $\delta$  (ppm): 0.69-0.72 (m, 6H, 2  $\times$   $\delta$ -CH<sub>3</sub>-Leu<sup>8</sup>), 0.77-0.92 (m, 18H, 2  $\times$   $\delta$ -CH<sub>3</sub>-Leu<sup>11</sup>,  $\delta$ -CH<sub>3</sub>-Ile<sup>7</sup>,  $\delta$ -CH<sub>3</sub>-Leu<sup>3</sup>, CH<sub>3</sub>-butanoyl,  $\delta$ <sup>1</sup>-CH<sub>3</sub>-Leu<sup>3</sup>), 1.03-1.11 (m, 3H,  $\gamma$ -CH<sub>3</sub>-Ile<sup>7</sup>), 1.35-1.98 (m, 48H,  $\gamma$ -CH-Leu<sup>8</sup>,  $\delta$ -CH<sub>2</sub>-Lys<sup>1</sup>,  $\delta$ -CH<sub>2</sub>-Lys<sup>2</sup>,  $\delta$ -CH<sub>2</sub>-Lys<sup>5</sup>,  $\delta$ -CH<sub>2</sub>-Lys<sup>6</sup>,  $\delta$ -CH<sub>2</sub>-Lys<sup>9</sup>,  $\delta$ -CH<sub>2</sub>-Lys<sup>10</sup>,  $\gamma$ -CH-Leu<sup>11</sup>,  $\beta$ -CH<sub>2</sub>-butanoyl,  $\gamma$ -CH-Leu<sup>3</sup>,  $\gamma$ -CH<sub>2</sub>-Lys<sup>1</sup>,  $\gamma$ -CH<sub>2</sub>-Lys<sup>2</sup>,  $\gamma$ -CH<sub>2</sub>-Lys<sup>5</sup>,  $\gamma$ -CH<sub>2</sub>-Lys<sup>6</sup>,  $\gamma$ -CH<sub>2</sub>-Lys<sup>9</sup>,  $\gamma$ -CH<sub>2</sub>-Lys<sup>10</sup>,  $\beta$ -CH-Leu<sup>8</sup>,  $\gamma$ -CH<sub>2</sub>-Ile<sup>7</sup>,  $\beta$ -CH-Leu<sup>3</sup>,  $\beta$ -CH<sub>2</sub>-Lys<sup>1</sup>,  $\beta$ -CH<sub>2</sub>-Lys<sup>2</sup>,  $\beta$ -CH<sub>2</sub>-Lys<sup>5</sup>,  $\beta$ -CH<sub>2</sub>-Lys<sup>6</sup>,  $\beta$ -CH<sub>2</sub>-Lys<sup>9</sup>,  $\beta$ -CH<sub>2</sub>-Lys<sup>10</sup>,  $\beta$ -CH<sub>2</sub>-Leu<sup>11</sup>,  $\beta$ -CH-Ile<sup>7</sup>), 2.03 (s, 3H, CH<sub>3</sub>CO), 2.13 (t,  $J$  = 7.48 Hz, 2H,  $\alpha$ -CH<sub>2</sub>-butanoyl), 2.91-3.00 (m, 10 H,  $\epsilon$ -CH<sub>2</sub>-Lys<sup>1</sup>,  $\epsilon$ -CH<sub>2</sub>-Lys<sup>2</sup>,  $\epsilon$ -CH<sub>2</sub>-Lys<sup>5</sup>,  $\epsilon$ -CH<sub>2</sub>-Lys<sup>6</sup>,  $\epsilon$ -CH<sub>2</sub>-Lys<sup>9</sup>), 3.08-3.16 (m, 4 H,  $\epsilon$ -CH<sub>2</sub>-Lys<sup>10</sup>,  $\beta$ -CH<sub>2</sub>-Phe<sup>4</sup>), 3.59 (br, 1H,  $\alpha$ -CH-Ile<sup>7</sup>), 3.84-4.24 (m, 10H,  $\alpha$ -CH-Lys<sup>5</sup>,  $\alpha$ -CH-Leu<sup>8</sup>,  $\alpha$ -CH-Lys<sup>6</sup>,  $\alpha$ -CH-Lys<sup>1</sup>,  $\alpha$ -CH-Lys<sup>2</sup>,  $\alpha$ -CH-Lys<sup>9</sup>,  $\alpha$ -CH-Lys<sup>10</sup>,  $\alpha$ -CH-Leu<sup>11</sup>,  $\alpha$ -CH-Leu<sup>3</sup>,  $\alpha$ -CH-Phe<sup>4</sup>), 6.96 (s, 1H, CONH<sub>2</sub>), 7.10 (d,  $J$  = 7.01 Hz, 2H, 2  $\times$   $o$ -CH-Phe<sub>arom</sub>), 7.16-7.21 (m, 4 H,  $p$ -CH-Phe<sub>arom</sub>, 2  $\times$   $m$ -CH-Phe<sub>arom</sub>, CONH<sub>2</sub>), 7.57 (br, 1H,  $\alpha$ -NH-Leu<sup>3</sup>), 7.59 (br, 1H,  $\alpha$ -NH-Lys<sup>6</sup>), 7.73 (br, 1H,  $\alpha$ -NH-Lys<sup>9</sup>), 7.83 (br, 1H,  $\alpha$ -NH-Lys<sup>10</sup>), 8.07-8.10 (m, 3H,  $\alpha$ -NH-Leu<sup>11</sup>,  $\alpha$ -NH-Ile<sup>7</sup>,  $\alpha$ -NH-Phe<sup>4</sup>), 8.13 (br, 1H,  $\alpha$ -NH-Lys<sup>5</sup>), 8.26 (br, 1H,  $\alpha$ -NH-Leu<sup>8</sup>), 8.36 (br, 1H,  $\alpha$ -NH-Lys<sup>1</sup>), 8.42 (br, 1H,  $\alpha$ -NH-Lys<sup>2</sup>).

## BP475

**<sup>1</sup>H-NMR (400 MHz, 20 mM phosphate buffer pH = 6.5 H<sub>2</sub>O/D<sub>2</sub>O (90:10))**  $\delta$  (ppm): 0.75-0.90 (m, 24H, CH<sub>3</sub>-butanoyl,  $\delta$ -CH<sub>3</sub>-Ile, 6  $\times$   $\delta$ -CH<sub>3</sub>-Leu), 0.99-1.16 (m, 5H,  $\gamma$ -CH<sub>3</sub>-Ile,  $\delta$ -CH<sub>2</sub>-Lys), 1.25-1.82 (m, 48 H,  $\beta$ -CH<sub>2</sub>-butanoyl,  $\beta$ -CH<sub>2</sub>-Ile,  $\gamma$ -CH<sub>2</sub>-Ile, 3  $\times$   $\beta$ -CH<sub>2</sub>-Leu, 3  $\times$   $\gamma$ -CH-Leu, 6  $\times$   $\beta$ -CH<sub>2</sub>-Lys, 6  $\times$   $\gamma$ -CH<sub>2</sub>-Lys, 5  $\times$   $\delta$ -CH<sub>2</sub>-Lys), 1.98 (s, 3H, CH<sub>3</sub>CO), 2.15 (t,  $J$  = 7.48 Hz, 2H,  $\alpha$ -CH<sub>2</sub>-butanoyl), 2.85-3.00 (m, 11H, 5  $\times$   $\epsilon$ -CH<sub>2</sub>-Lys,  $\beta$ -CH<sub>2</sub>-Phe), 3.06-3.16 (m, 3H,  $\epsilon$ -CH<sub>2</sub>-Lys<sup>10</sup>,  $\beta$ -CH<sub>2</sub>-Phe), 4.06-4.13 (m, 2H,  $\alpha$ -CH-Ile,  $\alpha$ -CH-Lys), 4.15-4.34 (m, 5H, 4  $\times$   $\alpha$ -CH-Lys,  $\alpha$ -CH-Lys<sup>10</sup>, 3  $\times$   $\alpha$ -CH-Leu), 4.54-4.57 (m,  $\alpha$ -CH-Phe), 7.11 (s, 1H, CONH<sub>2</sub>), 7.21 (d,  $J$  = 7.16 Hz, 2H, 2  $\times$  *o*-CH-Phe<sub>arom</sub>), 7.26-7.36 (m, 3H, 2  $\times$  *m*-CH-Phe<sub>arom</sub>, *p*-CH-Phe<sub>arom</sub>), 7.59 (s, 1H, CONH<sub>2</sub>), 8.04 (t,  $J$  = 5.82Hz, 1H,  $\zeta$ -NH-Lys<sup>10</sup>), 8.21-8.29 (m, 3H,  $\alpha$ -NH-Ile,  $\alpha$ -NH-Leu,  $\alpha$ -NH-Lys), 8.32-8.46 (m, 6H,  $\alpha$ -NH-Lys<sup>10</sup>, 4  $\times$   $\alpha$ -NH-Lys,  $\alpha$ -NH-Phe, 2  $\times$   $\alpha$ -NH-Leu).

**<sup>1</sup>H-NMR (400 MHz, 20 mM phosphate buffer at pH = 6.5 with H<sub>2</sub>O/D<sub>2</sub>O (90:10) containing 30% CF<sub>3</sub>CD<sub>2</sub>OD))**  $\delta$  (ppm): 0.82-0.94 (m, 24H, CH<sub>3</sub>-butanoyl, 2  $\times$   $\delta$ -CH<sub>3</sub>-Leu<sup>3</sup>, 2  $\times$   $\delta$ -CH<sub>3</sub>-Leu<sup>8</sup>, 2  $\times$   $\delta$ -CH<sub>3</sub>-Leu<sup>11</sup>,  $\delta$ -CH<sub>3</sub>-Ile), 1.08-1.31 (m, 3H,  $\gamma$ -CH<sub>3</sub>-Ile), 1.33-1.85 (m, 24H,  $\beta$ -CH<sub>2</sub>-butanoyl,  $\beta$ -CH<sub>2</sub>-Lys<sup>6</sup>,  $\beta$ -CH<sub>2</sub>-Leu<sup>8</sup>,  $\beta$ -CH<sub>2</sub>-Leu<sup>11</sup>,  $\delta$ -CH<sub>2</sub>-Lys<sup>1</sup>,  $\delta$ -CH<sub>2</sub>-Lys<sup>2</sup>,  $\delta$ -CH<sub>2</sub>-Lys<sup>6</sup>,  $\delta$ -CH<sub>2</sub>-Lys<sup>10</sup>,  $\gamma$ -CH<sub>2</sub>-Lys<sup>1</sup>,  $\gamma$ -CH<sub>2</sub>-Lys<sup>2</sup>,  $\gamma$ -CH<sub>2</sub>-Lys<sup>6</sup>,  $\gamma$ -CH<sub>2</sub>-Ile), 1.95 (s, 7H,  $\beta$ -CH<sub>2</sub>-Lys<sup>2</sup>,  $\beta$ -CH<sub>2</sub>-Lys<sup>10</sup>, CH<sub>3</sub>CO), 2.14 (t,  $J$  = 7.66 Hz, 2H,  $\alpha$ -CH<sub>2</sub>-butanoyl), 2.90-2.99 (m, 7 H,  $\epsilon$ -CH<sub>2</sub>-Lys<sup>1</sup>,  $\epsilon$ -CH<sub>2</sub>-Lys<sup>2</sup>,  $\epsilon$ -CH<sub>2</sub>-Lys<sup>6</sup>,  $\beta$ -CH<sub>2</sub>-Phe), 3.15 (m, 3H,  $\epsilon$ -CH<sub>2</sub>-Lys<sup>10</sup>,  $\beta$ -CH<sub>2</sub>-Phe), 3.77 (br, 1H,  $\alpha$ -CH-Ile), 3.85-4.19 (m, 8 H,  $\alpha$ -CH-Lys<sup>1</sup>,  $\alpha$ -CH-Lys<sup>2</sup>,  $\alpha$ -CH-Lys<sup>6</sup>,  $\alpha$ -CH-Lys<sup>10</sup>,  $\alpha$ -CH-Leu<sup>3</sup>,  $\alpha$ -CH-Leu<sup>8</sup>,  $\alpha$ -CH-Leu<sup>11</sup>,  $\alpha$ -CH-Phe), 6.94 (s, 1H, CONH<sub>2</sub>), 7.08 (d,  $J$  = 6.36 Hz, 2H, 2  $\times$  *o*-CH-Phe<sub>arom</sub>), 7.27-7.18 (m, 4 H, *p*-CH-Phe<sub>arom</sub>, 2  $\times$  *m*-CH-Phe<sub>arom</sub>, CONH<sub>2</sub>), 7.46-7.43 (m, 1H,  $\zeta$ -NH-Lys<sup>10</sup>), 7.64 (br, 1H,  $\alpha$ -NH-Leu<sup>3</sup>), 7.76 (br, 1H,  $\alpha$ -NH-Lys<sup>10</sup>), 7.81 (br, 1H,  $\alpha$ -NH-Lys<sup>6</sup>), 7.92 (br, 1H,  $\alpha$ -NH-Lys<sup>9</sup>), 8.03-8.11 (m, 3H,  $\alpha$ -NH-Lys<sup>5</sup>,  $\alpha$ -NH-Ile,  $\alpha$ -NH-Leu<sup>11</sup>), 8.15-8.19 (m, 2H,  $\alpha$ -NH-Phe,  $\alpha$ -NH-Leu<sup>8</sup>), 8.22 (br, 1H,  $\alpha$ -NH-Lys<sup>1</sup>), 8.30 (br, 1H,  $\alpha$ -NH-Lys<sup>2</sup>).

**BP389****Table S4. NMR data of lipopeptide BP389 recorded at 400 MHz in 20 mM phosphate buffer, pH = 6.5 H<sub>2</sub>O/D<sub>2</sub>O (90:10)**

| Amino acid              | $\delta$ (ppm) |       |              |              |             |             |
|-------------------------|----------------|-------|--------------|--------------|-------------|-------------|
|                         | CO-NH          | CO-NH | $\alpha$ -CH | $\alpha$ -CH | $\beta$ -CH | $\beta$ -CH |
| <b>Phe<sup>4</sup></b>  | 8.32           | 123.8 | 4.53         | 54.8         | 2.97 / 3.01 | 36.9        |
| <b>Ile<sup>7</sup></b>  | 8.34           | 124.1 | 4.06         | 57.9         | 1.78        | 35.7        |
| <b>Lys<sup>10</sup></b> | 8.41           | 122.5 | 4.21         | 53.2         | 1.66        | 38.9        |
| <b>5 × Lys</b>          | 8.30           | 123.0 | 4.19         | 53.1         | 1.61        | 30.5        |
|                         | 8.32           | 127.0 | 4.24         | 53.3         | 1.70        | 30.3        |
|                         | 8.32           | 121.9 | 4.18         | 53.5         | 1.67        | 30.2        |
|                         | 8.35           | 123.7 | 4.13         | 53.8         | 1.65        | 30.2        |
|                         | 8.17           | 124.0 | 4.20         | 53.6         | 1.46        | 30.3        |
|                         | 8.21           | 123.6 | 4.26         | 51.8         | 1.51        | 39.6        |
| <b>3 × Leu</b>          | 8.34           | 124.1 | 4.29         | 52.0         | 1.54        | 39.6        |
|                         | 8.42           | 127.8 | 4.33         | 52.1         | 1.61        | 39.5        |

**Table S5. NMR data of lipopeptide BP389 recorded at 400 MHz in 20 mM phosphate buffer, pH = 6.5 H<sub>2</sub>O/D<sub>2</sub>O (90:10), containing 30% CF<sub>3</sub>CD<sub>2</sub>OD**

| Amino acid              | $\delta$ (ppm) |       |              |              |             |             |
|-------------------------|----------------|-------|--------------|--------------|-------------|-------------|
|                         | CO-NH          | CO-NH | $\alpha$ -CH | $\alpha$ -CH | $\beta$ -CH | $\beta$ -CH |
| <b>Lys<sup>1</sup></b>  | 8.36           | 126.1 | 4.00         | 56.6         | 1.82        | 29.4        |
| <b>Lys<sup>2</sup></b>  | 8.42           | 116.8 | 4.02         | 56.5         | 1.82        | 29.7        |
| <b>Leu<sup>3</sup></b>  | 7.57           | 124.6 | 4.15         | 54.3         | 1.73        | 26.6        |
| <b>Phe<sup>4</sup></b>  | 8.10           | 118.2 | 4.24         | 57.8         | 3.10        | 35.7        |
| <b>Lys<sup>5</sup></b>  | 8.13           | 116.0 | 3.84         | 57.0         | 1.88        | 29.4        |
| <b>Lys<sup>6</sup></b>  | 7.59           | 118.7 | 3.99         | 56.8         | 2.01        | 29.5        |
| <b>Ile<sup>7</sup></b>  | 8.10           | 120.2 | 3.59         | 62.2         | 1.92        | 34.8        |
| <b>Leu<sup>8</sup></b>  | 8.26           | 118.7 | 3.88         | 55.1         | 1.66        | 26.5        |
| <b>Lys<sup>9</sup></b>  | 7.73           | 117.9 | 4.02         | 55.7         | 1.95        | 29.2        |
| <b>Lys<sup>10</sup></b> | 7.83           | 119.5 | 4.04         | 55.9         | 1.90        | 28.0        |
| <b>Leu<sup>11</sup></b> | 8.07           | 118.4 | 4.12         | 53.0         | 1.79        |             |

## BP475

**Table S6. NMR data of lipopeptide BP475 recorded at 400 MHz in 20 mM phosphate buffer, pH = 6.5 H<sub>2</sub>O/D<sub>2</sub>O (90:10)**

| Amino acid              | $\delta$ (ppm) |       |              |              |             |             |
|-------------------------|----------------|-------|--------------|--------------|-------------|-------------|
|                         | CO-NH          | CO-NH | $\alpha$ -CH | $\alpha$ -CH | $\beta$ -CH | $\beta$ -CH |
| <b>Phe<sup>4</sup></b>  | 8.40           | 122.0 | 4.56         | 55.3         | 3.08 / 2.98 | 36.8        |
| <b>Ile<sup>7</sup></b>  | 8.26           | 122.3 | 4.08         | 57.9         | 1.79        | 35.6        |
| <b>Lys<sup>10</sup></b> | 8.32           | 122.9 | 4.24         | 53.4         | 1.72        | 30.3        |
| <b>5 × Lys</b>          | 8.27           | 122.7 | 4.22         | 53.5         | 1.68        | 30.2        |
|                         | 8.34           | 124.0 | 4.17         | 53.8         | 1.72        | 30.3        |
|                         | 8.38           | 124.2 | 4.10         | 53.4         | 1.49        | 30.1        |
|                         | 8.39           | 122.7 | 4.22         | 53.6         | 1.72        | 38.3        |
|                         | 8.45           | 122.3 | 4.29         | 53.2         | 1.68        | 30.1        |
|                         | 8.22           | 123.5 | 4.25         | 52.2         | 1.39        | 39.8        |
| <b>3 × Leu</b>          | 8.34           | 121.0 | 4.27         | 52.0         | 1.62        | 39.6        |
|                         | 8.42           | 127.8 | 4.33         | 52.1         | 1.54        | 39.5        |

**Table S7. NMR data of lipopeptide BP475 recorded at 400 MHz in 20 mM phosphate buffer, pH = 6.5 H<sub>2</sub>O/D<sub>2</sub>O (90:10), containing 30% CF<sub>3</sub>CD<sub>2</sub>OD**

| Amino acid              | $\delta$ (ppm) |       |              |              |             |             |
|-------------------------|----------------|-------|--------------|--------------|-------------|-------------|
|                         | CO-NH          | CO-NH | $\alpha$ -CH | $\alpha$ -CH | $\beta$ -CH | $\beta$ -CH |
| <b>Lys<sup>1</sup></b>  | 8.22           | 125.7 | 3.89         | 55.8         |             |             |
| <b>Lys<sup>2</sup></b>  | 8.30           | 117.5 | 4.10         | 55.5         | 1.94        | 29.3        |
| <b>Leu<sup>3</sup></b>  | 7.64           | 112.0 | 4.13         | 54.2         |             |             |
| <b>Phe<sup>4</sup></b>  | 8.16           | 116.0 | 4.04         | 55.5         | 2.99 / 3.15 | 38.9        |
| <b>Lys<sup>5</sup></b>  | 8.07           | 119.4 | 4.03         | 55.1         |             |             |
| <b>Lys<sup>6</sup></b>  | 7.81           | 118.8 | 4.01         | 56.6         | 1.78        | 29.2        |
| <b>Ile<sup>7</sup></b>  | 8.09           | 118.7 | 3.77         | 61.4         | 2.08        | 34.6        |
| <b>Leu<sup>8</sup></b>  | 8.18           | 119.0 | 4.01         | 56.6         | 1.71        |             |
| <b>Lys<sup>9</sup></b>  | 7.92           | 117.8 | 4.06         | 55.55        |             |             |
| <b>Lys<sup>10</sup></b> | 7.76           | 119.4 | 4.08         | 55.9         | 1.95        | 30.1        |
| <b>Leu<sup>11</sup></b> | 8.04           | 118.4 | 4.17         | 53.0         | 1.83        |             |

BP389

400 MHz. 20 mM phosphate buffer. pH = 6.5 H<sub>2</sub>O/D<sub>2</sub>O (90:10)

<sup>1</sup>H-NMR

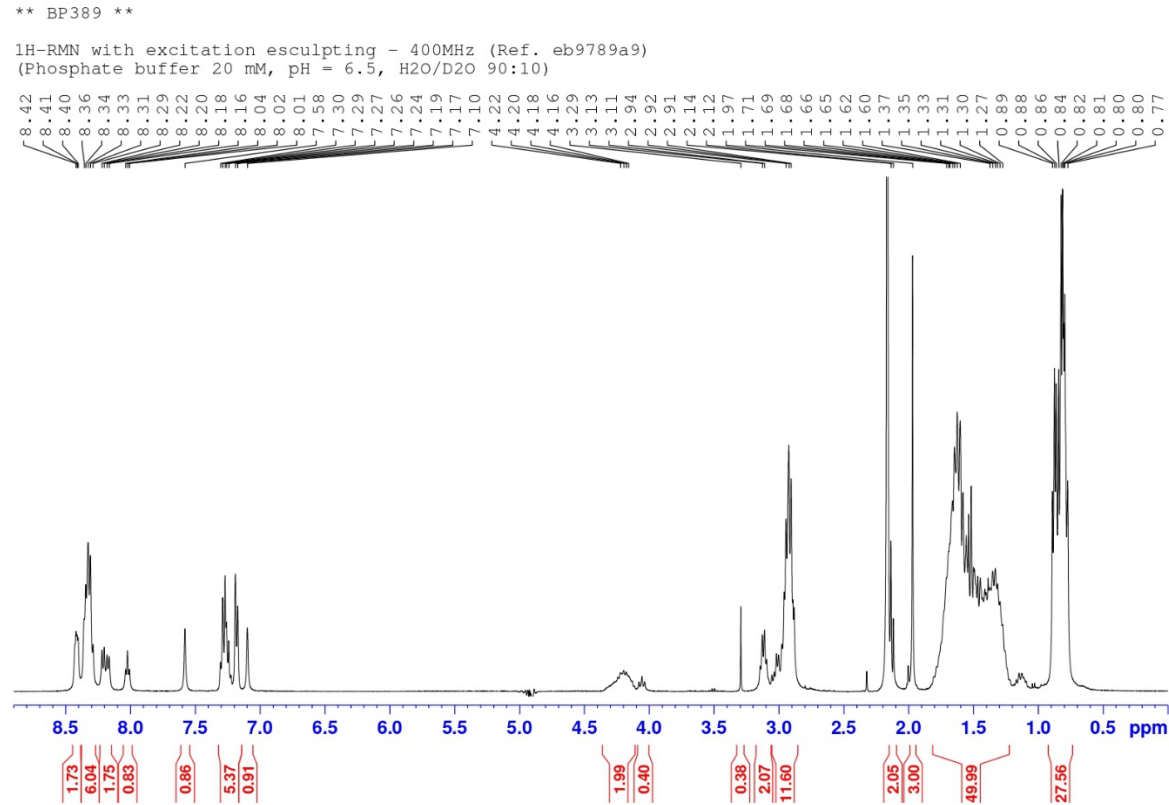

HSQC-TOCSY

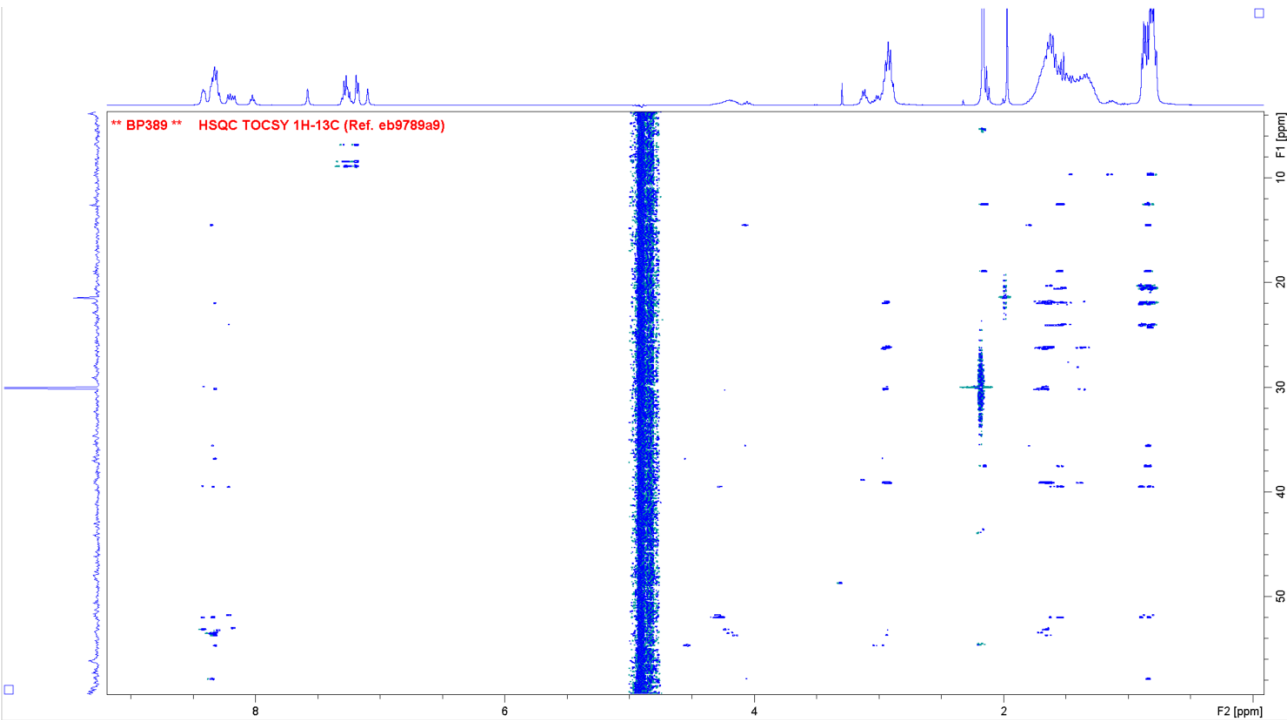

## HSQC $^1\text{H}$ - $^{15}\text{N}$

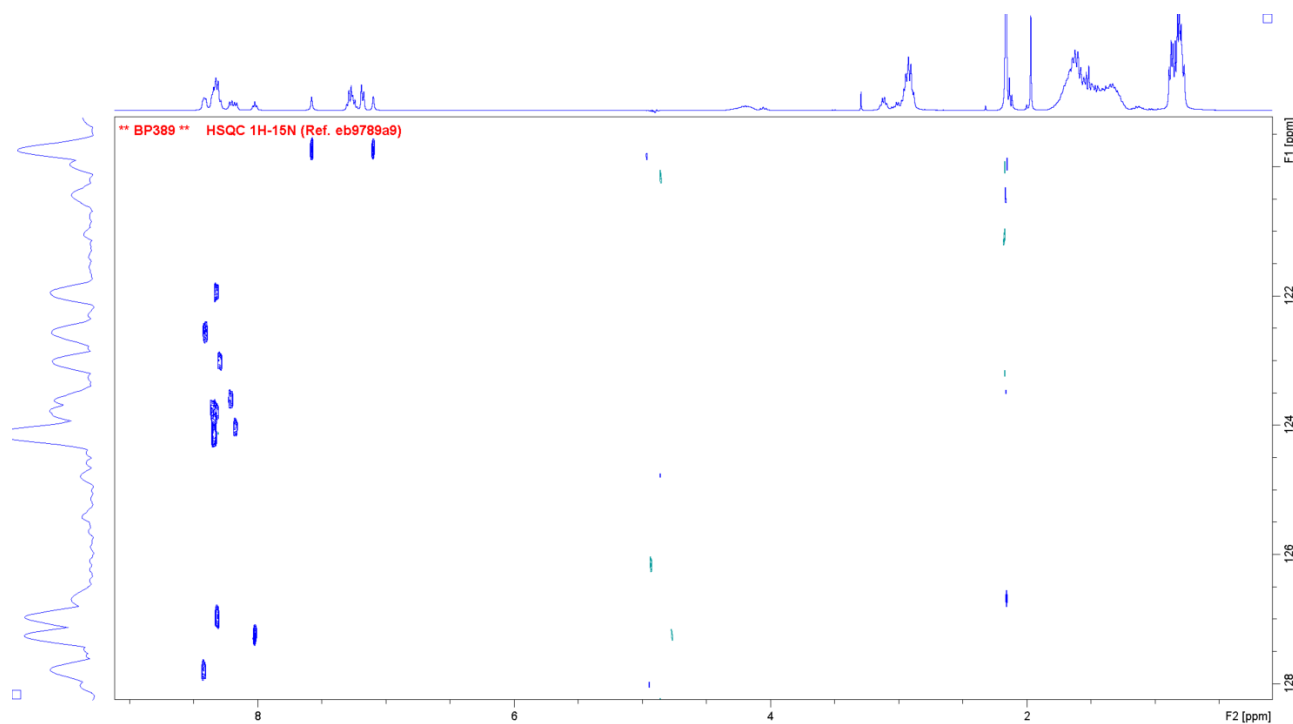

## NOESY

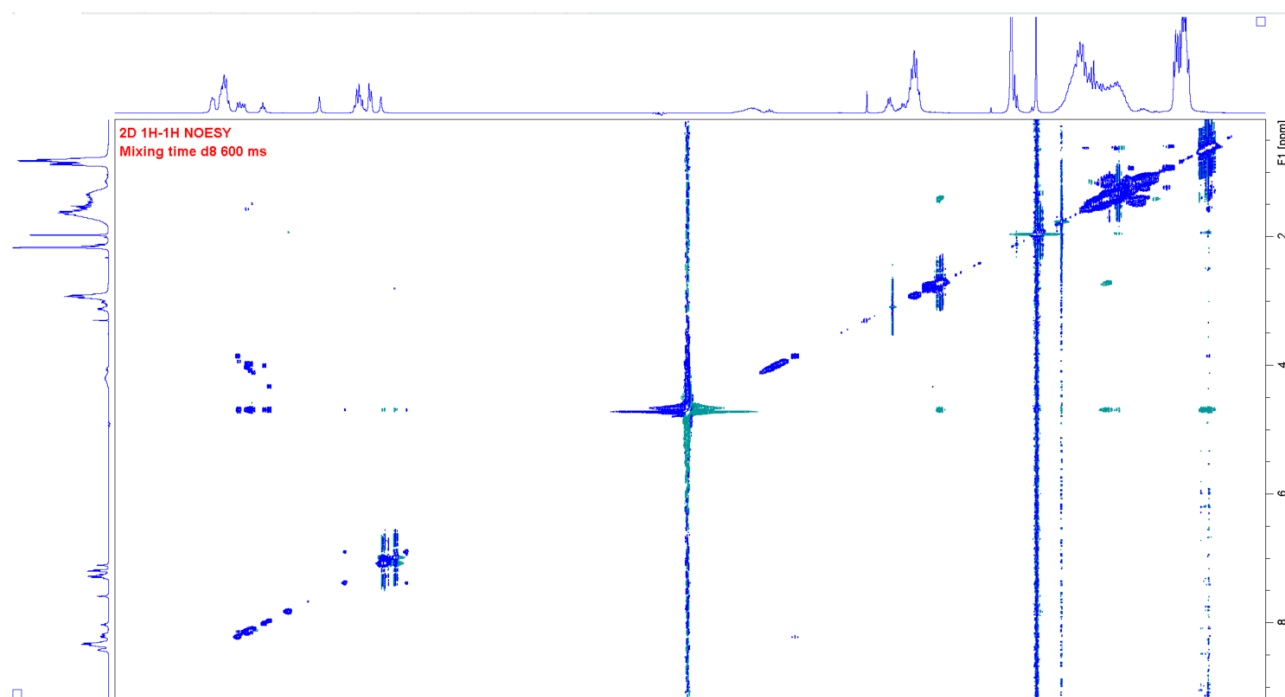

## BP389

400 MHz. 20 mM phosphate buffer, pH = 6.5 H<sub>2</sub>O/D<sub>2</sub>O (90:10), containing 30% CF<sub>3</sub>CD<sub>2</sub>OD

### <sup>1</sup>H-NMR

\*\* BP389 Estructurat \*\*

1H-RMN with excitation esculpting - 400MHz (Ref. eb9971a9)  
(Phosphate buffer 20 mM, pH = 6.5, H<sub>2</sub>O/D<sub>2</sub>O 90:10 + 30% TFE)

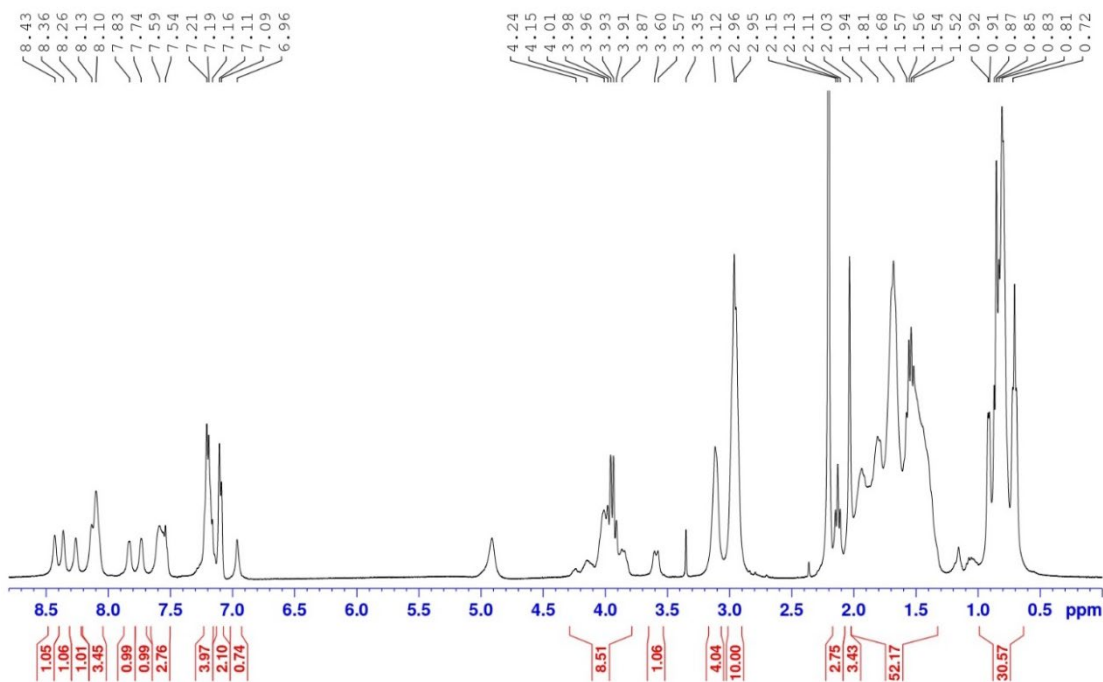

### HSQC-TOCSY

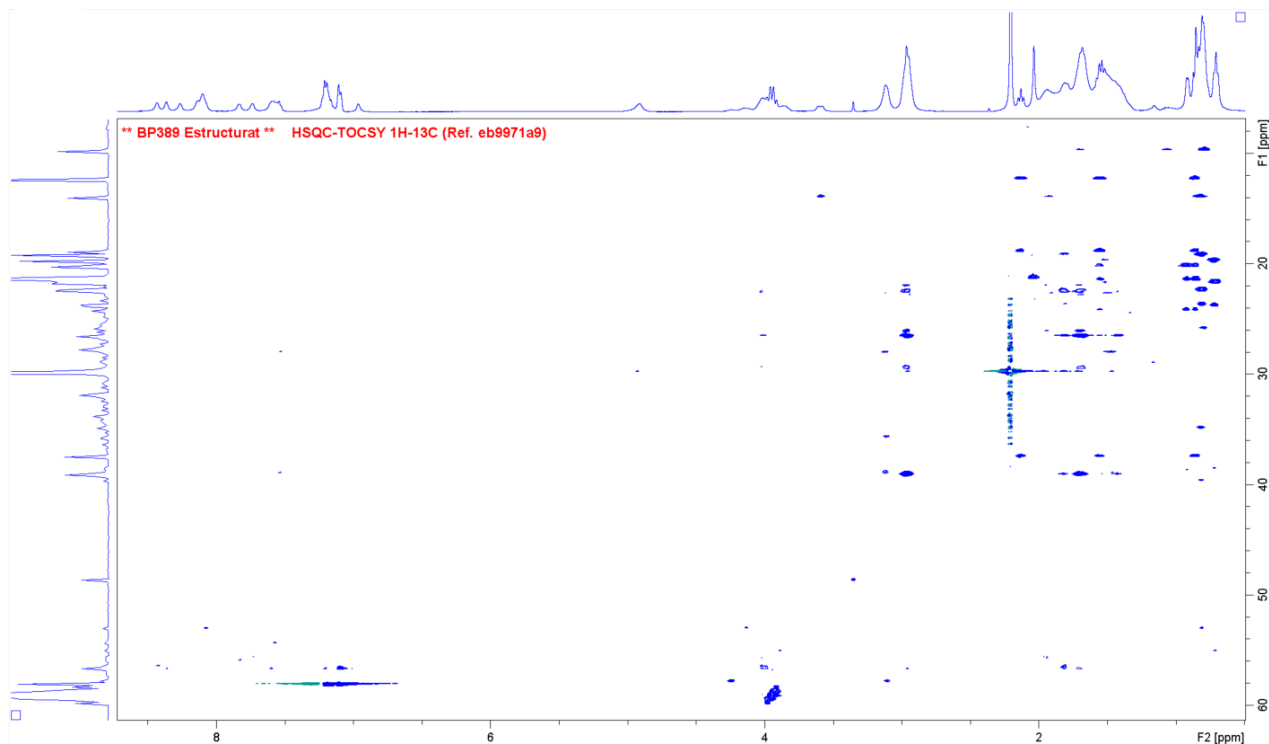

## HSQC $^1\text{H}$ - $^{15}\text{N}$

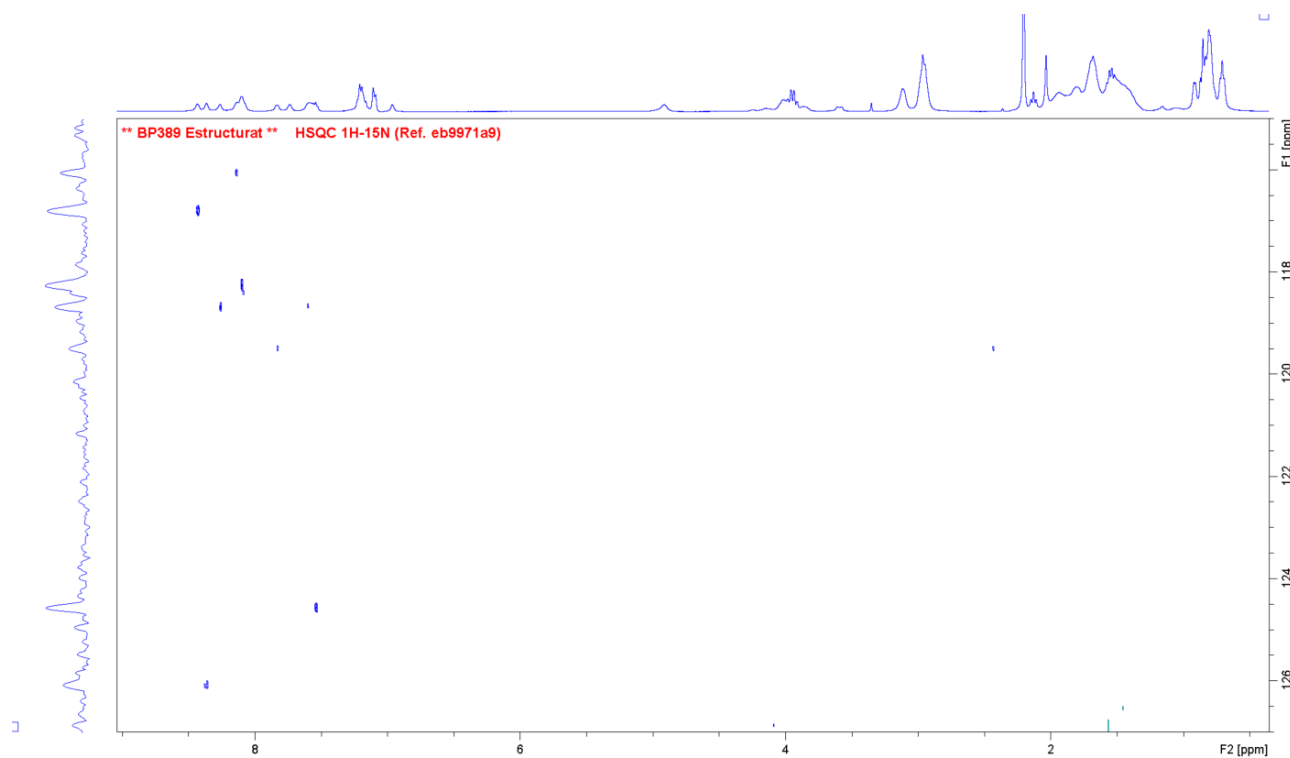

## NOESY

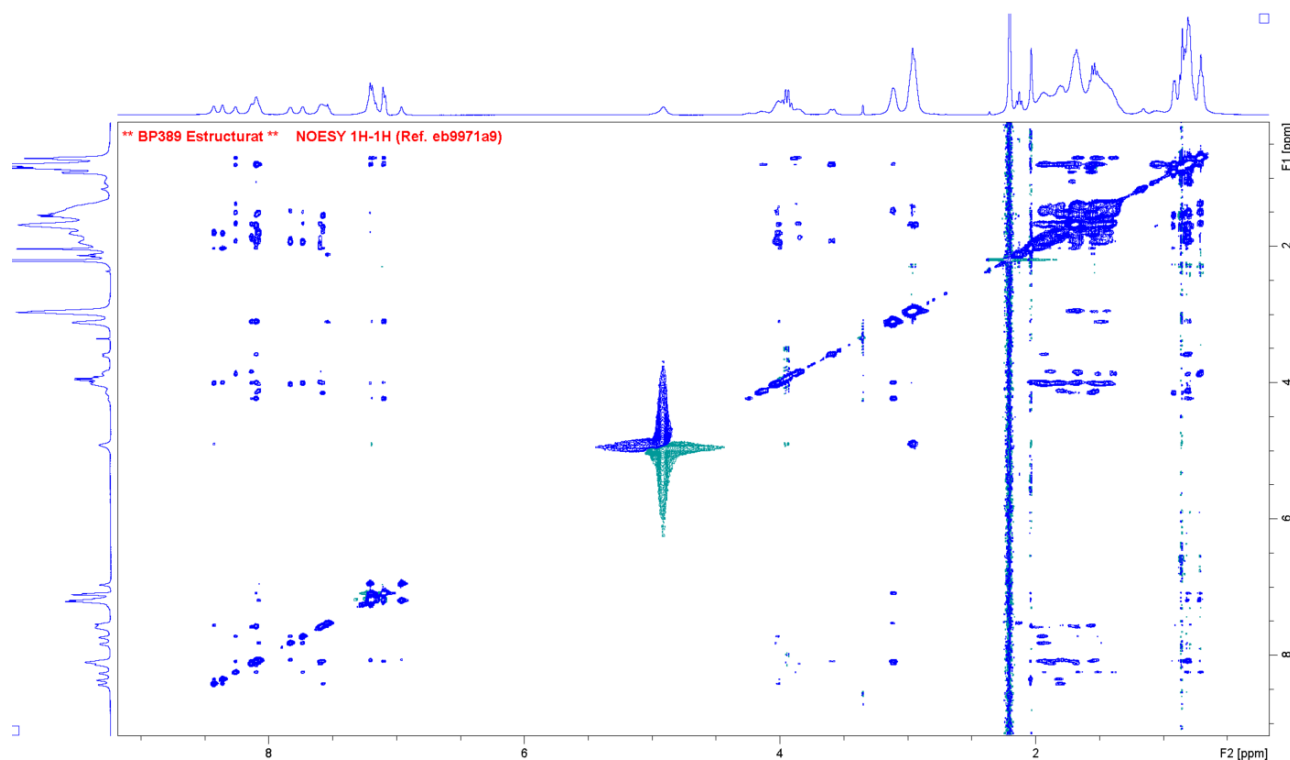



BP475

400 MHz. 20 mM phosphate buffer. pH = 6.5 H<sub>2</sub>O/D<sub>2</sub>O (90:10)

<sup>1</sup>H-NMR

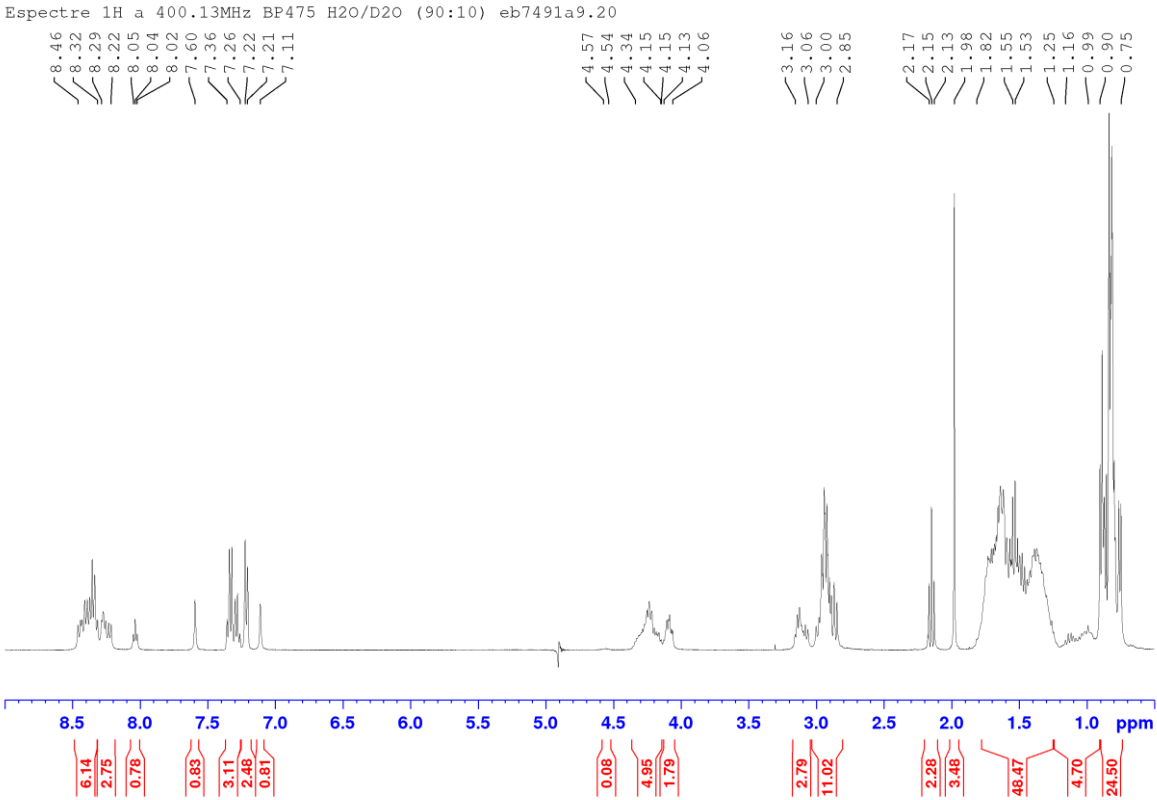

HSQC-TOCSY

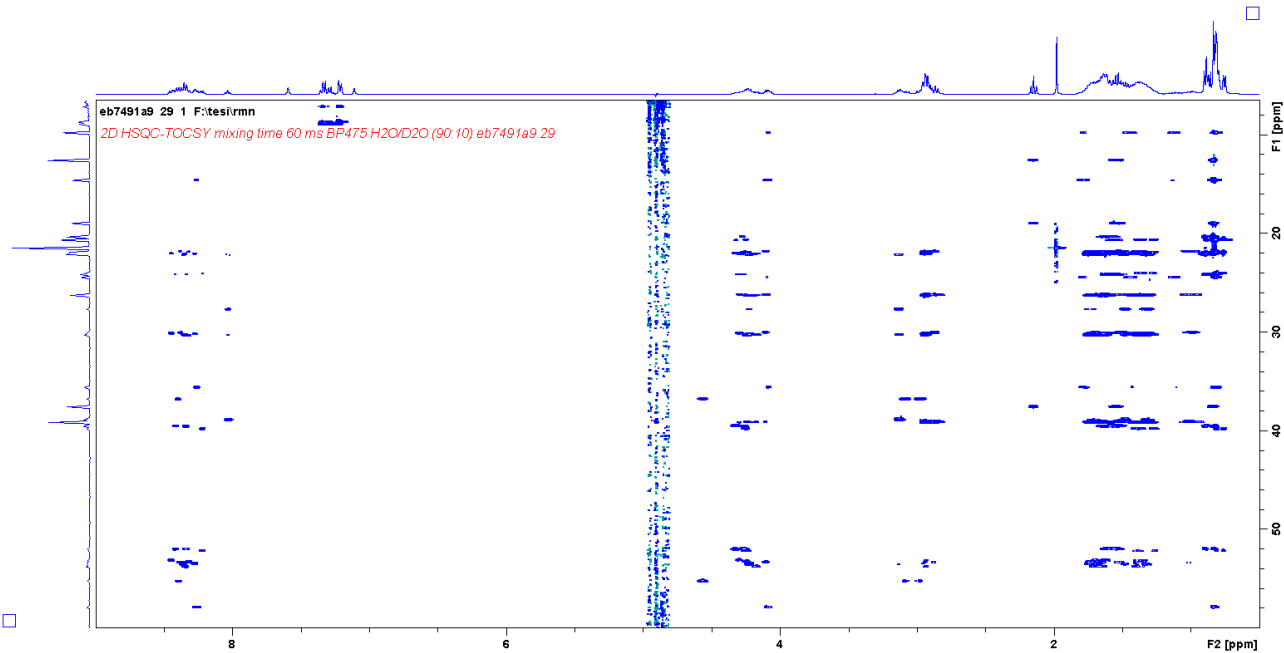

## HSQC $^1\text{H}$ - $^{15}\text{N}$

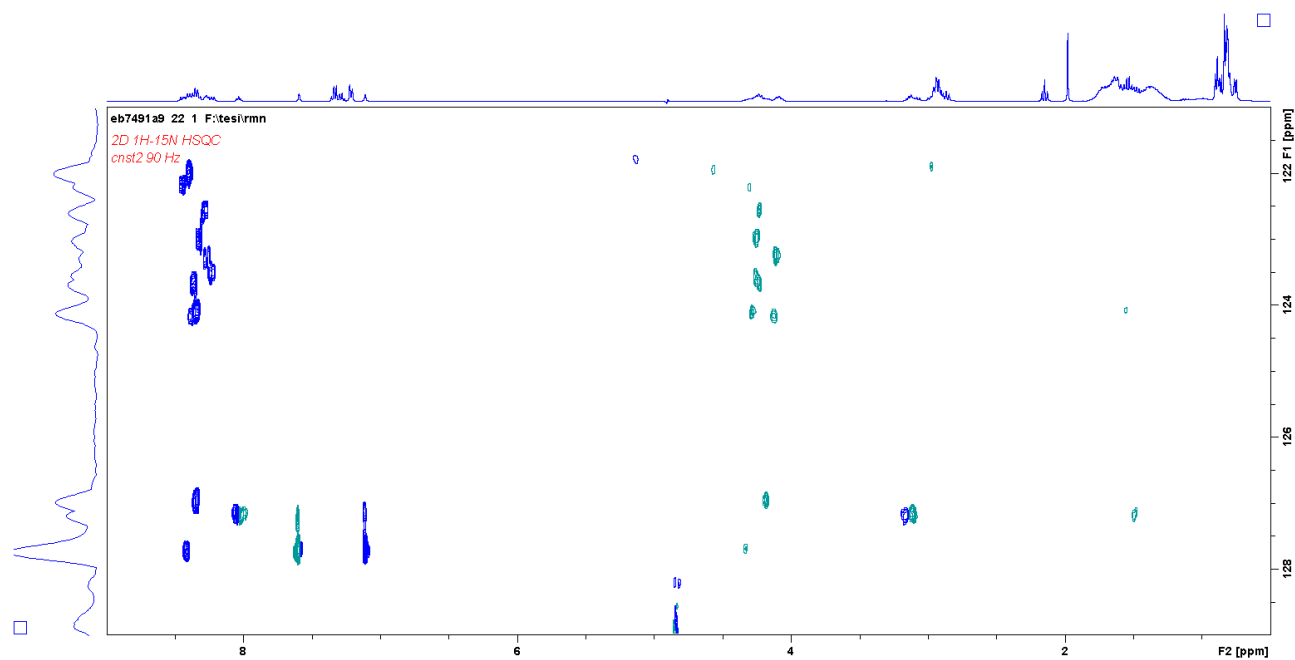

## NOESY

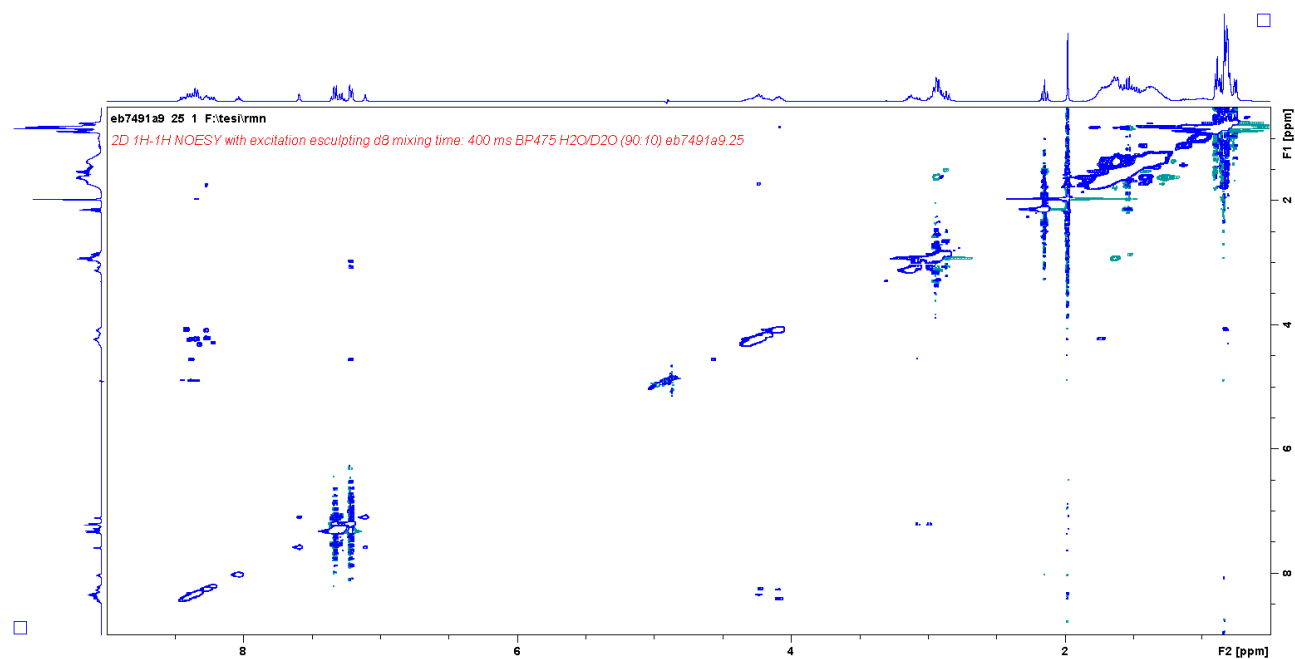

BP475

400 MHz. 20 mM phosphate buffer, pH = 6.5 H<sub>2</sub>O/D<sub>2</sub>O (90:10), containing 30% CF<sub>3</sub>CD<sub>2</sub>OD

<sup>1</sup>H-NMR

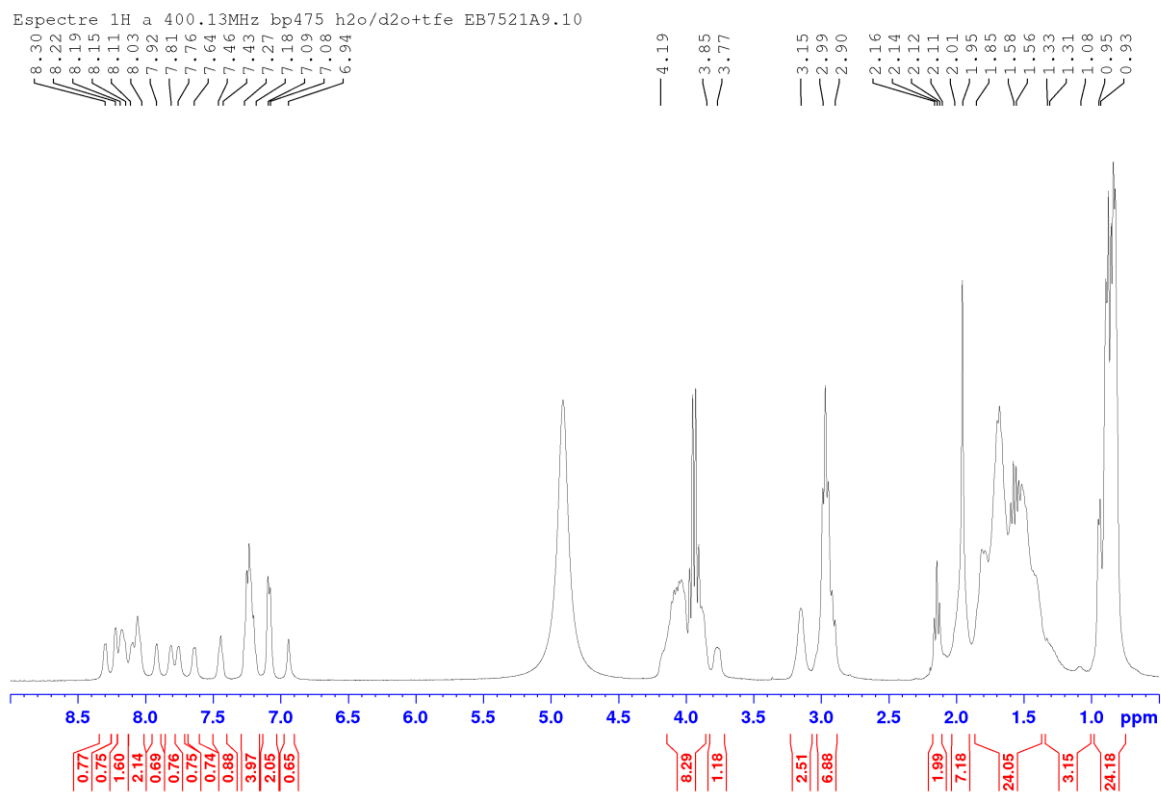

HSQC-TOCSY

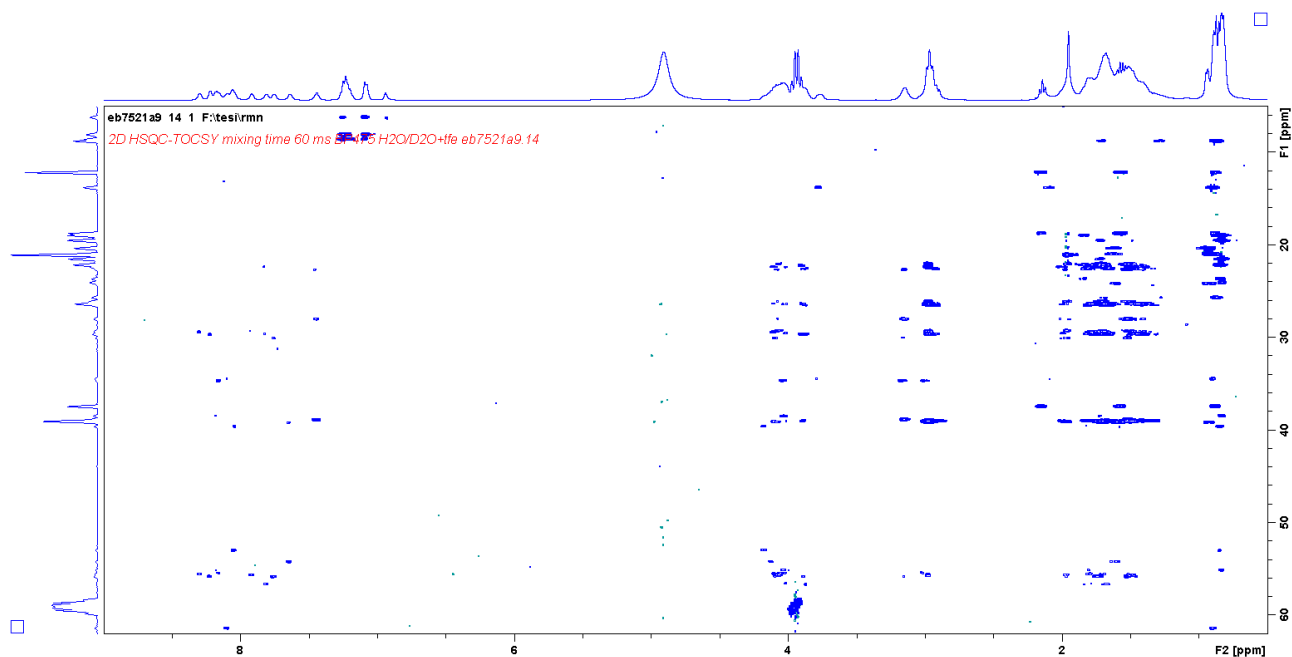

# NOESY

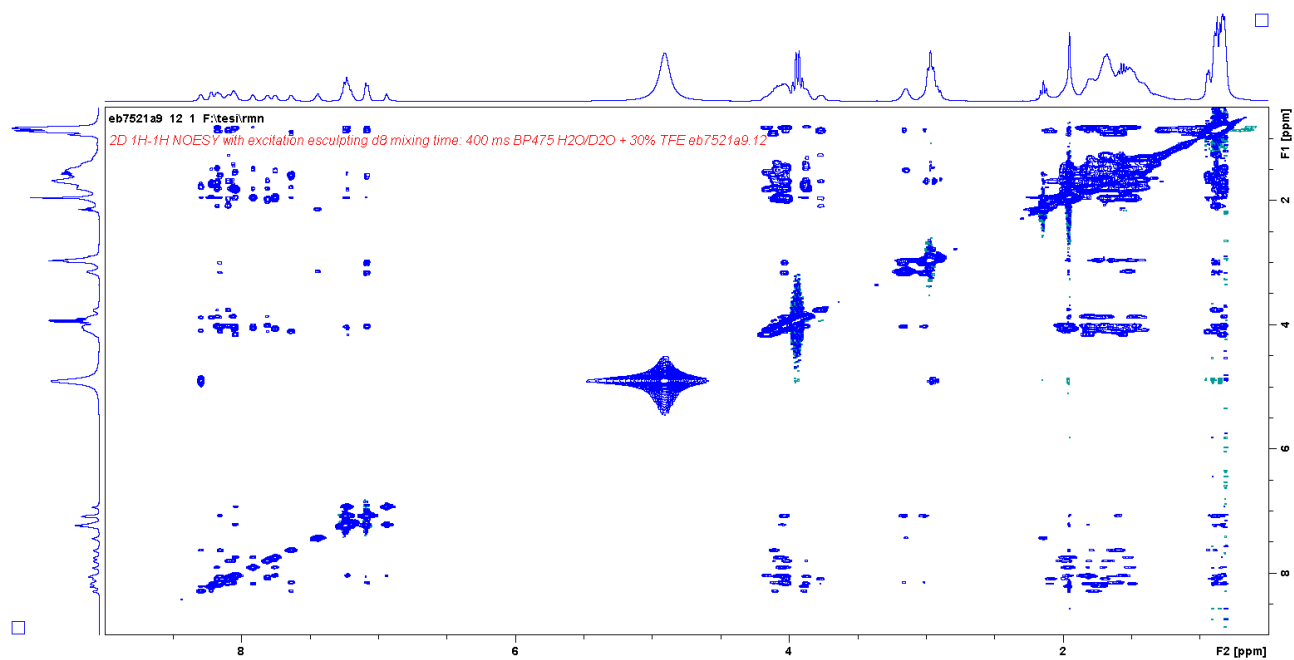

Supplement: s1 [file s1]
